# Supplementary material for: Synthesis of 2-(α-trifluoromethylamino)indoles via stepwise cascade transformation of imidoyl sulfoxonium ylides with ortho-chloromethyl anilines
Source: Royal Society of Chemistry journal article supplement (doi:10.1039/d6ra01734g), 2026-05-08

## SUPPORTING INFORMATION

### Synthesis of 2-( $\alpha$ -Trifluoromethylamino)indoles via Stepwise Cascade Transformation of Imidoyl Sulfoxonium Ylides with *ortho*-Chloromethyl Anilines

Yang Pan <sup>1</sup>, Yin wang <sup>3</sup>, Xiwei Zhou <sup>3</sup>, Tengxiaoxiao Liu<sup>3</sup>, Xiaoke Zhang <sup>3,\*</sup>, and Tao Jiang <sup>2,\*</sup>

1 Department of Medical Technology, Guiyang Kangyang University, Guiyang, 550081, Guizhou, P.R. China;

2 Department of Radiology, Fuling Hospital Affiliated to Chongqing University, Fuling, 408099, Chongqing, P.R. China;

3 The Key Laboratory of Pharmaceutical Research for Tumor Prevention and Treatment of the Education Department of Guizhou Province, Zunyi Medical University, Zunyi, 563000, Guizhou, P.R. China.

\*Correspondence: xiaokezhang53@163.com; laijiangtaotao@163.com

## Table of Contents

### Page

|                                                          |     |
|----------------------------------------------------------|-----|
| 1. General information.....                              | S3  |
| 2. The Synthesis of Imidoyl Sulfoxonium Ylide.....       | S3  |
| 3. The Synthesis of Azadiene Precursors.....             | S4  |
| 4. General Experimental Procedure.....                   | S4  |
| 5. The X-ray data .....                                  | S4  |
| 6. $^1\text{H}$ NMR and $^{13}\text{C}$ NMR spectra..... | S6  |
| 7. Reference.....                                        | S12 |
| 8. NMR spectra.....                                      | S13 |

## 1) General information

All reactions were carried out in the air. All reagents were purchased from commercial suppliers and used without further purification unless otherwise noted. Thin-layer chromatography was performed using silica gel GF254 pre-coated plates (0.20–0.25 mm thickness) with a fluorescent indicator. Visualization on TLC was achieved by UV light (254 nm). Column chromatography was performed on silica gel 90, 200–300 mesh.  $^1\text{H}$  and  $^{13}\text{C}$  NMR (400 and 100 MHz, respectively) spectra were recorded on a Bruker Advance 400 spectrometer. Melting points are uncorrected.  $^1\text{H}$  NMR chemical shifts are reported in ppm ( $\delta$ ) relative to tetramethylsilane (TMS) with the solvent resonance employed as the internal standard ( $\text{CDCl}_3$ ,  $\delta$  7.26 ppm). Data are reported as follows: chemical shift, multiplicity (s = singlet, d = doublet, t = triplet, q = quartet, m = multiplet), coupling constants (Hz) and integration.  $^{13}\text{C}$  NMR chemical shifts are reported in ppm from tetramethylsilane (TMS) with the solvent resonance as the internal standard ( $\text{CDCl}_3$ ,  $\delta$  77.16). High resolution mass spectra (HRMS) were obtained using a Fourier Transform Ion Cyclotron Resonance (FTICR) mass spectrometer and electrospray ionization (ESI).

## 2) The Synthesis of Imidoyl Sulfoxonium Ylides <sup>1</sup>

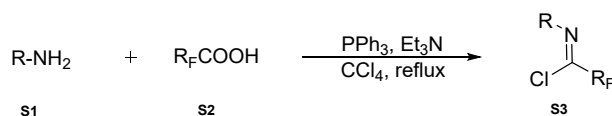

To a two-necked flask under a nitrogen atmosphere was added triphenylphosphine (18.8 mmol), triethylamine (7.5 mmol), carbon tetrachloride ( $\text{CCl}_4$ , 20.0 mL), and trifluoroacetic acid **S2** (7.5 mmol). The mixture was stirred in an ice bath for 20 minutes. A solution of the amine **S1** (7.5 mmol) in  $\text{CCl}_4$  (20.0 mL) was then added, and the reaction mixture was refluxed for 3–6 hours. Upon completion, the reaction mixture was filtered, and the resulting solid was washed with petroleum ether. Then, the petroleum ether was concentrated to afford the crude product, which was purified by column chromatography on silica gel or neutral alumina to yield the desired compound **S3**.

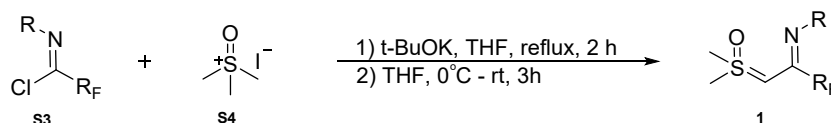

A suspension of trimethylsulfoxonium iodide **S4** (9 mmol, 3.0 equiv) in THF (100 mL)

was treated with *t*-BuOK (9 mmol, 3.0 equiv) and stirred at rt for 2 h. Fluorinated imidoyl chloride **S3** (3 mmol, 1.0 equiv) was then added, and the mixture was stirred for a further 3 h at room temperature. After filtration through Celite, the solvent was removed in vacuo. The crude residue was purified by flash chromatography to yield the product **1**.

### 3) The Synthesis of Azadiene Precursors <sup>2</sup>

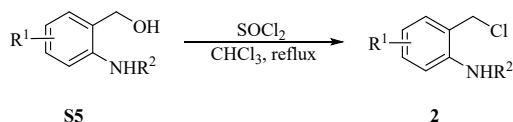

To a solution of thionyl chloride (7 mmol) in CHCl<sub>3</sub> (5 mL), was added a solution of **S5** (3 mmol) in CHCl<sub>3</sub> (20 mL) over 5 min. The mixture was heated to 40 °C for overnight. After the reaction cooled to room temperature, then poured into ice water (10 mL). The aqueous layer was extracted with CHCl<sub>3</sub> (100 mL). The combined organic layers were washed with brine (30 mL), dried over MgSO<sub>4</sub>. Evaporation of the solvent under reduced pressure and the crude product was purified by flash column chromatography affording **2**.

### 4) General Experimental Procedure

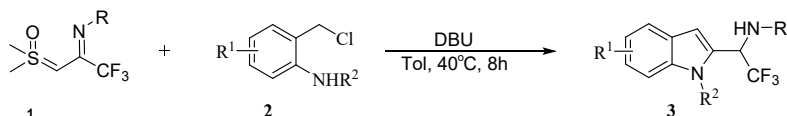

To a stirred solution of imidoyl sulfoxonium ylides **1** (0.2 mmol) and azadiene precursors **2** (0.1 mmol) in Tol (2 mL) at room temperature, DBU (0.15 mmol) was added. The reaction was performed at 40 °C. After the reaction completed indicated by the TLC. Then, the mixture concentrated in vacuo and the crude product was purified by flash chromatography eluting with (petroleum ether/ethyl acetate 10:1) to afford the products **3**.

### 5) The X-ray data

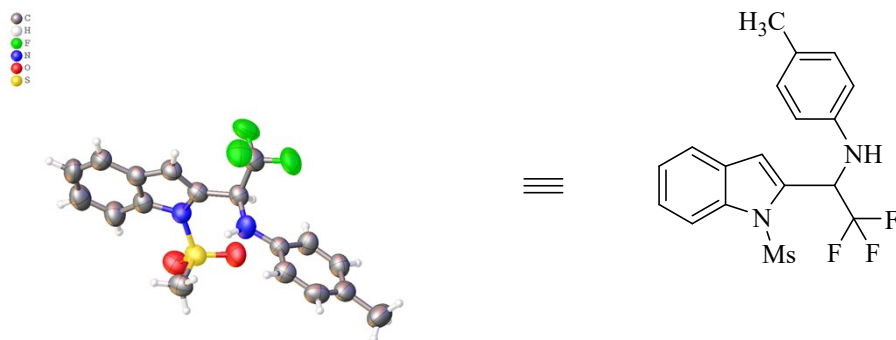

Single crystal of **3f** [C<sub>18</sub>H<sub>17</sub>F<sub>3</sub>N<sub>2</sub>O<sub>2</sub>S] was obtained from the CDCl<sub>3</sub>. CCDC 2504930 containing the supplementary crystallographic data can be obtained free of charge from The Cambridge Crystallographic Data Centre via [www.ccdc.cam.ac.uk/data\\_request/cif](http://www.ccdc.cam.ac.uk/data_request/cif).

|                                    |                                                                                |
|------------------------------------|--------------------------------------------------------------------------------|
| Identification code                | 251120b1_0m_a                                                                  |
| Empirical formula                  | C <sub>18</sub> H <sub>17</sub> F <sub>3</sub> N <sub>2</sub> O <sub>2</sub> S |
| Formula weight                     | 382.39                                                                         |
| Temperature/K                      | 273.15                                                                         |
| Crystal system                     | monoclinic                                                                     |
| Space group                        | P2 <sub>1</sub> /n                                                             |
| a/Å                                | 13.219(4)                                                                      |
| b/Å                                | 5.4793(17)                                                                     |
| c/Å                                | 24.982(8)                                                                      |
| α/°                                | 90                                                                             |
| β/°                                | 99.975(14)                                                                     |
| γ/°                                | 90                                                                             |
| Volume/Å <sup>3</sup>              | 1782.1(10)                                                                     |
| Z                                  | 4                                                                              |
| ρ <sub>calc</sub> /cm <sup>3</sup> | 1.425                                                                          |
| μ/mm <sup>-1</sup>                 | 0.226                                                                          |
| F(000)                             | 792.0                                                                          |
| Crystal size/mm <sup>3</sup>       | 0.4 × 0.4 × 0.35                                                               |
| Radiation                          | MoKα (λ = 0.71073)                                                             |
| 2θ range for data collection/°     | 5.392 to 52.742                                                                |
| Index ranges                       | -16 ≤ h ≤ 16, -6 ≤ k ≤ 6, -31 ≤ l ≤ 31                                         |
| Reflections collected              | 19156                                                                          |
| Independent reflections            | 3639 [R <sub>int</sub> = 0.1274, R <sub>sigma</sub> = 0.0917]                  |
| Data/restraints/parameters         | 3639/0/237                                                                     |

|                                             |                                                   |
|---------------------------------------------|---------------------------------------------------|
| Goodness-of-fit on F <sup>2</sup>           | 1.011                                             |
| Final R indexes [ $I \geq 2\sigma(I)$ ]     | R <sub>1</sub> = 0.0686, wR <sub>2</sub> = 0.1196 |
| Final R indexes [all data]                  | R <sub>1</sub> = 0.1534, wR <sub>2</sub> = 0.1548 |
| Largest diff. peak/hole / e Å <sup>-3</sup> | 0.35/-0.30                                        |

## 6) <sup>1</sup>H NMR and <sup>13</sup>C NMR Spectra

### *N*-(2,2,2-trifluoro-1-(1-(methylsulfonyl)-1H-indol-2-yl)ethyl)aniline **3a**

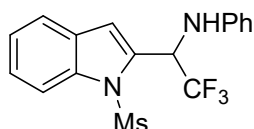

White solid, 30 mg, 83% yield. <sup>1</sup>H NMR (400 MHz, CDCl<sub>3</sub>) δ 7.93 (d, *J* = 8.5 Hz, 1H), 7.51 (d, *J* = 7.8 Hz, 1H), 7.31 (t, *J* = 7.9 Hz, 1H), 7.23 (t, *J* = 7.5 Hz, 1H), 7.13 (t, *J* = 7.8 Hz, 2H), 6.88 (s, 1H), 6.74 (t, *J* = 7.7 Hz, 3H), 6.27 (q, *J* = 6.7 Hz, 1H), 4.02 (s, 1H), 2.99 (s, 3H). <sup>13</sup>C NMR (100 MHz, CDCl<sub>3</sub>) δ 144.76, 136.90, 134.35, 129.52, 128.61, 125.91, 124.20, 121.64, 120.09, 114.43, 114.37, 111.17, 53.10 (q, *J*<sub>(C-F)</sub> = 31.0 Hz), 40.77. <sup>19</sup>F NMR (376 MHz, CDCl<sub>3</sub>) δ -73.13. HRMS (ESI) calcd for C<sub>17</sub>H<sub>15</sub>F<sub>3</sub>N<sub>2</sub>O<sub>2</sub>S [M+Na]<sup>+</sup> 391.0698, found 391.0690.

### *4*-fluoro-*N*-(2,2,2-trifluoro-1-(1-(methylsulfonyl)-1H-indol-2-yl)ethyl)aniline **3b**

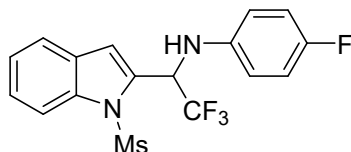

White solid, 28 mg, 72% yield. <sup>1</sup>H NMR (400 MHz, CDCl<sub>3</sub>) δ 7.94 (d, *J* = 8.5 Hz, 1H), 7.53 (d, *J* = 7.8 Hz, 1H), 7.29 (dt, *J* = 30.3, 7.5 Hz, 2H), 6.85 (dd, *J* = 14.5, 6.0 Hz, 3H), 6.74-6.64 (m, 2H), 6.17 (t, *J* = 7.4 Hz, 1H), 4.01-3.75 (m, 1H), 3.02 (s, 3H). <sup>13</sup>C NMR (100 MHz, CDCl<sub>3</sub>) δ 158.36, 155.99, 140.96, 136.83, 134.02, 128.52, 126.00, 124.25, 121.66, 116.17 (d, *J*<sub>(C-F)</sub> = 22.0 Hz), 115.86 (d, *J*<sub>(C-F)</sub> = 8.0 Hz), 114.35, 111.11, 53.54 (q, *J*<sub>(C-F)</sub> = 30.0 Hz), 40.78. <sup>19</sup>F NMR (376 MHz, CDCl<sub>3</sub>) δ -72.73, -124.43. HRMS (ESI) calcd for C<sub>17</sub>H<sub>14</sub>F<sub>4</sub>N<sub>2</sub>O<sub>2</sub>S [M+Na]<sup>+</sup> 409.0604, found 409.0609.

### *4*-chloro-*N*-(2,2,2-trifluoro-1-(1-(methylsulfonyl)-1H-indol-2-yl)ethyl)aniline **3c**

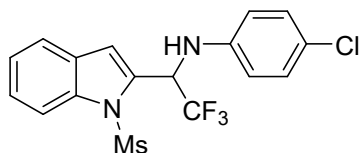

White solid, 30 mg, 75% yield. <sup>1</sup>H NMR (400 MHz, CDCl<sub>3</sub>) δ 7.94 (d, *J* = 8.4 Hz, 1H), 7.53 (d, *J* = 7.8 Hz, 1H), 7.30 (dt, *J* = 31.2, 7.5 Hz, 2H), 7.13-7.01 (m, 2H), 6.88 (s, 1H), 6.68 (d, *J* = 8.3 Hz, 2H), 6.27-6.14 (m, 1H), 4.03 (d, *J* = 9.1 Hz, 1H), 3.03 (s, 3H). <sup>13</sup>C NMR (100 MHz, CDCl<sub>3</sub>) δ 143.34, 136.84, 133.77, 129.41, 128.50, 126.07, 124.85, 124.29, 121.68, 115.54, 114.36, 111.24, 52.84 (q, *J*<sub>(C-F)</sub> = 31.0 Hz), 40.80. <sup>19</sup>F NMR (376 MHz, CDCl<sub>3</sub>) δ -72.83. HRMS (ESI) calcd for C<sub>17</sub>H<sub>14</sub>ClF<sub>3</sub>N<sub>2</sub>O<sub>2</sub>S [M+Na]<sup>+</sup> 425.0309, found 425.0306.

### *4*-bromo-*N*-(2,2,2-trifluoro-1-(1-(methylsulfonyl)-1H-indol-2-yl)ethyl)aniline **3d**

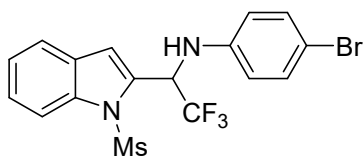

White solid, 35 mg, 79% yield.  $^1\text{H}$  NMR (400 MHz,  $\text{CDCl}_3$ )  $\delta$  7.94 (d,  $J = 8.5$  Hz, 1H), 7.52 (d,  $J = 7.8$  Hz, 1H), 7.36-7.18 (m, 4H), 6.87 (s, 1H), 6.63 (d,  $J = 8.4$  Hz, 2H), 6.21 (dd,  $J = 10.0, 6.0$  Hz, 1H), 4.04 (d,  $J = 10.2$  Hz, 1H), 3.02 (s, 3H).  $^{13}\text{C}$  NMR (100 MHz,  $\text{CDCl}_3$ )  $\delta$  143.80, 136.82, 133.68, 132.30, 128.49, 126.09, 124.30, 121.70, 115.94, 114.35, 111.96, 111.27, 52.67 (q,  $J_{(C-F)} = 31.0$  Hz), 40.81.  $^{19}\text{F}$  NMR (376 MHz,  $\text{CDCl}_3$ )  $\delta$  -72.81. HRMS (ESI) calcd for  $\text{C}_{17}\text{H}_{14}\text{BrF}_3\text{N}_2\text{O}_2\text{S}$   $[\text{M}+\text{Na}]^+$  468.9803, found 468.9808.

**3-chloro-N-(2,2,2-trifluoro-1-(1-(methylsulfonyl)-1H-indol-2-yl)ethyl)aniline 3e**

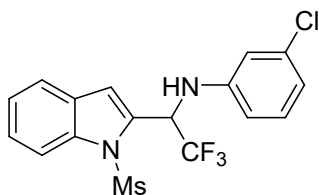

White solid, 30 mg, 74% yield.  $^1\text{H}$  NMR (400 MHz,  $\text{CDCl}_3$ )  $\delta$  7.93 (d,  $J = 8.5$  Hz, 1H), 7.52 (d,  $J = 7.8$  Hz, 1H), 7.29 (dt,  $J = 30.6, 7.6$  Hz, 2H), 7.04 (t,  $J = 8.2$  Hz, 1H), 6.88 (s, 1H), 6.79 – 6.65 (m, 2H), 6.62 (dd,  $J = 8.2, 2.2$  Hz, 1H), 6.23 (dd,  $J = 10.0, 6.2$  Hz, 1H), 4.11 (d,  $J = 10.3$  Hz, 1H), 3.01 (s, 3H).  $^{13}\text{C}$  NMR (100 MHz,  $\text{CDCl}_3$ )  $\delta$  145.95, 136.89, 135.18, 133.66, 130.58, 128.53, 126.11, 124.32, 121.72, 120.02, 114.40, 114.37, 112.29, 111.43, 52.56 (q,  $J_{(C-F)} = 31.0$  Hz), 40.77.  $^{19}\text{F}$  NMR (376 MHz,  $\text{CDCl}_3$ )  $\delta$  -72.93. HRMS (ESI) calcd for  $\text{C}_{17}\text{H}_{14}\text{ClF}_3\text{N}_2\text{O}_2\text{S}$   $[\text{M}+\text{Na}]^+$  425.0309, found 425.0304.

**4-methyl-N-(2,2,2-trifluoro-1-(1-(methylsulfonyl)-1H-indol-2-yl)ethyl)aniline 3f**

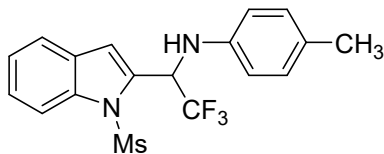

White solid, 28 mg, 73% yield.  $^1\text{H}$  NMR (400 MHz,  $\text{CDCl}_3$ )  $\delta$  7.93 (d,  $J = 8.5$  Hz, 1H), 7.50 (d,  $J = 7.8$  Hz, 1H), 7.26 (dt,  $J = 29.5, 7.6$  Hz, 2H), 6.93 (d,  $J = 7.9$  Hz, 2H), 6.86 (s, 1H), 6.66 (dd,  $J = 6.8, 4.6$  Hz, 2H), 6.21 (q,  $J = 7.1, 6.5$  Hz, 1H), 3.90 (s, 1H), 3.00 (s, 3H), 2.15 (s, 3H).  $^{13}\text{C}$  NMR (100 MHz,  $\text{CDCl}_3$ )  $\delta$  142.38, 136.87, 134.45, 130.02, 129.48, 128.61, 125.85, 124.16, 121.62, 114.66, 114.36, 111.03, 52.98 (q,  $J_{(C-F)} = 31.0$  Hz), 40.79, 20.45.  $^{19}\text{F}$  NMR (376 MHz,  $\text{CDCl}_3$ )  $\delta$  -72.78. HRMS (ESI) calcd for  $\text{C}_{18}\text{H}_{17}\text{F}_3\text{N}_2\text{O}_2\text{S}$   $[\text{M}+\text{Na}]^+$  405.0855, found 405.0851.

**3-methyl-N-(2,2,2-trifluoro-1-(1-(methylsulfonyl)-1H-indol-2-yl)ethyl)aniline 3g**

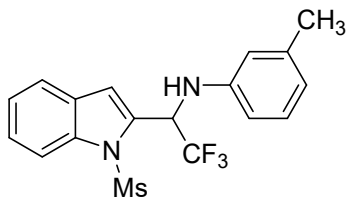

White solid, 24 mg, 64% yield.  $^1\text{H}$  NMR (400 MHz,  $\text{CDCl}_3$ )  $\delta$  7.94 (d,  $J = 8.4$  Hz, 1H), 7.51 (d,  $J = 7.8$  Hz, 1H), 7.31 (t,  $J = 7.9$  Hz, 1H), 7.23 (t,  $J = 7.5$  Hz, 1H), 7.02 (t,  $J = 8.0$  Hz, 1H), 6.87 (s, 1H), 6.55 (d,  $J = 6.7$  Hz, 3H), 6.26 (dd,  $J = 10.7, 6.2$  Hz, 1H), 3.98 (d,  $J = 10.6$  Hz,

1H), 3.00 (s, 3H), 2.20 (s, 3H). <sup>13</sup>C NMR (100 MHz, CDCl<sub>3</sub>) δ 143.68, 138.35, 135.83, 133.41, 128.33, 127.57, 124.83, 123.13, 120.58, 119.95, 114.22, 113.31, 110.36, 110.07, 51.67 (q, *J*<sub>(C-F)</sub> = 31.0 Hz), 39.72, 20.52. <sup>19</sup>F NMR (376 MHz, CDCl<sub>3</sub>) δ -72.93. HRMS (ESI) calcd for C<sub>18</sub>H<sub>17</sub>F<sub>3</sub>N<sub>2</sub>O<sub>2</sub>S [M+Na]<sup>+</sup> 405.0855, found 405.0857.

**2-methyl-N-(2,2,2-trifluoro-1-(1-(methylsulfonyl)-1H-indol-2-yl)ethyl)aniline 3h**

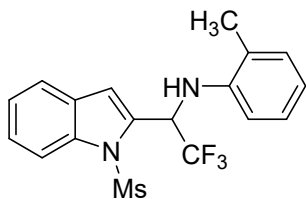

White solid, 27 mg, 70% yield. <sup>1</sup>H NMR (400 MHz, CDCl<sub>3</sub>) δ 7.92 (d, *J* = 8.4 Hz, 1H), 7.51 (d, *J* = 7.8 Hz, 1H), 7.31 (t, *J* = 7.8 Hz, 1H), 7.24 (q, *J* = 7.4, 6.7 Hz, 1H), 7.06-6.94 (m, 2H), 6.88 (s, 1H), 6.80 (d, *J* = 8.1 Hz, 1H), 6.68 (t, *J* = 7.4 Hz, 1H), 6.31 (q, *J* = 7.1, 6.5 Hz, 1H), 3.97 (s, 1H), 2.99 (s, 3H), 2.13 (s, 3H). <sup>13</sup>C NMR (100 MHz, CDCl<sub>3</sub>) δ 142.78, 136.97, 134.70, 130.69, 128.61, 127.42, 125.92, 124.22, 123.04, 121.66, 119.72, 114.35, 112.35, 111.18, 52.68 (q, *J*<sub>(C-F)</sub> = 31.0 Hz), 40.73, 17.48. <sup>19</sup>F NMR (376 MHz, CDCl<sub>3</sub>) δ -73.17, -75.58. HRMS (ESI) calcd for C<sub>18</sub>H<sub>17</sub>F<sub>3</sub>N<sub>2</sub>O<sub>2</sub>S [M+Na]<sup>+</sup> 405.0855, found 405.0858.

**4-(tert-butyl)-N-(2,2,2-trifluoro-1-(1-(methylsulfonyl)-1H-indol-2-yl)ethyl)aniline 3i**

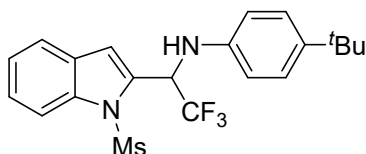

White solid, 32 mg, 75% yield. <sup>1</sup>H NMR (400 MHz, CDCl<sub>3</sub>) δ 7.94 (d, *J* = 8.5 Hz, 1H), 7.51 (d, *J* = 7.8 Hz, 1H), 7.31 (t, *J* = 7.9 Hz, 1H), 7.23 (t, *J* = 7.5 Hz, 1H), 7.15 (d, *J* = 8.6 Hz, 2H), 6.88 (s, 1H), 6.68 (d, *J* = 8.3 Hz, 2H), 6.24 (s, 1H), 3.95 (s, 1H), 3.01 (s, 3H), 1.18 (s, 9H). <sup>13</sup>C NMR (100 MHz, CDCl<sub>3</sub>) δ 142.88, 142.21, 136.89, 134.64, 128.64, 126.30, 125.82, 124.15, 121.60, 114.35, 114.16, 111.08, 53.46 (q, *J*<sub>(C-F)</sub> = 31.0 Hz), 40.80, 34.00, 31.44. <sup>19</sup>F NMR (376 MHz, CDCl<sub>3</sub>) δ -72.96. HRMS (ESI) calcd for C<sub>21</sub>H<sub>23</sub>F<sub>3</sub>N<sub>2</sub>O<sub>2</sub>S [M+Na]<sup>+</sup> 447.1324, found 447.1329.

**4-methoxy-N-(2,2,2-trifluoro-1-(1-(methylsulfonyl)-1H-indol-2-yl)ethyl)aniline 3j**

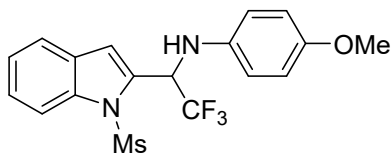

White solid, 23 mg, 57% yield. <sup>1</sup>H NMR (400 MHz, CDCl<sub>3</sub>) δ 7.94 (d, *J* = 8.5 Hz, 1H), 7.52 (d, *J* = 7.8 Hz, 1H), 7.31 (t, *J* = 7.8 Hz, 1H), 7.24 (t, *J* = 7.5 Hz, 1H), 6.87 (s, 1H), 6.72 (s, 4H), 6.14 (q, *J* = 7.0, 6.6 Hz, 1H), 3.84 - 3.48 (m, 4H), 3.01 (s, 3H). <sup>13</sup>C NMR (100 MHz, CDCl<sub>3</sub>) δ 153.87, 138.52, 136.84, 134.47, 128.59, 125.84, 124.16, 121.60, 116.39, 114.91, 114.35, 110.93, 55.60, 53.99 (q, *J*<sub>(C-F)</sub> = 31.0 Hz), 40.79. <sup>19</sup>F NMR (376 MHz, CDCl<sub>3</sub>) δ -72.67. HRMS (ESI) calcd for C<sub>18</sub>H<sub>17</sub>F<sub>3</sub>N<sub>2</sub>O<sub>3</sub>S [M+Na]<sup>+</sup> 421.0804, found 421.0808.

**4-(methylthio)-N-(2,2,2-trifluoro-1-(1-(methylsulfonyl)-1H-indol-2-yl)ethyl)aniline 3k**

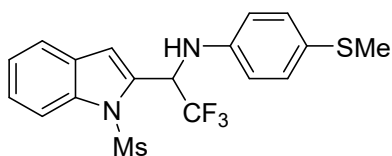

White solid, 21 mg, 50% yield.  $^1\text{H}$  NMR (400 MHz,  $\text{CDCl}_3$ )  $\delta$  7.93 (d,  $J = 8.4$  Hz, 1H), 7.51 (d,  $J = 7.8$  Hz, 1H), 7.31 (t,  $J = 7.8$  Hz, 1H), 7.25 (d,  $J = 7.6$  Hz, 1H), 7.11 (d,  $J = 8.2$  Hz, 2H), 6.87 (s, 1H), 6.69 (d,  $J = 8.2$  Hz, 2H), 6.23 (t,  $J = 7.3$  Hz, 1H), 4.02 (d,  $J = 10.0$  Hz, 1H), 3.00 (s, 3H), 2.32 (s, 3H).  $^{13}\text{C}$  NMR (100 MHz,  $\text{CDCl}_3$ )  $\delta$  143.16, 136.85, 134.03, 130.34, 128.55, 127.98, 125.99, 124.25, 121.67, 115.07, 114.35, 111.21, 53.10 (q,  $J_{\text{(C-F)}} = 31.0$  Hz), 40.81, 18.00.  $^{19}\text{F}$  NMR (376 MHz,  $\text{CDCl}_3$ )  $\delta$  -72.81. HRMS (ESI) calcd for  $\text{C}_{18}\text{H}_{17}\text{F}_3\text{N}_2\text{O}_2\text{S}_2$   $[\text{M}+\text{Na}]^+$  437.0576, found 437.0573.

***N*-(2,2,2-trifluoro-1-(1-(methylsulfonyl)-1H-indol-2-yl)ethyl)naphthalen-2-amine 3l**

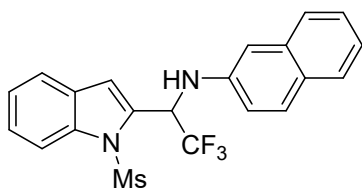

White solid, 30 mg, 71% yield.  $^1\text{H}$  NMR (400 MHz,  $\text{CDCl}_3$ )  $\delta$  7.93 (d,  $J = 8.5$  Hz, 1H), 7.66-7.46 (m, 4H), 7.32-7.15 (m, 4H), 7.03 (s, 1H), 6.96 (dd,  $J = 8.9, 2.4$  Hz, 1H), 6.91 (s, 1H), 6.41 (dt,  $J = 13.8, 6.5$  Hz, 1H), 4.21 (d,  $J = 10.4$  Hz, 1H), 2.99 (s, 3H).  $^{13}\text{C}$  NMR (100 MHz,  $\text{CDCl}_3$ )  $\delta$  142.35, 136.93, 134.59, 134.18, 129.53, 128.62, 128.59, 127.64, 126.70, 126.42, 125.98, 124.24, 123.33, 121.67, 117.38, 114.37, 111.24, 108.02, 52.75 (q,  $J_{\text{(C-F)}} = 31.0$  Hz), 40.80.  $^{19}\text{F}$  NMR (376 MHz,  $\text{CDCl}_3$ )  $\delta$  -72.80. HRMS (ESI) calcd for  $\text{C}_{21}\text{H}_{17}\text{F}_3\text{N}_2\text{O}_2\text{S}$   $[\text{M}+\text{Na}]^+$  441.0855, found 441.0850.

***N*-(2,2,2-trifluoro-1-(4-fluoro-1-(methylsulfonyl)-1H-indol-2-yl)ethyl)aniline 3m**

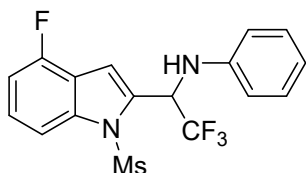

White solid, 27 mg, 70% yield.  $^1\text{H}$  NMR (400 MHz,  $\text{DMSO-}d_6$ )  $\delta$  7.77 (d,  $J = 8.5$  Hz, 1H), 7.45 (q,  $J = 7.6$  Hz, 1H), 7.34 (s, 1H), 7.17 (p,  $J = 9.5$  Hz, 3H), 6.86-6.68 (m, 4H), 6.26 (dt,  $J = 14.4, 7.0$  Hz, 1H), 3.39 (s, 3H).  $^{13}\text{C}$  NMR (100 MHz,  $\text{DMSO-}d_6$ )  $\delta$  156.71 (d,  $J_{\text{(C-F)}} = 246.0$  Hz), 146.29, 138.75 (d,  $J_{\text{(C-F)}} = 9.0$  Hz), 135.13, 129.67, 127.26 (d,  $J_{\text{(C-F)}} = 8.0$  Hz), 118.94, 117.49 (d,  $J_{\text{(C-F)}} = 23.0$  Hz), 113.94, 111.14 (d,  $J_{\text{(C-F)}} = 4.0$  Hz), 109.57 (d,  $J_{\text{(C-F)}} = 18.0$  Hz), 106.49, 52.38 (q,  $J_{\text{(C-F)}} = 30.0$  Hz), 41.72.  $^{19}\text{F}$  NMR (376 MHz,  $\text{CDCl}_3$ )  $\delta$  -72.08 (d,  $J_{\text{(C-F)}} = 18.0$  Hz), -121.38-121.43 (m). HRMS (ESI) calcd for  $\text{C}_{17}\text{H}_{14}\text{F}_4\text{N}_2\text{O}_2\text{S}$   $[\text{M}+\text{Na}]^+$  409.0604, found 409.0606.

***N*-(1-(4-chloro-1-(methylsulfonyl)-1H-indol-2-yl)-2,2,2-trifluoroethyl)aniline 3n**

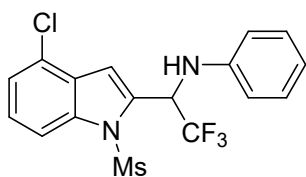

White solid, 30 mg, 75% yield.  $^1\text{H}$  NMR (400 MHz,  $\text{CDCl}_3$ )  $\delta$  7.84 (q,  $J = 4.9$  Hz, 1H), 7.30-7.18 (m, 2H), 7.15 (t,  $J = 7.8$  Hz, 2H), 6.99 (s, 1H), 6.76 (dd,  $J = 10.9, 7.8$  Hz, 3H), 6.34-6.20 (m, 1H), 4.17-3.92 (m, 1H), 3.03 (s, 3H).  $^{13}\text{C}$  NMR (100 MHz,  $\text{CDCl}_3$ )  $\delta$  144.56, 137.40, 135.11, 129.58, 127.48, 126.96, 126.53, 126.17 (q,  $J_{(\text{C-F})} = 282.0$  Hz), 123.96, 120.26, 114.43, 112.84, 109.00, 53.03 (q,  $J_{(\text{C-F})} = 31.0$  Hz), 41.16.  $^{19}\text{F}$  NMR (376 MHz,  $\text{CDCl}_3$ )  $\delta$  -72.79. HRMS (ESI) calcd for  $\text{C}_{17}\text{H}_{14}\text{ClF}_3\text{N}_2\text{O}_2\text{S}$   $[\text{M}+\text{Na}]^+$  425.0309, found 425.0317.

***N*-(1-(4-bromo-1-(methylsulfonyl)-1H-indol-2-yl)-2,2,2-trifluoroethyl)aniline 3o**

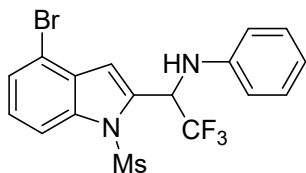

White solid, 44 mg, 72% yield.  $^1\text{H}$  NMR (400 MHz,  $\text{CDCl}_3$ )  $\delta$  7.90 (d,  $J = 8.5$  Hz, 1H), 7.41 (d,  $J = 7.8$  Hz, 1H), 7.15 (dd,  $J = 12.7, 5.5$  Hz, 3H), 6.94 (s, 1H), 6.75 (dd,  $J = 8.1, 2.7$  Hz, 3H), 6.27 (dt,  $J = 13.1, 6.4$  Hz, 1H), 4.06 (d,  $J = 10.8$  Hz, 1H), 3.03 (s, 3H).  $^{13}\text{C}$  NMR (100 MHz,  $\text{CDCl}_3$ )  $\delta$  144.57, 137.00, 135.12, 129.58, 129.30, 127.13, 126.78, 126.15 (q,  $J_{(\text{C-F})} = 281.0$  Hz), 120.25, 115.42, 114.42, 113.38, 110.72, 52.72 (q,  $J_{(\text{C-F})} = 31.0$  Hz), 41.19.  $^{19}\text{F}$  NMR (376 MHz,  $\text{CDCl}_3$ )  $\delta$  -72.77. HRMS (ESI) calcd for  $\text{C}_{17}\text{H}_{14}\text{BrF}_3\text{N}_2\text{O}_2\text{S}$   $[\text{M}+\text{Na}]^+$  468.9803, found 468.9807.

***N*-(2,2,2-trifluoro-1-(5-fluoro-1-(methylsulfonyl)-1H-indol-2-yl)ethyl)aniline 3p**

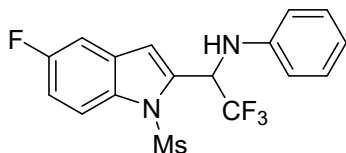

White solid, 22 mg, 58% yield.  $^1\text{H}$  NMR (400 MHz,  $\text{CDCl}_3$ )  $\delta$  7.90 (dd,  $J = 9.4, 4.3$  Hz, 1H), 7.16 (dd,  $J = 15.3, 7.7$  Hz, 3H), 7.04 (dt,  $J = 9.3, 4.5$  Hz, 1H), 6.85 (s, 1H), 6.76 (dd,  $J = 14.3, 7.6$  Hz, 3H), 6.30 – 6.14 (m, 1H), 4.00 (s, 1H), 3.01 (s, 3H).  $^{13}\text{C}$  NMR (100 MHz,  $\text{CDCl}_3$ )  $\delta$  161.11, 158.70, 144.57, 135.94, 133.14, 129.56, 123.38 (q,  $J_{(\text{C-F})} = 281.0$  Hz), 120.24, 115.64 (d,  $J_{(\text{C-F})} = 9.0$  Hz), 114.42, 114.10 (d,  $J_{(\text{C-F})} = 26.0$  Hz), 110.84, 107.17 (d,  $J_{(\text{C-F})} = 24.0$  Hz), 52.79 (q,  $J_{(\text{C-F})} = 31.0$  Hz), 40.92.  $^{19}\text{F}$  NMR (376 MHz,  $\text{CDCl}_3$ )  $\delta$  -72.83, -118.55. HRMS (ESI) calcd for  $\text{C}_{17}\text{H}_{14}\text{F}_4\text{N}_2\text{O}_2\text{S}$   $[\text{M}+\text{Na}]^+$  409.0604, found 409.0606.

***N*-(1-(5-chloro-1-(methylsulfonyl)-1H-indol-2-yl)-2,2,2-trifluoroethyl)aniline 3q**

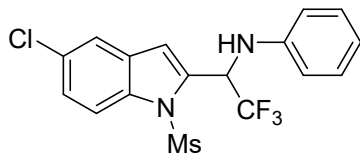

White solid, 29 mg, 73% yield.  $^1\text{H}$  NMR (400 MHz,  $\text{CDCl}_3$ )  $\delta$  7.87 (d,  $J = 9.0$  Hz, 1H), 7.49 (d,  $J = 2.1$  Hz, 1H), 7.32 – 7.21 (m, 1H), 7.15 (dd,  $J = 15.3, 7.4$  Hz, 2H), 6.86 – 6.63 (m, 4H), 6.24 (q,  $J = 6.4$  Hz, 1H), 4.01 (s, 1H), 3.02 (s, 3H).  $^{13}\text{C}$  NMR (100 MHz,  $\text{CDCl}_3$ )  $\delta$  144.52, 135.65, 135.15, 130.02, 129.71, 129.57, 126.12, 126.17 (q,  $J_{(\text{C-F})} = 282.0$  Hz), 121.14, 120.29, 115.44, 114.44, 110.30, 52.76 (q,  $J_{(\text{C-F})} = 31.0$  Hz), 41.07.  $^{19}\text{F}$  NMR (376 MHz,  $\text{CDCl}_3$ )  $\delta$  -72.77. HRMS (ESI) calcd for  $\text{C}_{17}\text{H}_{14}\text{ClF}_3\text{N}_2\text{O}_2\text{S}$   $[\text{M}+\text{Na}]^+$  425.0309, found 425.0312.

***N*-(1-(6-chloro-1-(methylsulfonyl)-1H-indol-2-yl)-2,2,2-trifluoroethyl)aniline 3r**

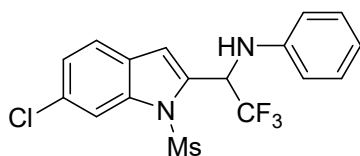

White solid, 25 mg, 63% yield.  $^1\text{H}$  NMR (400 MHz,  $\text{CDCl}_3$ )  $\delta$  7.96 (s, 1H), 7.41 (d,  $J = 8.4$  Hz, 1H), 7.24 – 7.06 (m, 3H), 6.84 (s, 1H), 6.74 (t,  $J = 7.6$  Hz, 3H), 6.22 (t,  $J = 7.3$  Hz, 1H), 4.11 – 3.91 (m, 1H), 3.03 (s, 3H).  $^{13}\text{C}$  NMR (100 MHz,  $\text{CDCl}_3$ )  $\delta$  144.57, 137.13, 134.90, 131.98, 129.57, 126.99, 126.23 (q,  $J_{(C-F)} = 282.0$  Hz), 124.93, 122.36, 120.26, 114.59, 114.44, 110.65, 53.08 (q,  $J_{(C-F)} = 31.0$  Hz), 41.15.  $^{19}\text{F}$  NMR (376 MHz,  $\text{CDCl}_3$ )  $\delta$  -72.74. HRMS (ESI) calcd for  $\text{C}_{17}\text{H}_{14}\text{ClF}_3\text{N}_2\text{O}_2\text{S}$   $[\text{M}+\text{Na}]^+$  425.0309, found 425.0306.

***N*-(1-(6-bromo-1-(methylsulfonyl)-1H-indol-2-yl)-2,2,2-trifluoroethyl)aniline 3s**

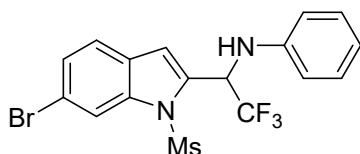

White solid, 30 mg, 68% yield.  $^1\text{H}$  NMR (400 MHz,  $\text{CDCl}_3$ )  $\delta$  8.12 (s, 1H), 7.36 (s, 2H), 7.13 (d,  $J = 7.8$  Hz, 2H), 6.84 (s, 1H), 6.74 (t,  $J = 8.3$  Hz, 3H), 6.22 (d,  $J = 6.9$  Hz, 1H), 4.03 (d,  $J = 13.4$  Hz, 1H), 3.04 (s, 3H).  $^{13}\text{C}$  NMR (100 MHz,  $\text{CDCl}_3$ )  $\delta$  144.55, 137.43, 134.83, 129.56, 127.62, 127.34, 126.19 (q,  $J_{(C-F)} = 282.0$  Hz), 122.66, 120.27, 119.68, 117.43, 114.44, 110.68, 52.77 (q,  $J_{(C-F)} = 31.0$  Hz), 41.20.  $^{19}\text{F}$  NMR (376 MHz,  $\text{CDCl}_3$ )  $\delta$  -72.76. HRMS (ESI) calcd for  $\text{C}_{17}\text{H}_{14}\text{BrF}_3\text{N}_2\text{O}_2\text{S}$   $[\text{M}+\text{Na}]^+$  468.9803, found 468.9809.

***N*-(2,2,2-trifluoro-1-(7-fluoro-1H-indol-2-yl)ethyl)aniline 3t**

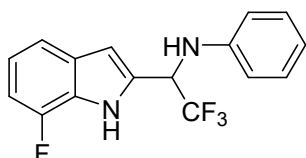

White solid, 14 mg, 49% yield.  $^1\text{H}$  NMR (400 MHz,  $\text{CDCl}_3$ )  $\delta$  8.50 (s, 1H), 7.29 (d,  $J = 8.0$  Hz, 1H), 7.14 (t,  $J = 7.8$  Hz, 2H), 6.96 (td,  $J = 7.9, 4.7$  Hz, 1H), 6.82 (dq,  $J = 21.1, 7.6$  Hz, 2H), 6.69 – 6.59 (m, 3H), 5.13 (q,  $J = 7.0$  Hz, 1H), 4.23 (t,  $J = 6.7$  Hz, 1H).  $^{13}\text{C}$  NMR (100 MHz,  $\text{CDCl}_3$ )  $\delta$  150.57 (d,  $J_{(C-F)} = 243.0$  Hz), 145.35, 131.61 (d,  $J_{(C-F)} = 5.0$  Hz), 131.28, 129.59, 125.88 (q,  $J_{(C-F)} = 281.0$  Hz), 124.63 (d,  $J_{(C-F)} = 13.0$  Hz), 120.65 (d,  $J_{(C-F)} = 6.0$  Hz), 120.26, 116.62 (d,  $J_{(C-F)} = 4.0$  Hz), 114.20, 107.70 (d,  $J_{(C-F)} = 16.0$  Hz), 103.59, 56.05 (q,  $J_{(C-F)} = 31.0$  Hz).  $^{19}\text{F}$  NMR (376 MHz,  $\text{CDCl}_3$ )  $\delta$  -73.99 (d,  $J_{(C-F)} = 7.5$  Hz) -134.71 – -134.76 (m). HRMS (ESI) calcd for  $\text{C}_{16}\text{H}_{12}\text{F}_4\text{N}_2$   $[\text{M}+\text{Na}]^+$  309.1010, found 309.1008.

***N*-(2,2,2-trifluoro-1-(5-methyl-1-(methylsulfonyl)-1H-indol-2-yl)ethyl)aniline 3u**

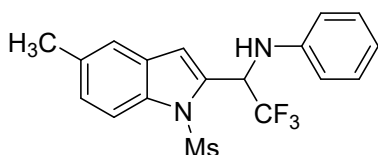

White solid, 21 mg, 56% yield.  $^1\text{H}$  NMR (400 MHz,  $\text{CDCl}_3$ )  $\delta$  7.78 (d,  $J = 8.7$  Hz, 1H), 7.27 (s, 1H), 7.11 (t,  $J = 7.3$  Hz, 3H), 6.86 – 6.63 (m, 4H), 6.22 (t,  $J = 6.9$  Hz, 1H), 4.01 (s, 1H), 2.93 (s, 3H), 2.34 (s, 3H).  $^{13}\text{C}$  NMR (100 MHz,  $\text{CDCl}_3$ )  $\delta$  144.83, 135.16, 134.34, 134.01, 129.52, 128.91, 127.35, 126.35 (q,  $J_{(C-F)} = 281.0$  Hz), 121.45, 120.05, 114.44, 114.08, 111.13, 53.09 (q,  $J_{(C-F)} = 31.0$  Hz), 40.52, 21.18.  $^{19}\text{F}$  NMR (376 MHz,  $\text{CDCl}_3$ )  $\delta$  -72.92. HRMS (ESI)

calcd for C<sub>18</sub>H<sub>17</sub>F<sub>3</sub>N<sub>2</sub>O<sub>2</sub>S [M+Na]<sup>+</sup> 405.0855, found 405.0860.

***N*-(2,2,2-trifluoro-1-(7-methyl-1-(methylsulfonyl)-1H-indol-2-yl)ethyl)aniline 3v**

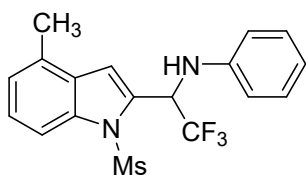

White solid, 26 mg, 67% yield. <sup>1</sup>H NMR (400 MHz, CDCl<sub>3</sub>) δ 7.75 (d, *J* = 8.5 Hz, 1H), 7.20 (t, *J* = 7.9 Hz, 1H), 7.13 (t, *J* = 7.9 Hz, 2H), 7.03 (d, *J* = 7.4 Hz, 1H), 6.89 (s, 1H), 6.73 (d, *J* = 7.7 Hz, 3H), 6.28 (q, *J* = 7.5, 6.7 Hz, 1H), 4.04 (s, 1H), 2.97 (s, 3H), 2.44 (s, 3H). <sup>13</sup>C NMR (100 MHz, CDCl<sub>3</sub>) δ 144.82, 136.75, 133.79, 131.27, 129.52, 128.27, 126.00, 124.58, 120.03, 114.38, 111.84, 109.54, 52.75 (q, *J*<sub>(C-F)</sub> = 31.0 Hz), 40.67, 18.41. <sup>19</sup>F NMR (376 MHz, CDCl<sub>3</sub>) δ -72.92. HRMS (ESI) calcd for C<sub>18</sub>H<sub>17</sub>F<sub>3</sub>N<sub>2</sub>O<sub>2</sub>S [M+Na]<sup>+</sup> 405.0855, found 405.0857.

***N*-(2,2,2-trifluoro-1-(5-methoxy-1-(methylsulfonyl)-1H-indol-2-yl)ethyl)aniline 3x**

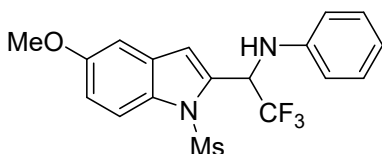

White solid, 28 mg, 69% yield. <sup>1</sup>H NMR (400 MHz, CDCl<sub>3</sub>) δ 7.81 (d, *J* = 9.0 Hz, 1H), 7.12 (t, *J* = 7.8 Hz, 2H), 6.97 – 6.85 (m, 2H), 6.81 (s, 1H), 6.74 (t, *J* = 7.8 Hz, 3H), 6.22 (t, *J* = 7.3 Hz, 1H), 4.02 (d, *J* = 8.8 Hz, 1H), 3.75 (s, 3H), 2.93 (s, 3H). <sup>13</sup>C NMR (100 MHz, CDCl<sub>3</sub>) δ 156.96, 144.78, 134.91, 131.49, 129.65, 129.52, 126.31 (q, *J*<sub>(C-F)</sub> = 282.0 Hz), 120.07, 115.35, 115.06, 114.41, 111.32, 103.69, 55.73, 53.08 (q, *J*<sub>(C-F)</sub> = 31.0 Hz), 40.50. <sup>19</sup>F NMR (376 MHz, CDCl<sub>3</sub>) δ -72.95. HRMS (ESI) calcd for C<sub>18</sub>H<sub>17</sub>F<sub>3</sub>N<sub>2</sub>O<sub>3</sub>S [M+Na]<sup>+</sup> 421.0804, found 421.0803.

***(E)*-2,2,2-trifluoro-*N*-(4-fluorophenyl)-1-(1-(methylsulfonyl)indolin-2-yl)ethan-1-imine 5**

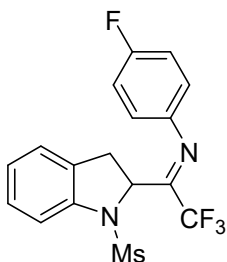

White solid, 14 mg, 36% yield. <sup>1</sup>H NMR (400 MHz, CDCl<sub>3</sub>) δ 7.21 (d, *J* = 8.1 Hz, 1H), 7.15 – 7.06 (m, 2H), 7.00 – 6.89 (m, 3H), 6.69 (dd, *J* = 8.7, 4.7 Hz, 2H), 4.93 (dd, *J* = 11.8, 7.3 Hz, 1H), 3.41 (dd, *J* = 16.5, 11.7 Hz, 1H), 3.19 (dd, *J* = 16.5, 7.2 Hz, 1H), 2.63 (s, 3H). <sup>13</sup>C NMR (100 MHz, CDCl<sub>3</sub>) δ 161.44, 159.01, 158.67 (q, *J*<sub>(C-F)</sub> = 31.0 Hz), 142.93 (d, *J*<sub>(C-F)</sub> = 3.0 Hz), 141.02, 128.70, 128.07, 125.30, 124.73, 119.50 (d, *J*<sub>(C-F)</sub> = 8.0 Hz), 116.20 (d, *J*<sub>(C-F)</sub> = 23.0 Hz), 114.23, 58.31, 35.11, 34.46. <sup>19</sup>F NMR (376 MHz, CDCl<sub>3</sub>) δ -61.32, -67.28, -118.22. HRMS (ESI) calcd for C<sub>17</sub>H<sub>14</sub>F<sub>4</sub>N<sub>2</sub>O<sub>2</sub>S [M+Na]<sup>+</sup> 409.061, found 409.058.

## 7) Reference

- (1) Cui, J.-H.; Chen, Q.-Y.; Zhang, J.; He, Y.; Li, X.; Liu, P. N. Visible light-induced cascade annulation of sulfoxonium ylides with azides for the synthesis of 2-trifluoromethyl indoles. *Chem. Commun.* 2025, 61, 488-491.
- (2) Zhang, X. K.; Pan, Y.; Liang, P.; Pang, L.; Ma, X. F.; Jiao, W.; Shao, H. W. An Effective

Method for the Synthesis of 1,3-Dihydro 2Hindazoles via N-N Bond Formation. *Adv. Synth. Catal.* 2019, 361, 5552-5557.

**8) NMR spectra**

Figure S1 <sup>1</sup>HNMR spectra of compound **3a**

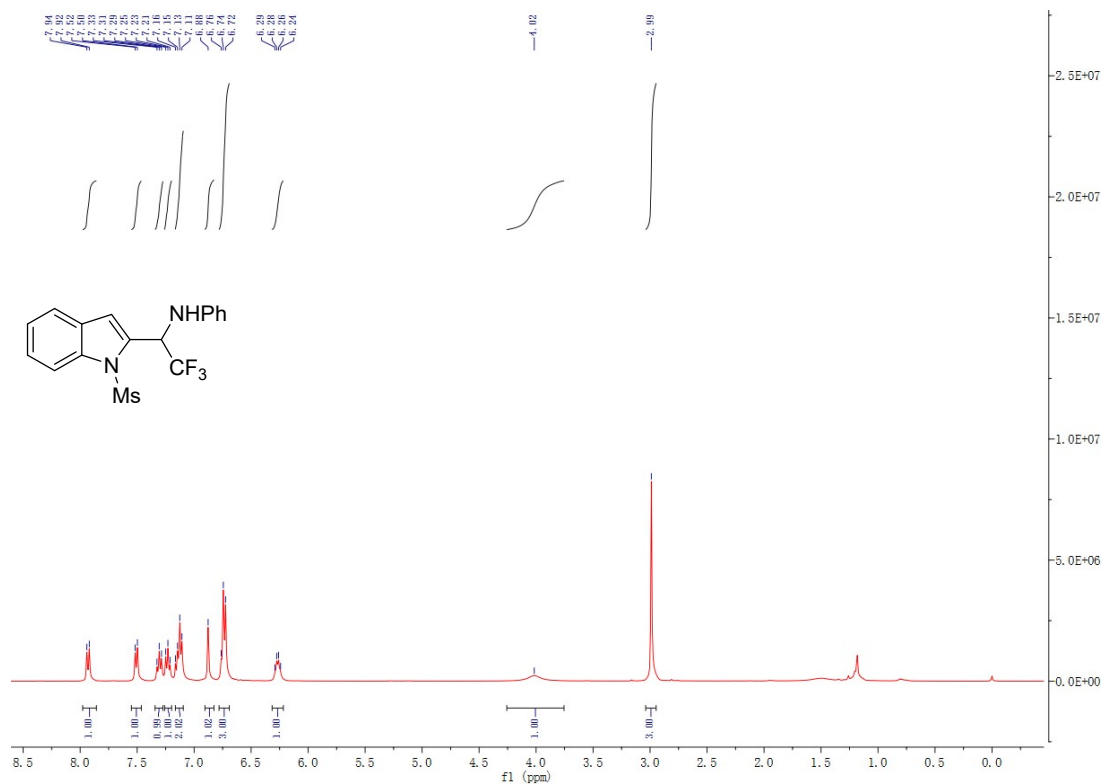

Figure S2 <sup>13</sup>CNMR spectra of compound **3a**

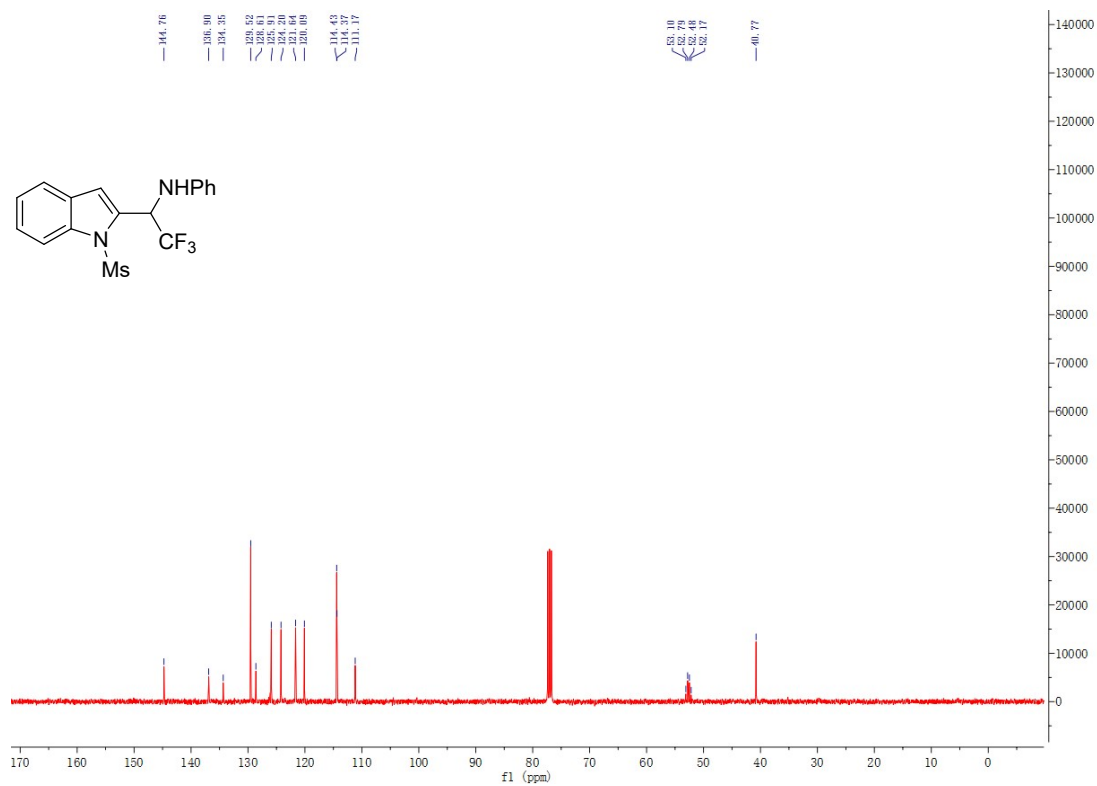

Figure S3  $^{19}\text{F}$ NMR spectra of compound **3a**

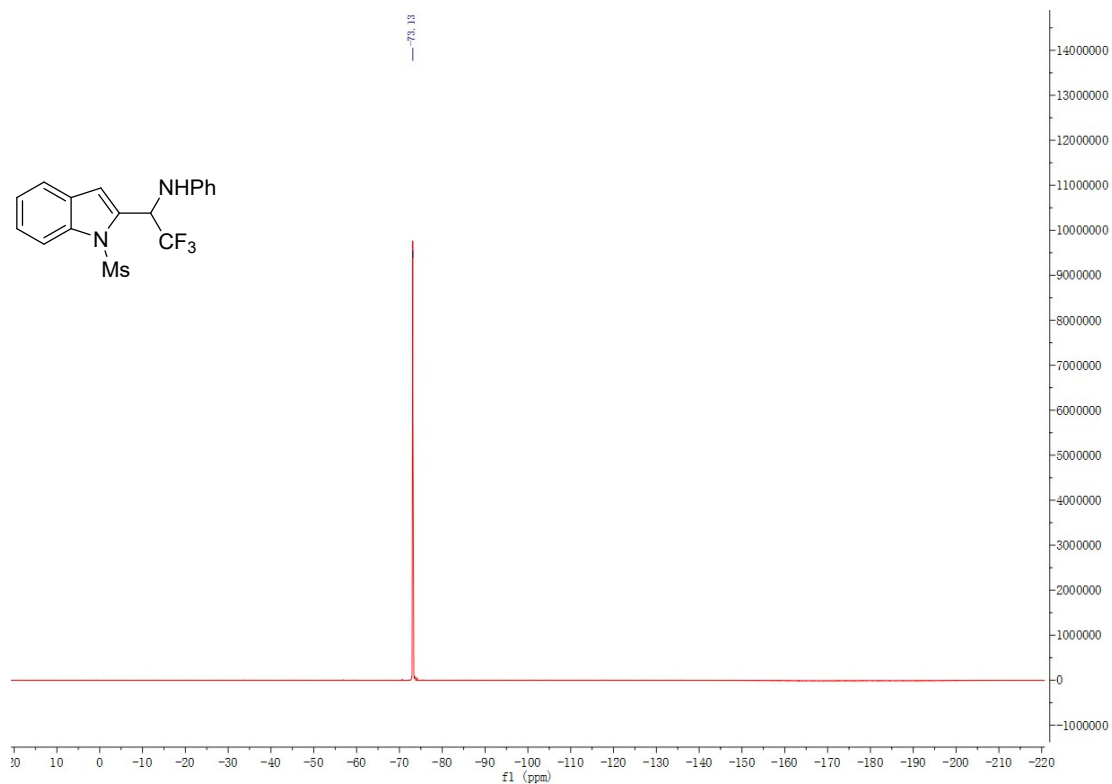

Figure S4  $^1\text{H}$ NMR spectra of compound **3b**

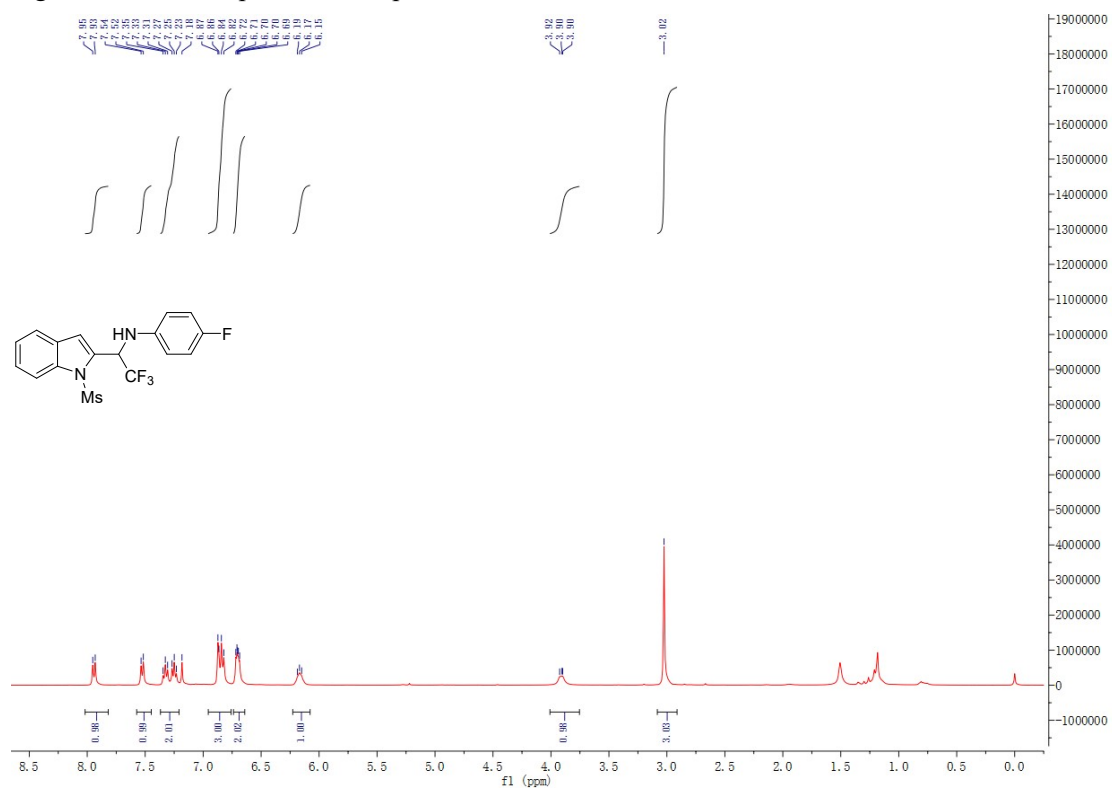

Figure S5 <sup>13</sup>CNMR spectra of compound **3b**

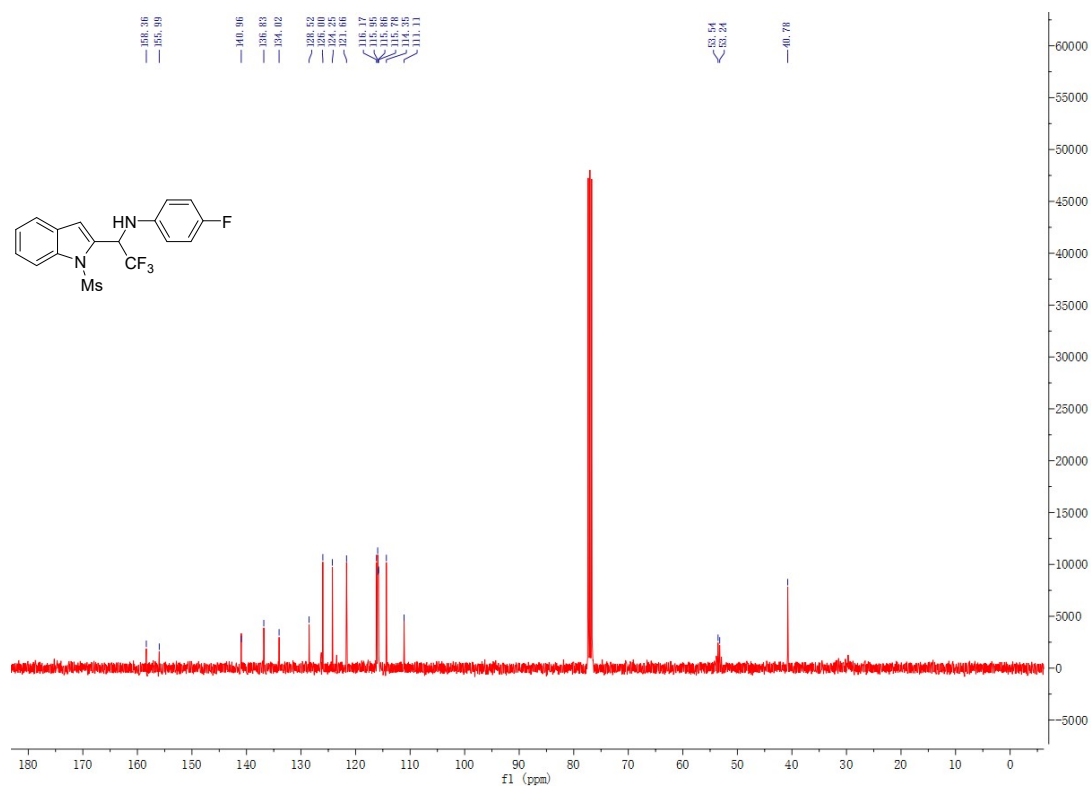

Figure S6 <sup>19</sup>FNMR spectra of compound **3b**

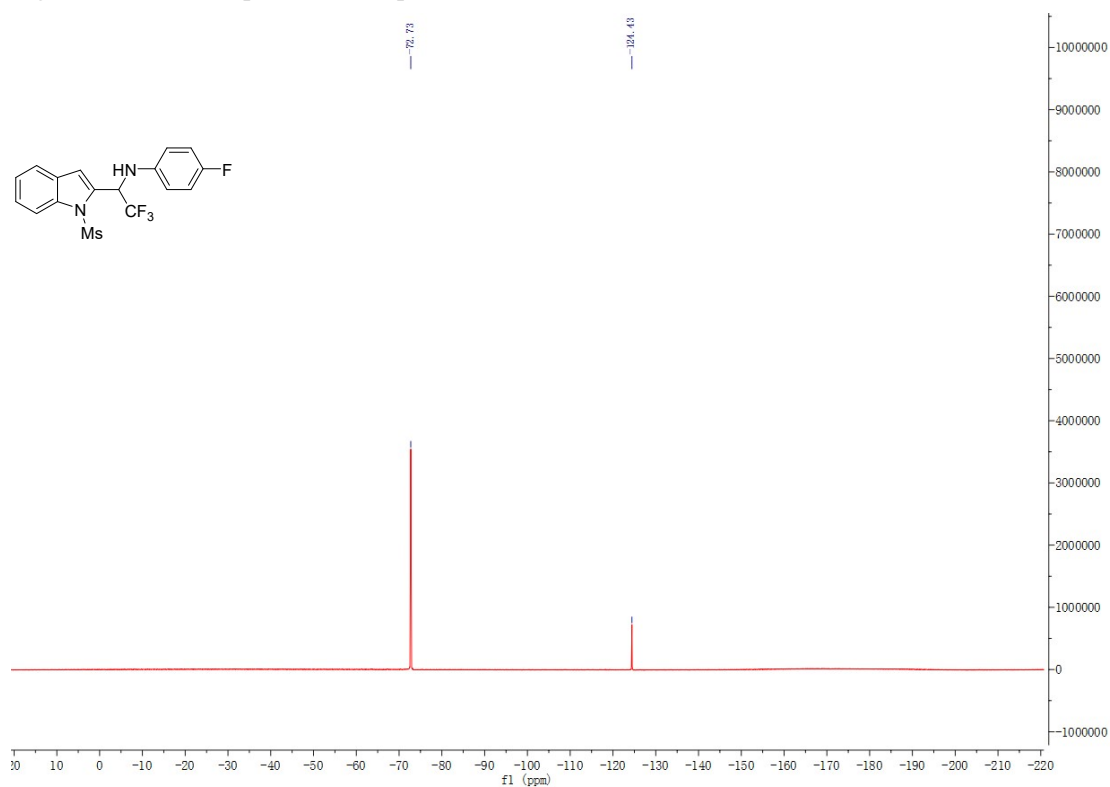

Figure S7 <sup>1</sup>HNMR spectra of compound 3c

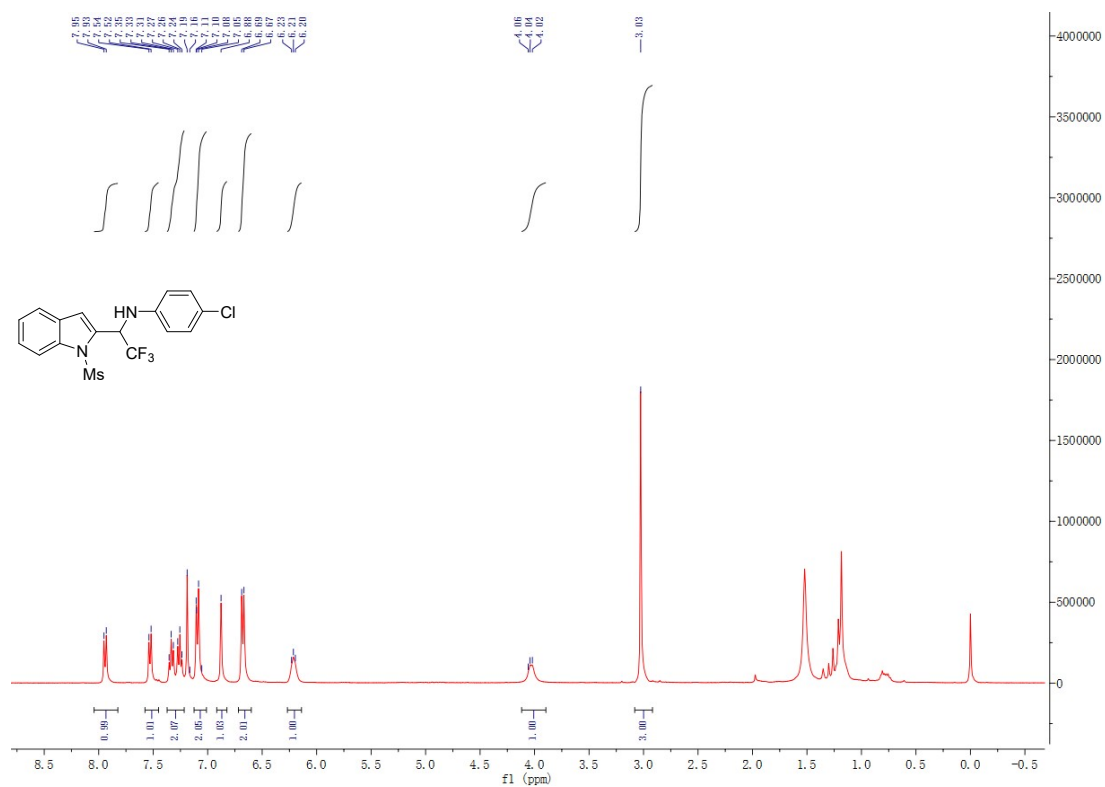

Figure S8 <sup>13</sup>CNMR spectra of compound 3c

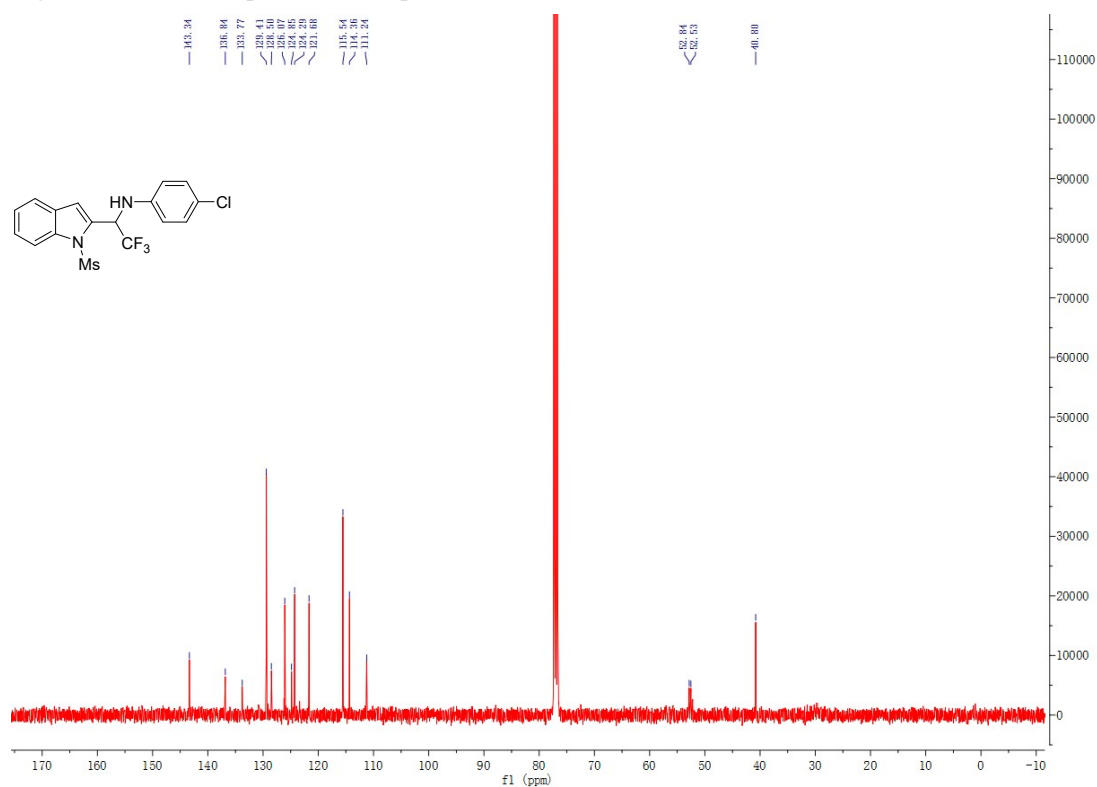

Figure S9  $^{19}\text{F}$ NMR spectra of compound **3c**

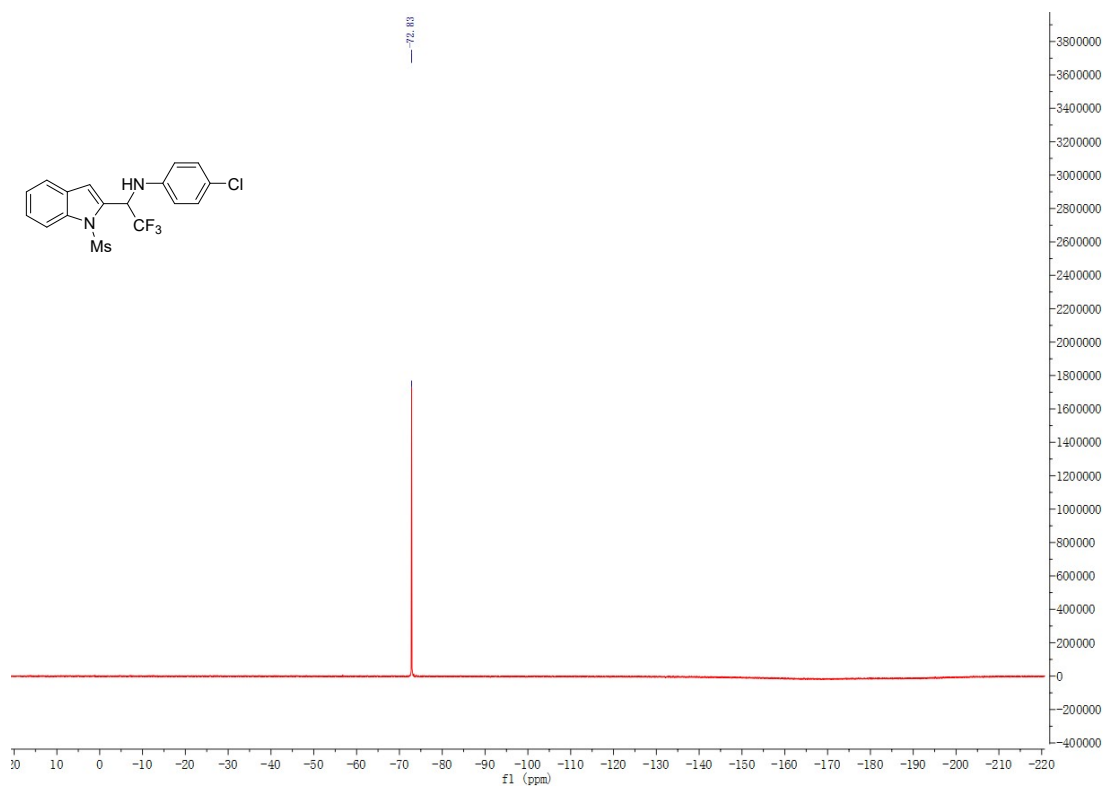

Figure S10  $^1\text{H}$ NMR spectra of compound **3d**

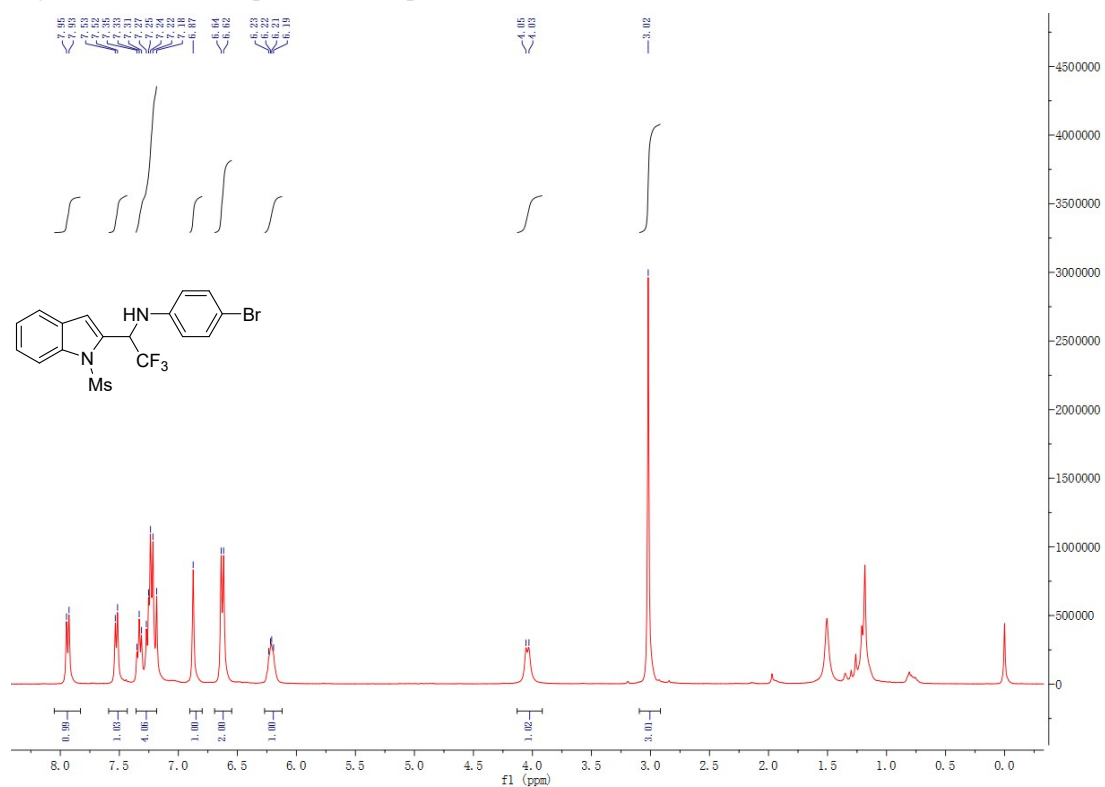

Figure S11  $^{13}\text{C}$ NMR spectra of compound **3d**

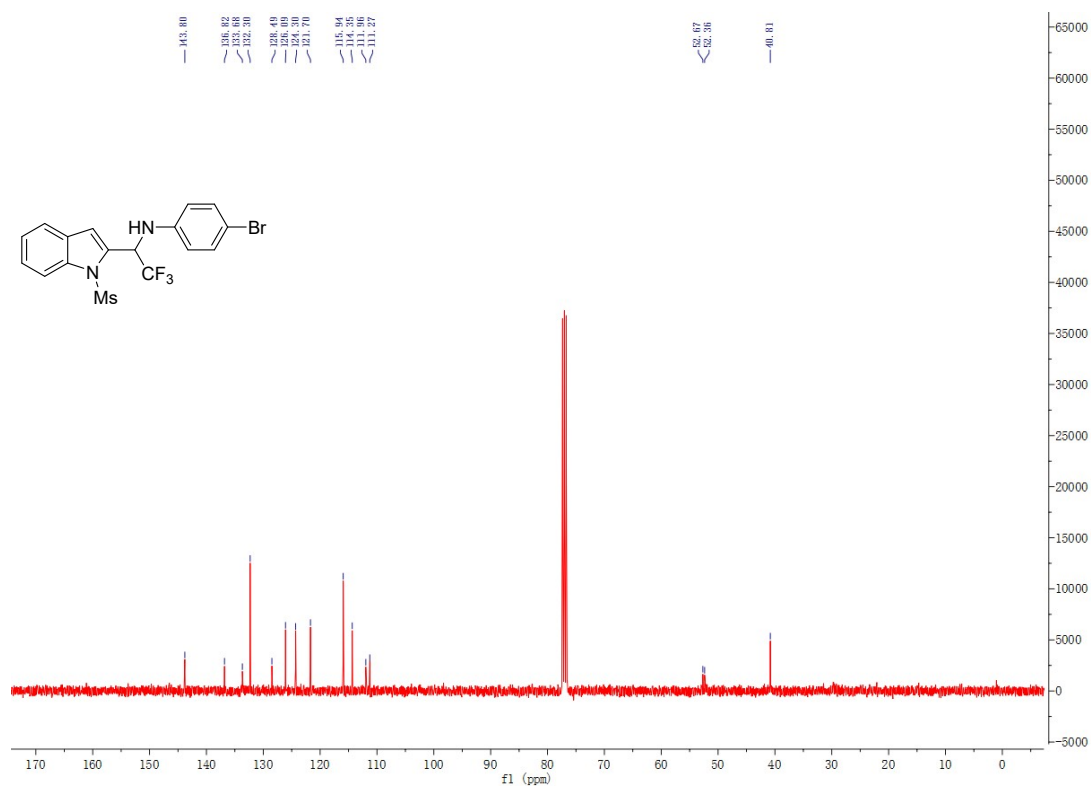

Figure S12  $^{19}\text{F}$ NMR spectra of compound **3d**

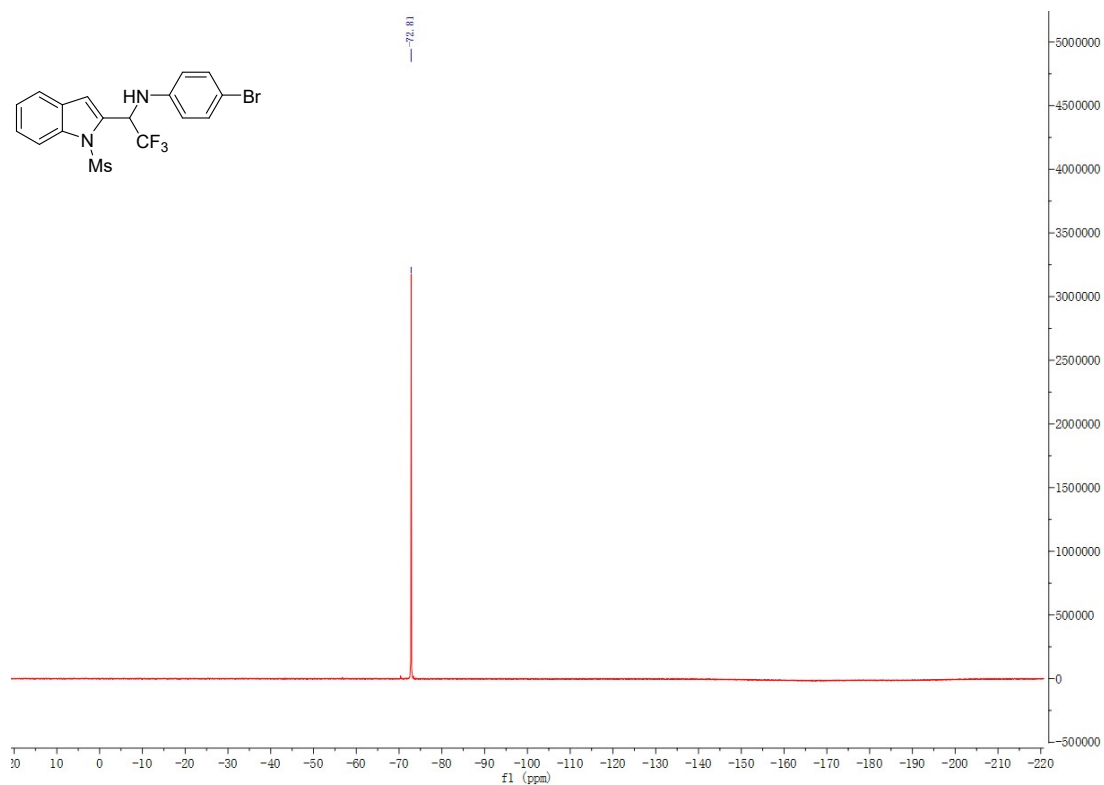

Figure S13 <sup>1</sup>H NMR spectra of compound **3e**

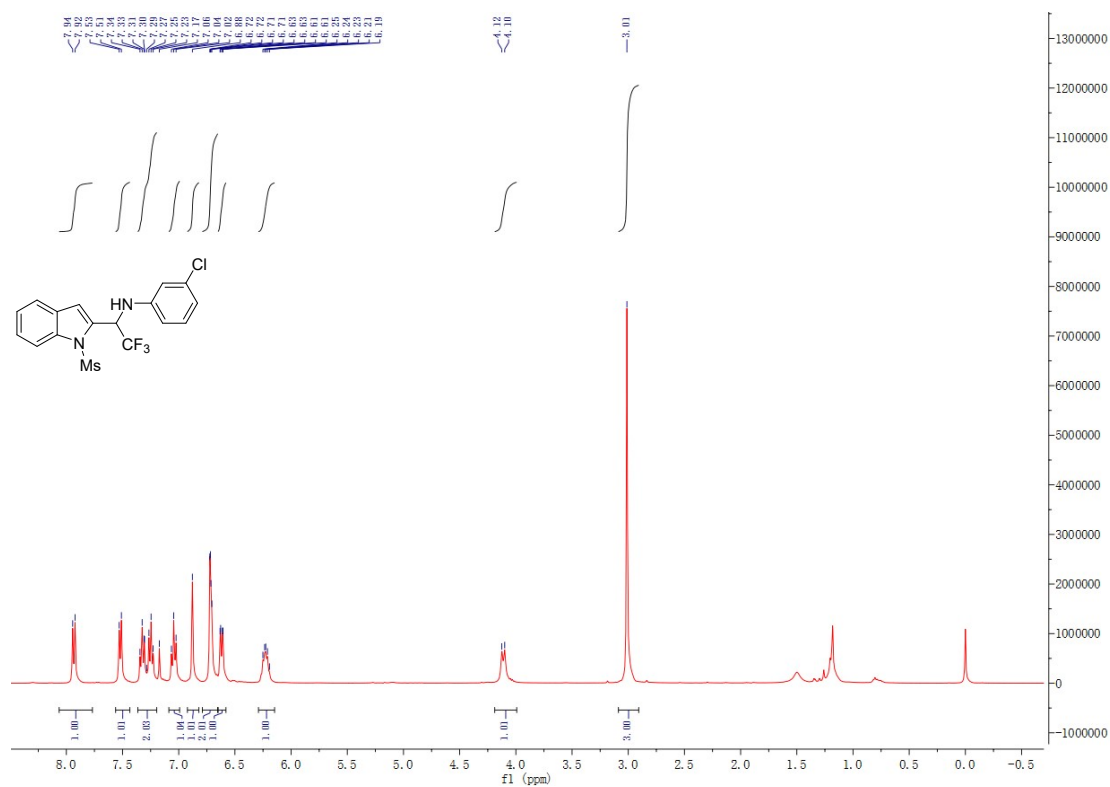

Figure S14 <sup>13</sup>C NMR spectra of compound **3e**

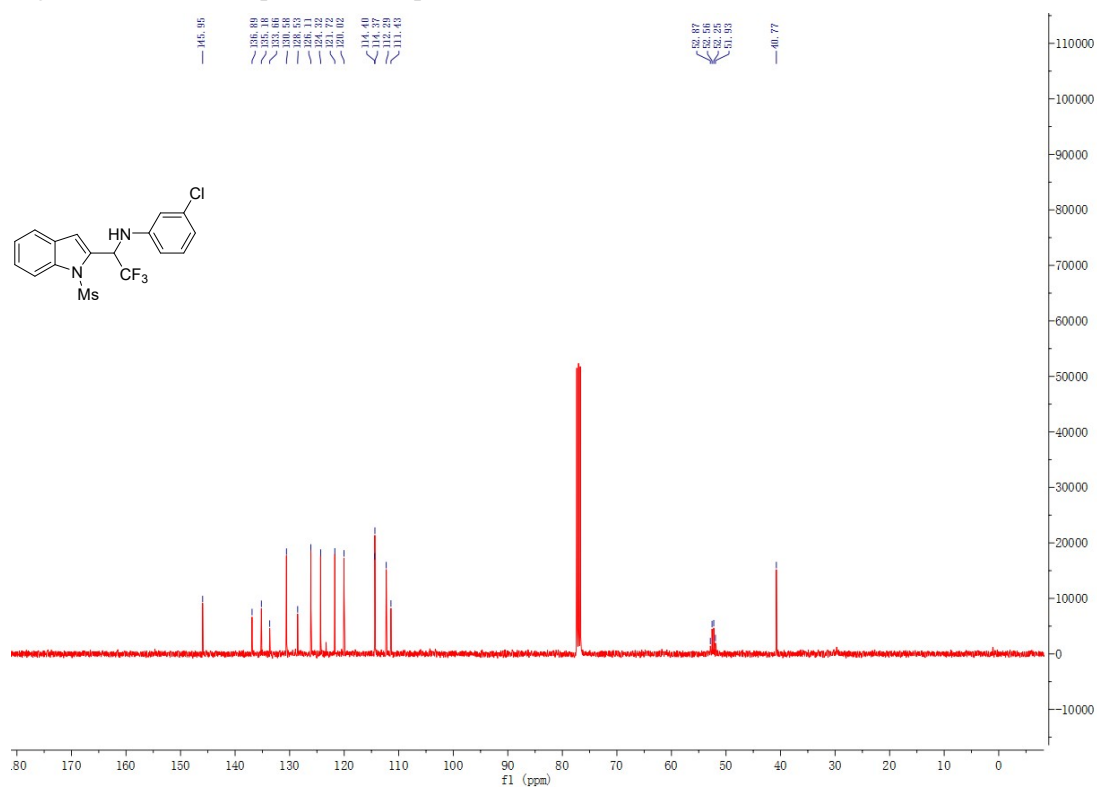

Figure S15  $^{19}\text{F}$ NMR spectra of compound **3e**

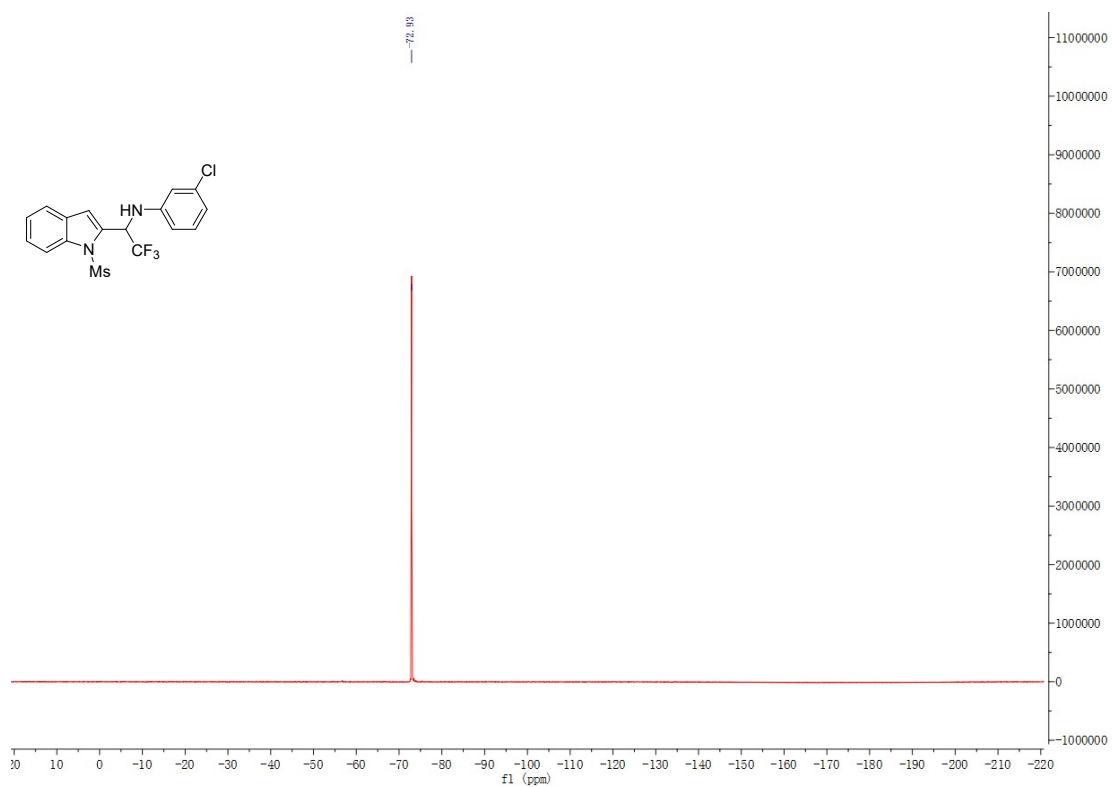

Figure S16  $^1\text{H}$ NMR spectra of compound **3f**

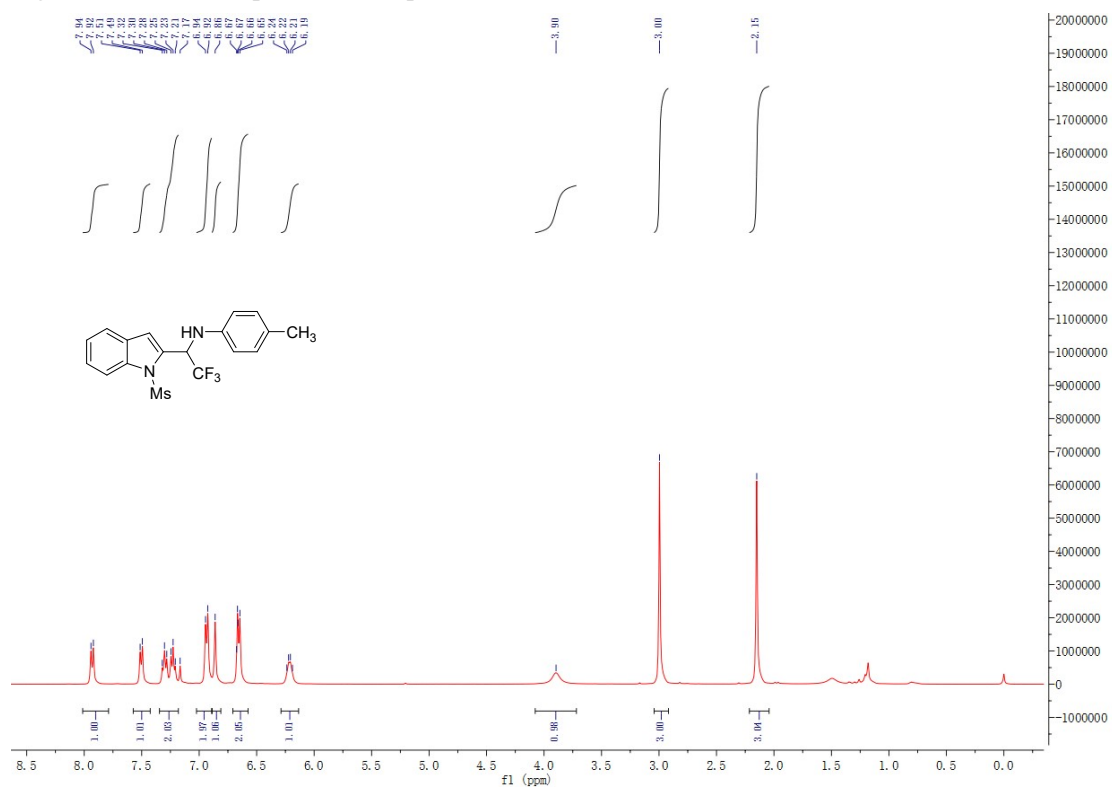

Figure S17  $^{13}\text{C}$ NMR spectra of compound **3f**

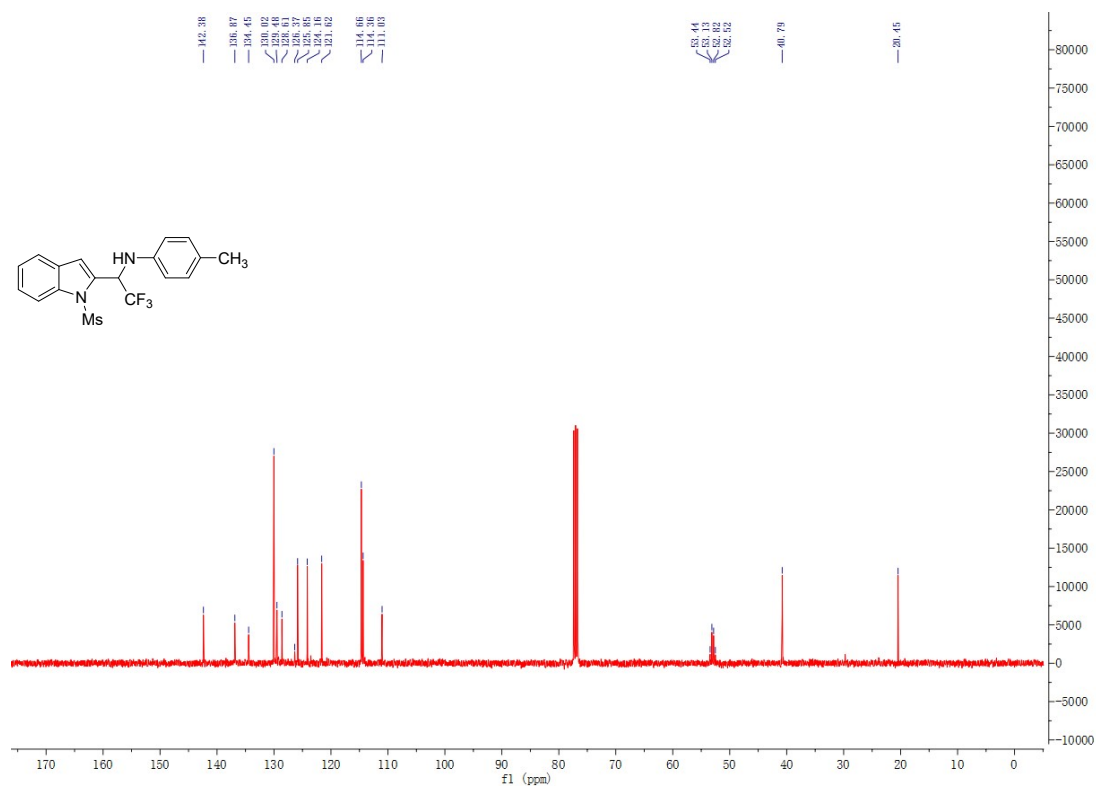

Figure S18  $^{19}\text{F}$ NMR spectra of compound **3f**

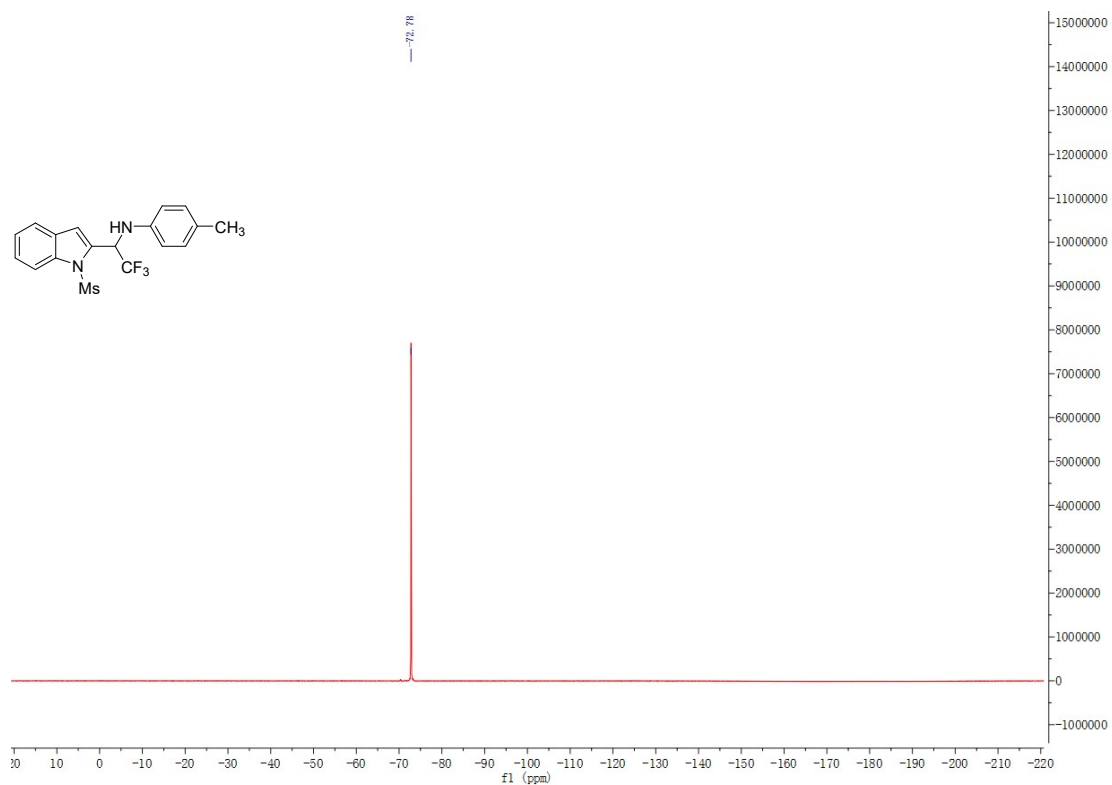

Figure S19 <sup>1</sup>H NMR spectra of compound **3g**

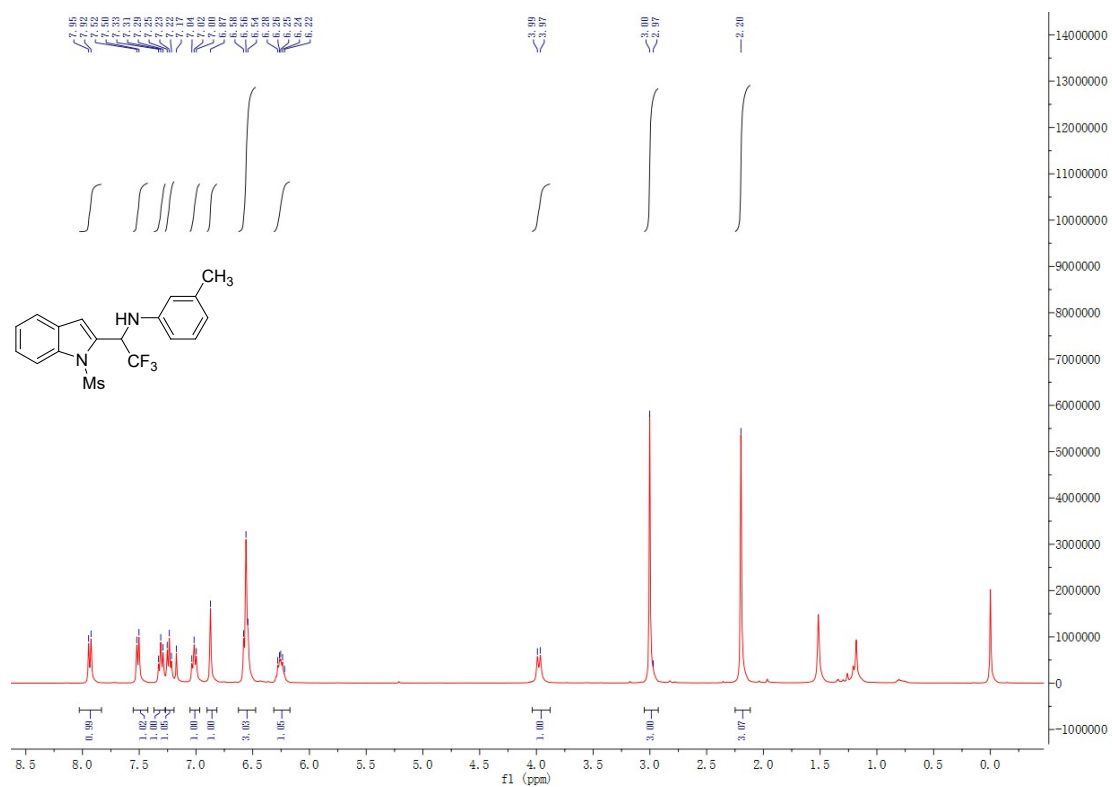

Figure S20 <sup>13</sup>C NMR spectra of compound **3g**

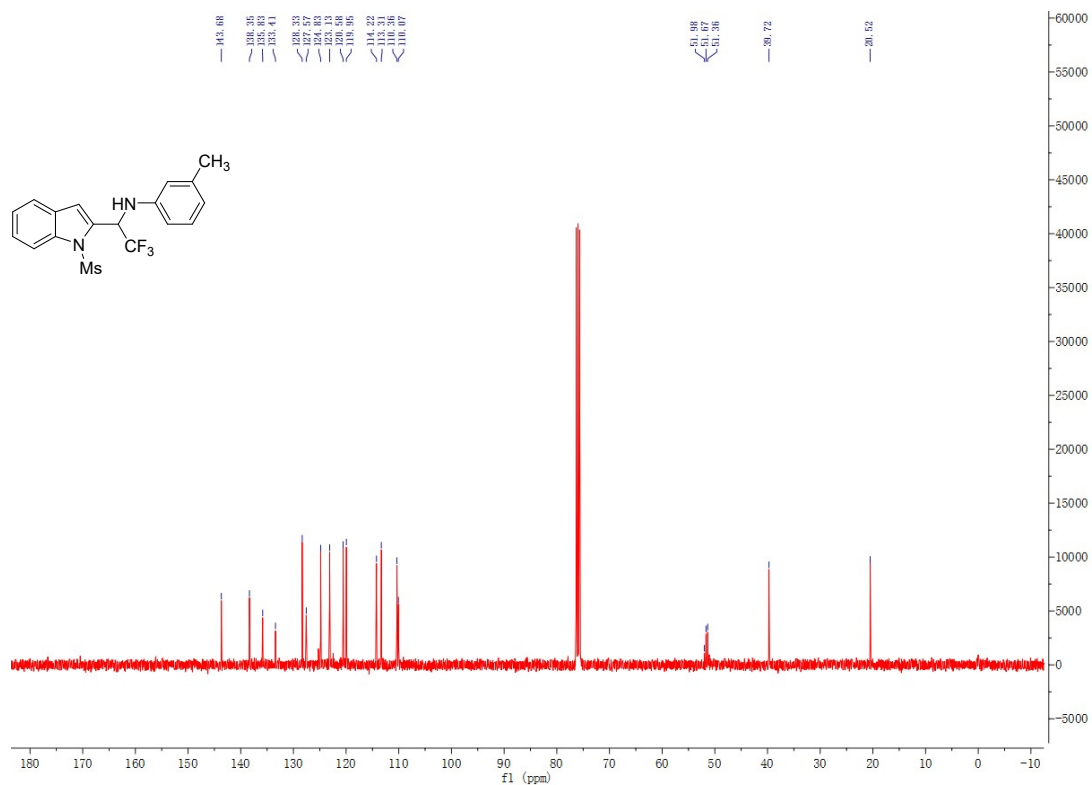

Figure S21  $^{19}\text{F}$ NMR spectra of compound **3g**

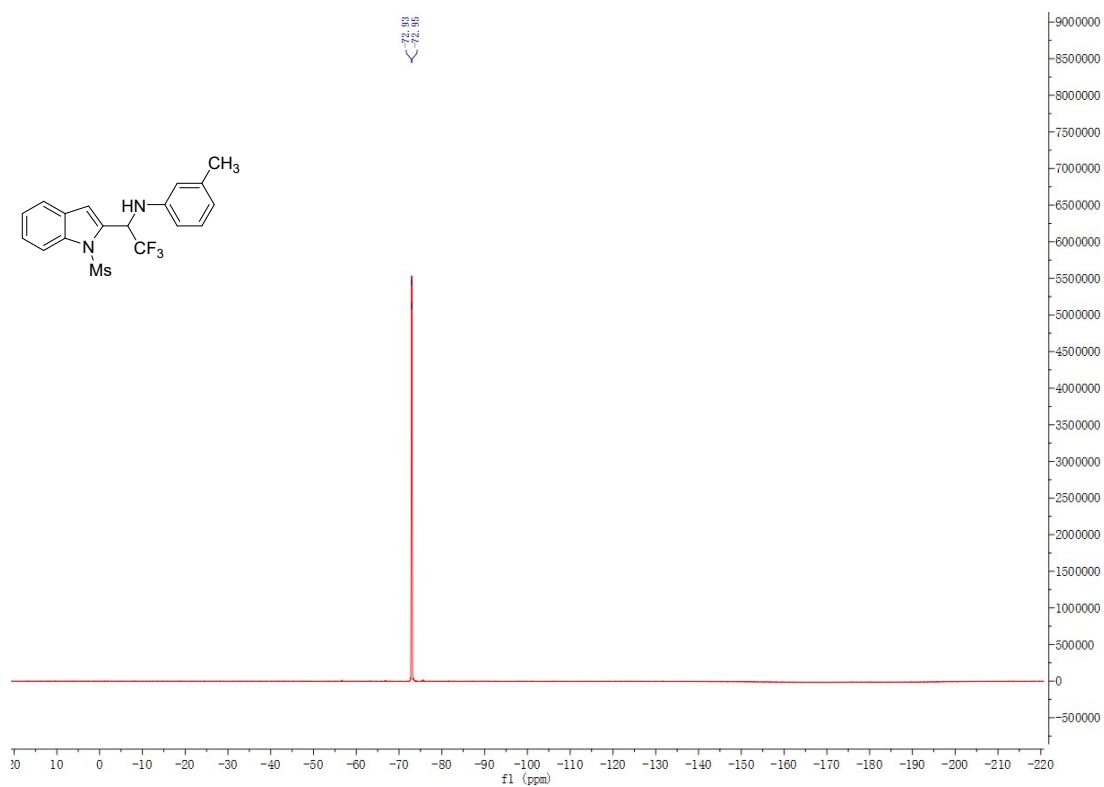

Figure S22  $^1\text{H}$ NMR spectra of compound **3h**

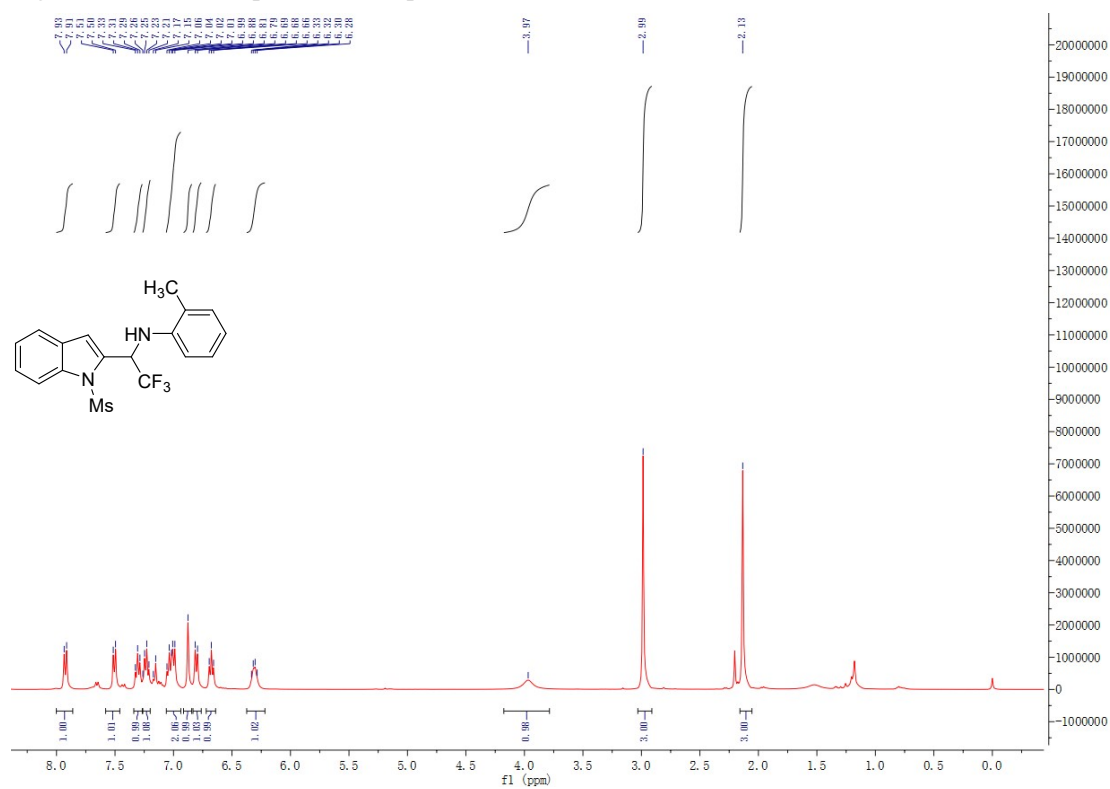

Figure S23 <sup>13</sup>CNMR spectra of compound **3h**

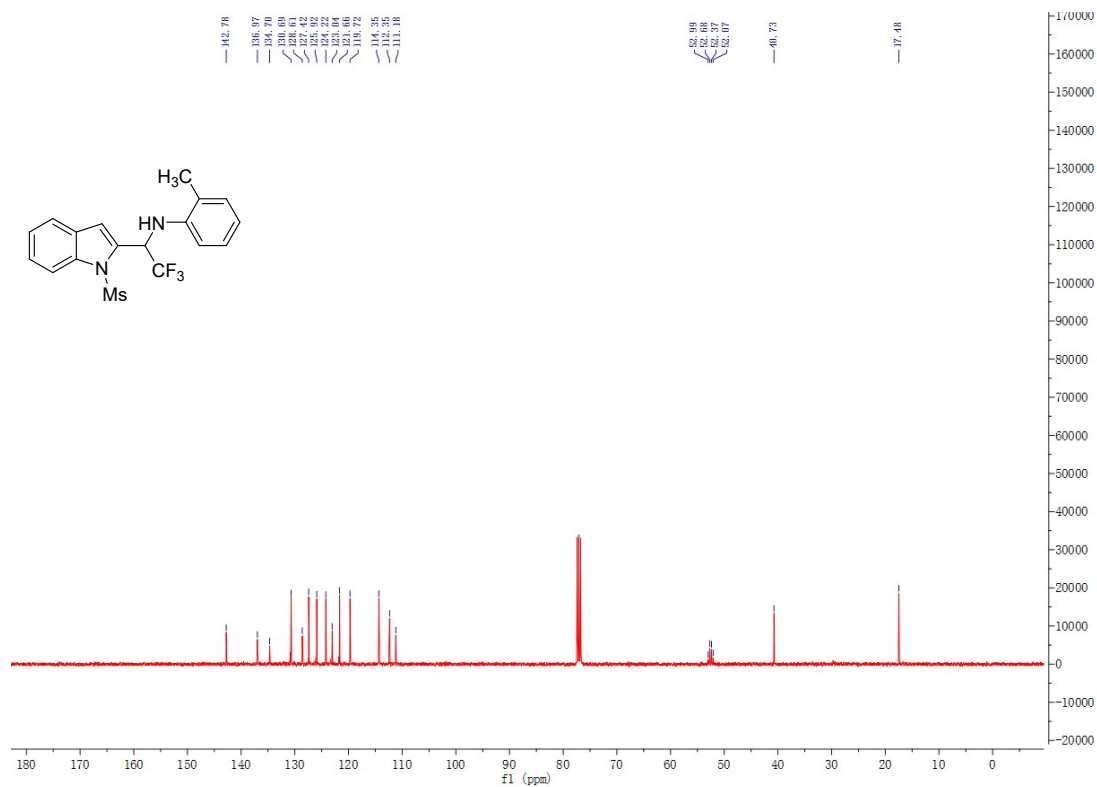

Figure S24 <sup>19</sup>FNMR spectra of compound **3h**

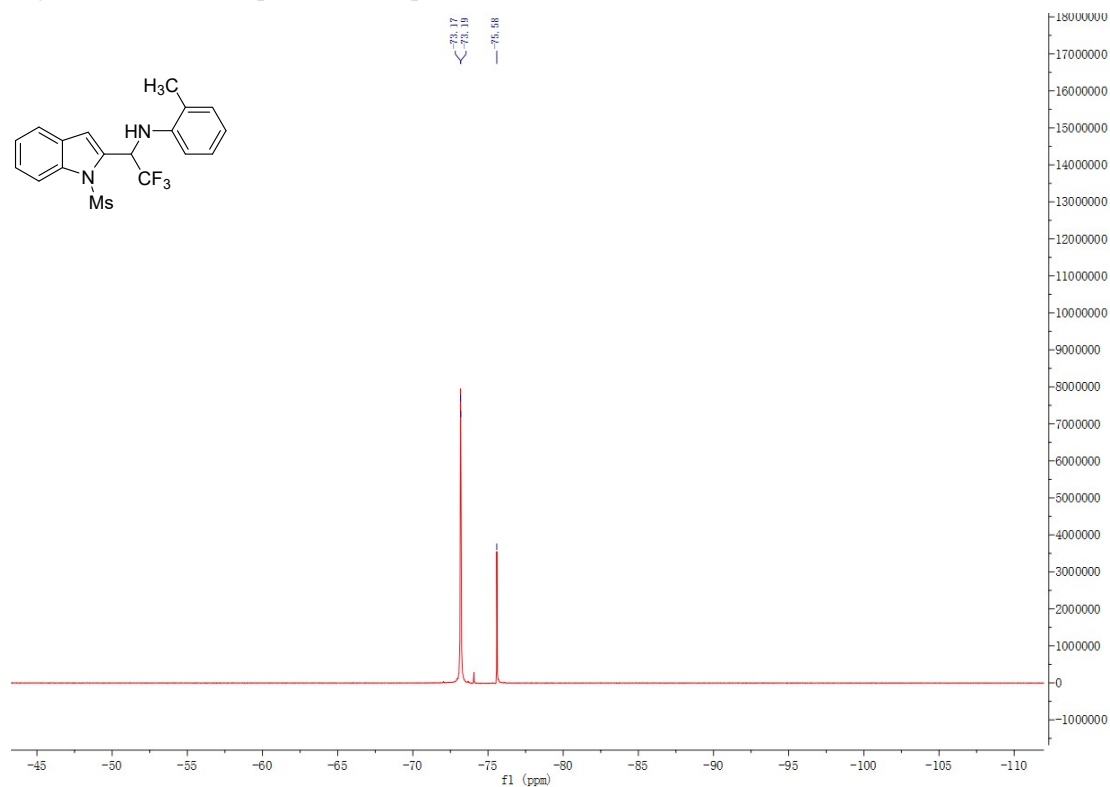



Figure S27  $^{19}\text{F}$ NMR spectra of compound **3i**

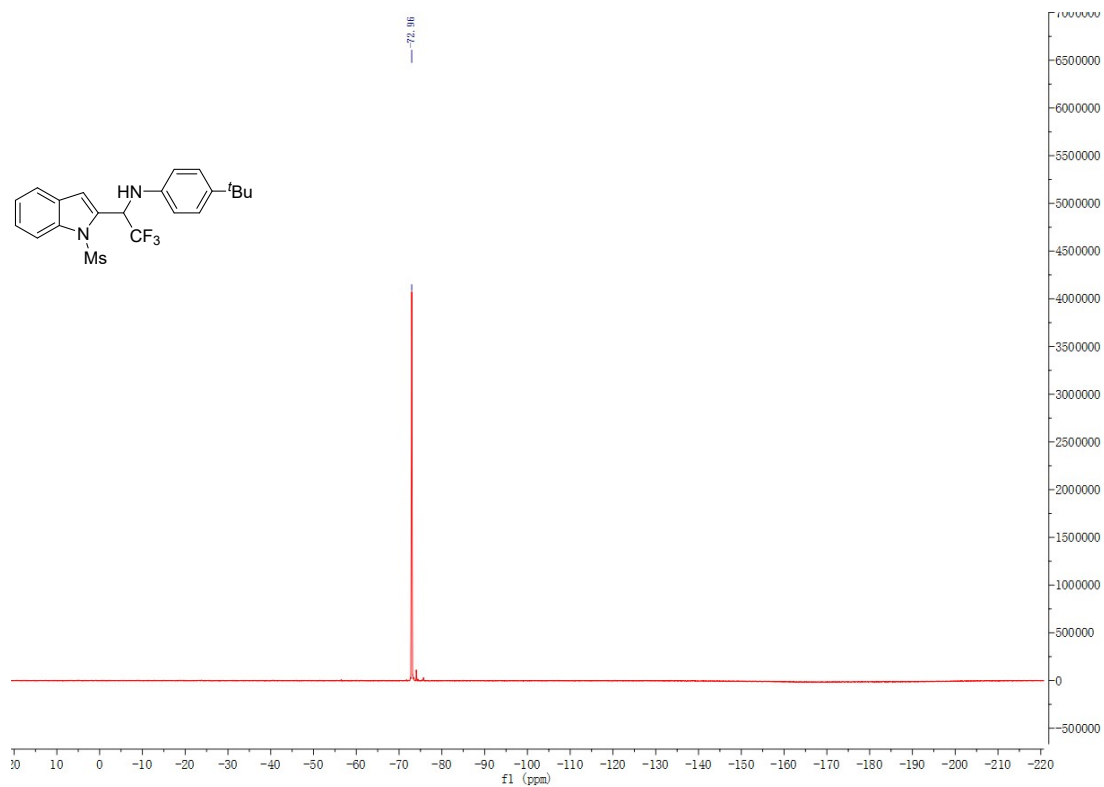

Figure S28  $^1\text{H}$ NMR spectra of compound **3j**

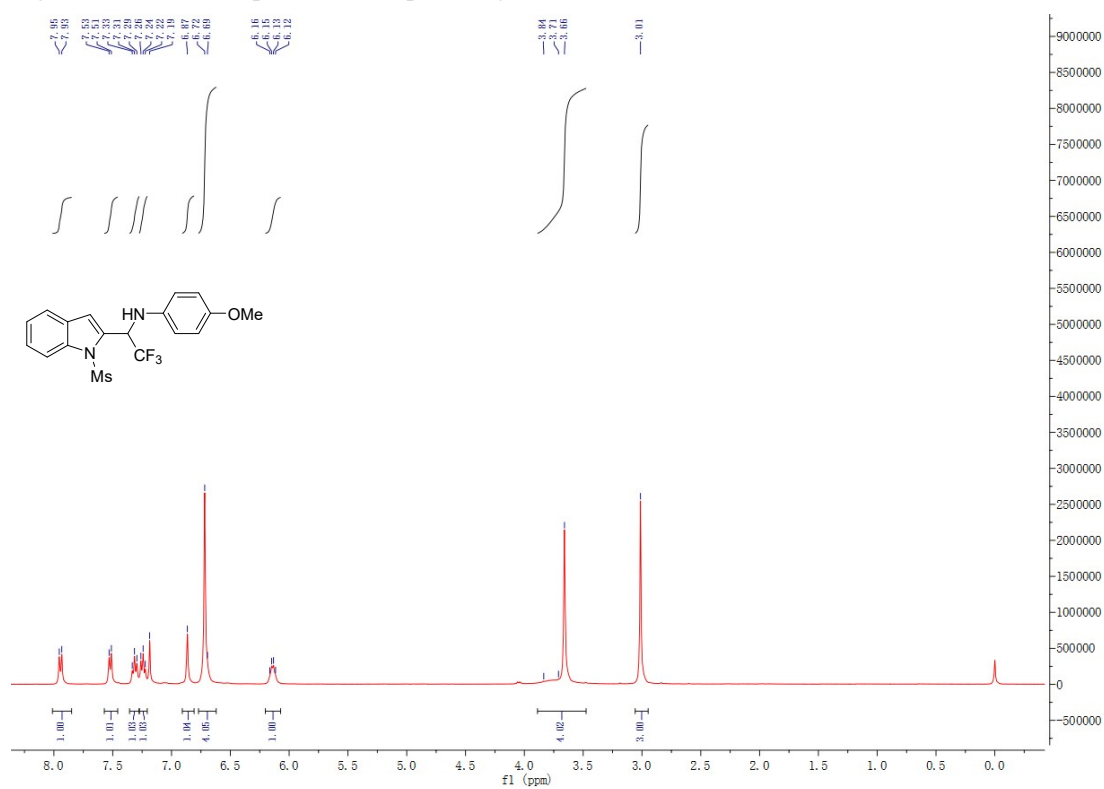

Figure S29  $^{13}\text{C}$ NMR spectra of compound **3j**

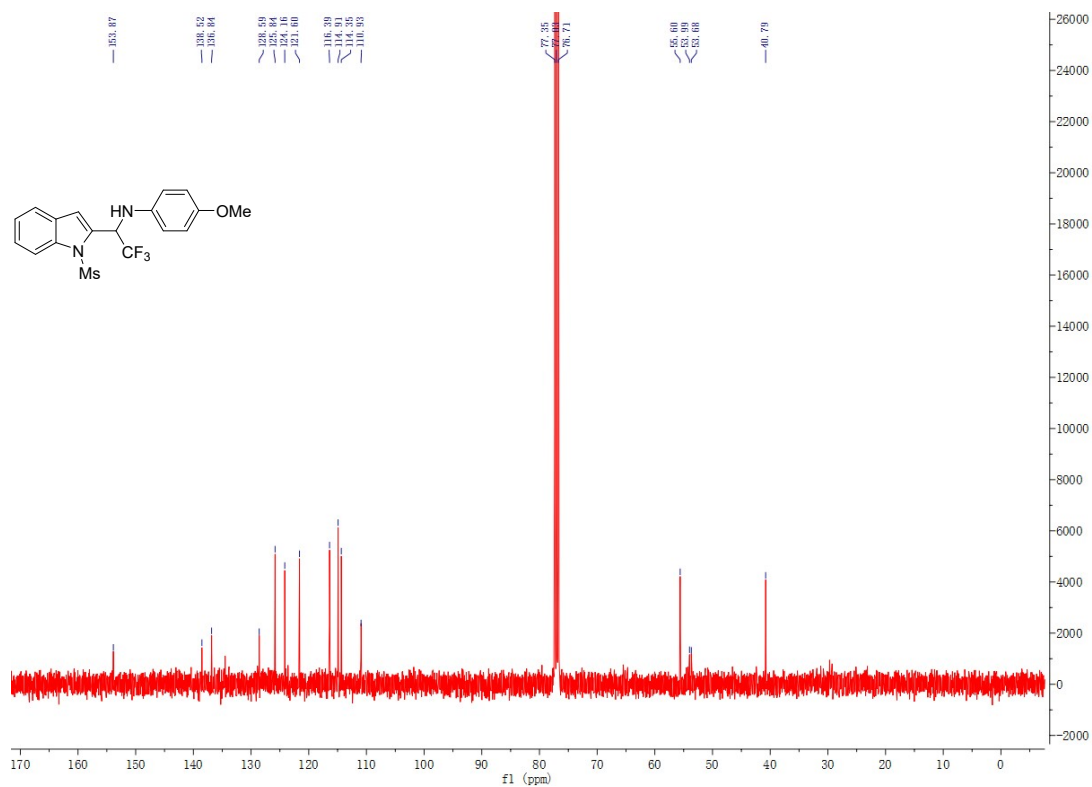

Figure S30  $^{19}\text{F}$ NMR spectra of compound **3j**

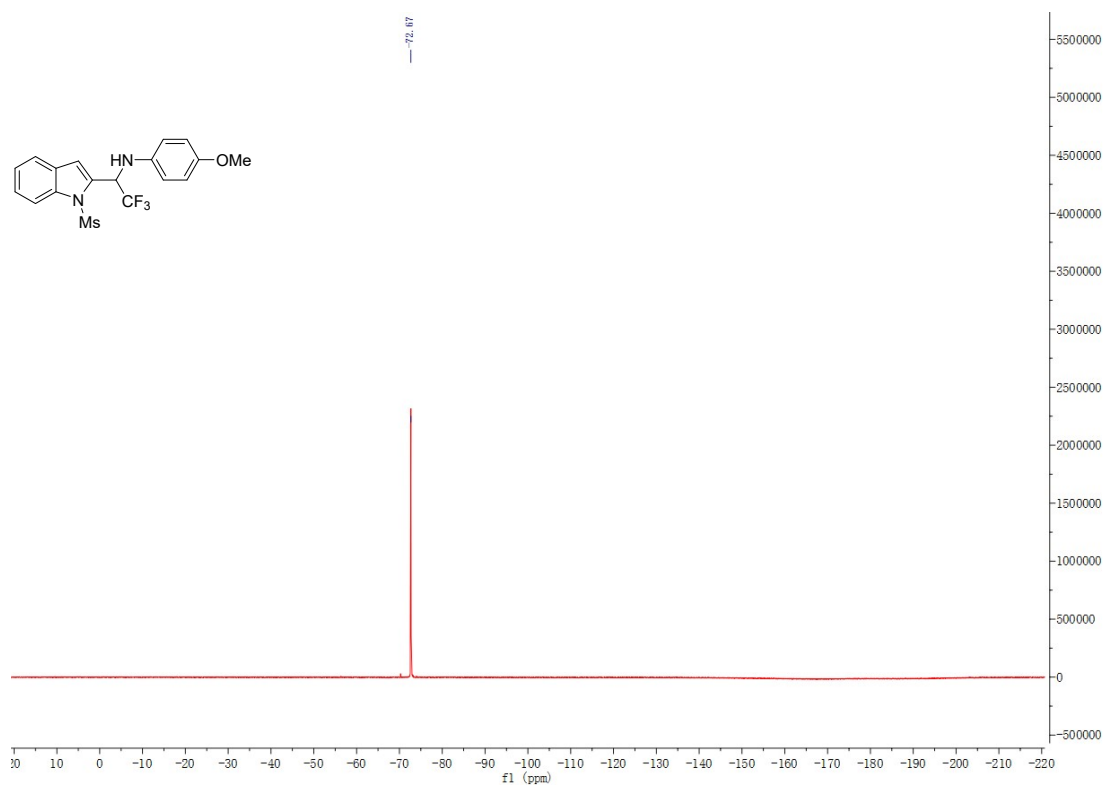

Figure S31 <sup>1</sup>H NMR spectra of compound **3k**

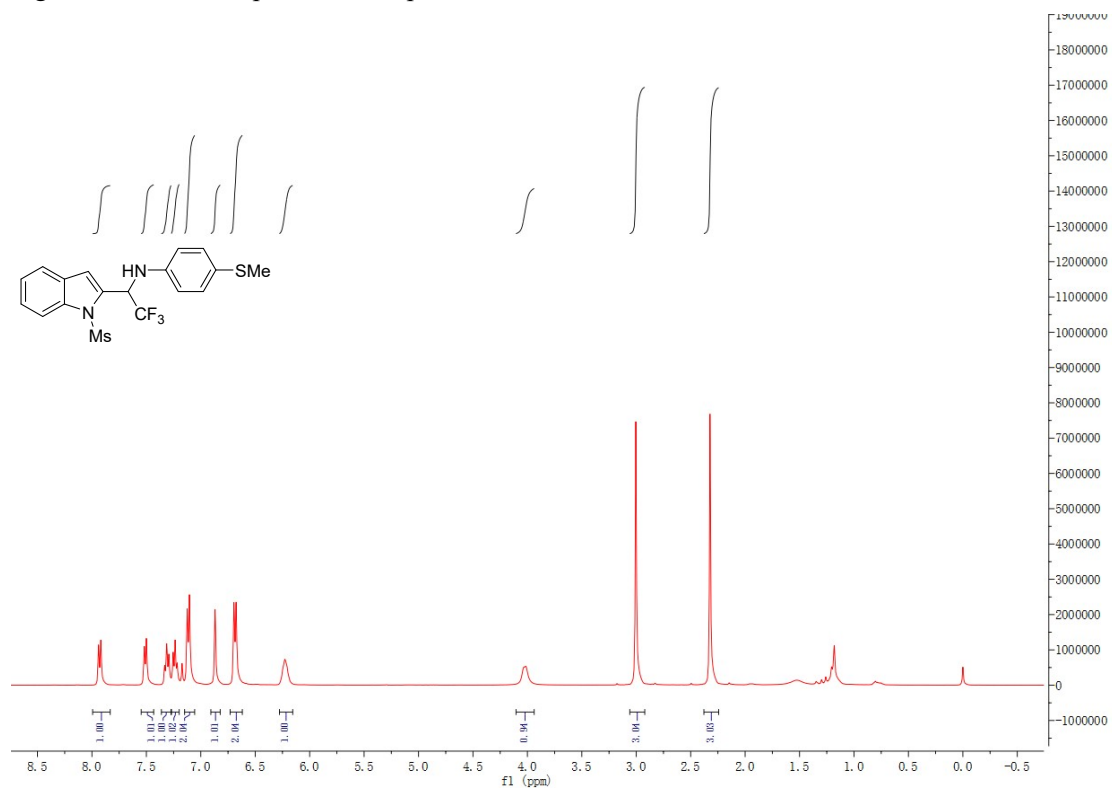

Figure S32 <sup>13</sup>C NMR spectra of compound **3k**

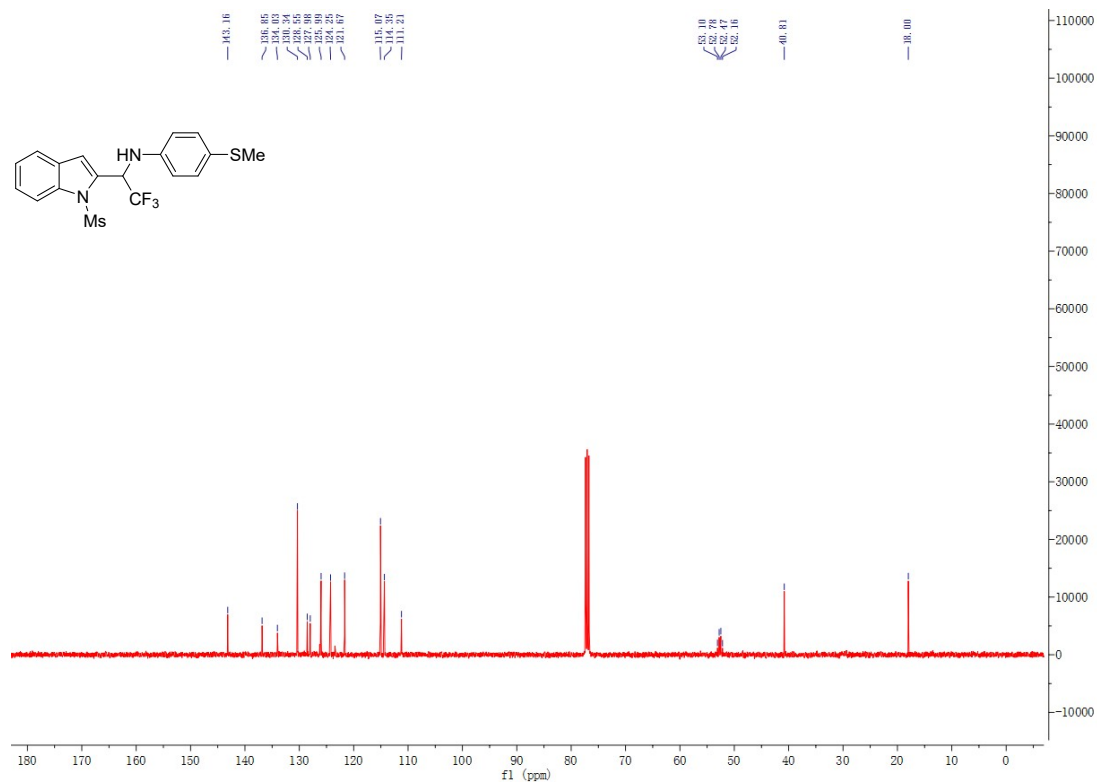

Figure S33  $^{19}\text{F}$ NMR spectra of compound **3k**

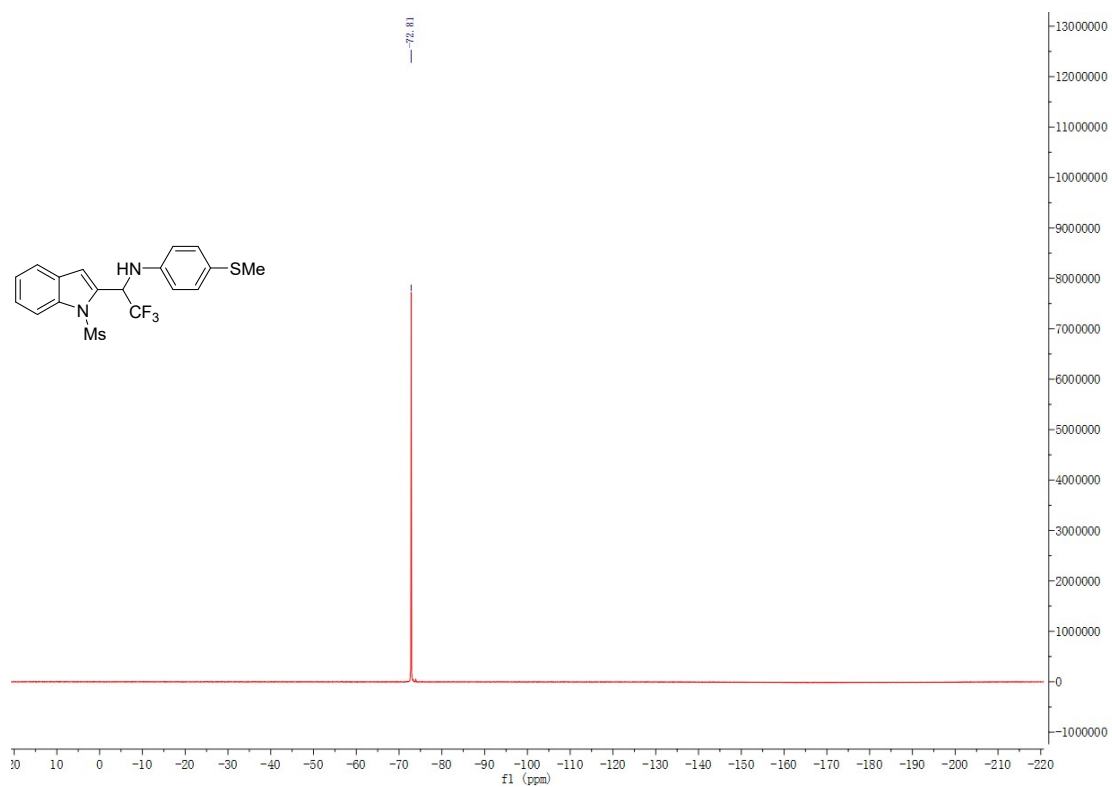

Figure S34  $^1\text{H}$ NMR spectra of compound **3l**

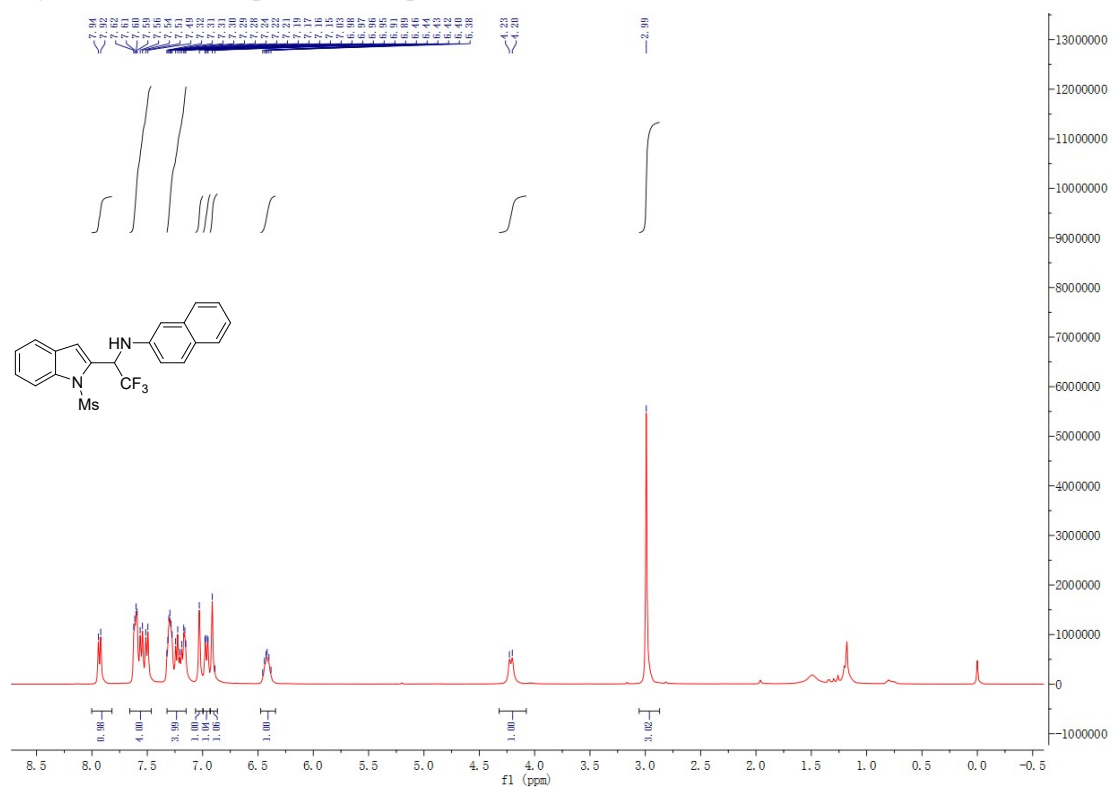

Figure S35  $^{13}\text{C}$ NMR spectra of compound **31**

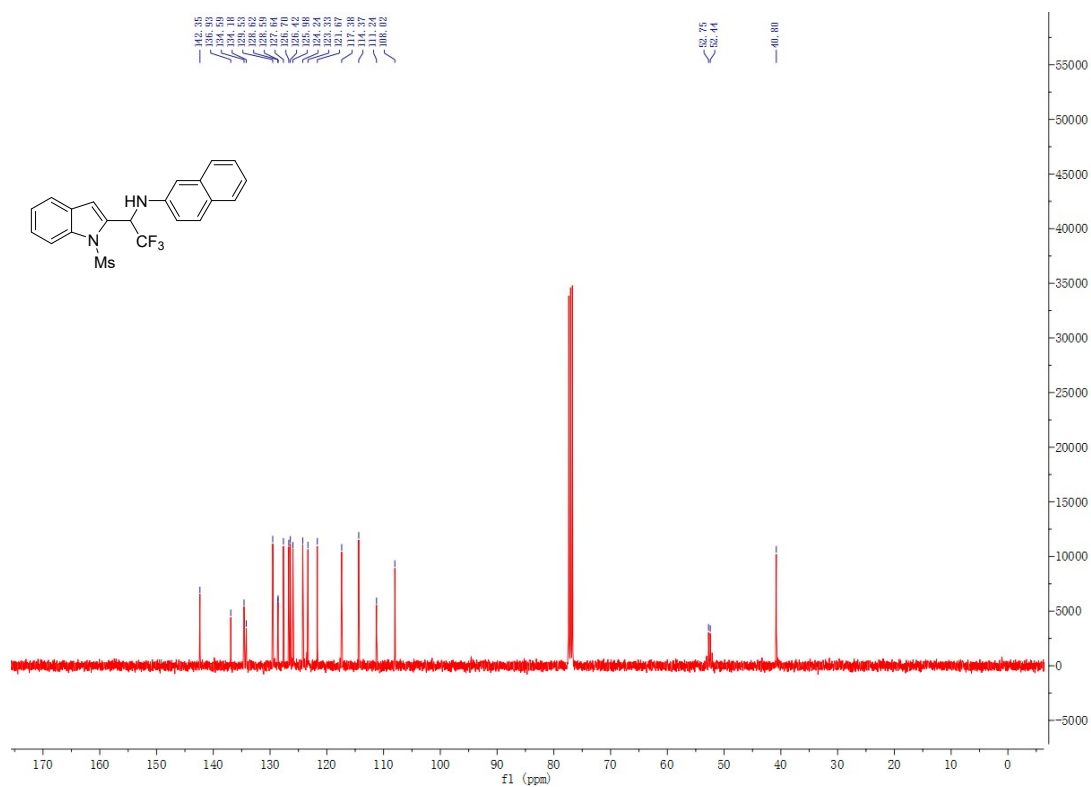

Figure S36  $^{19}\text{F}$ NMR spectra of compound **31**

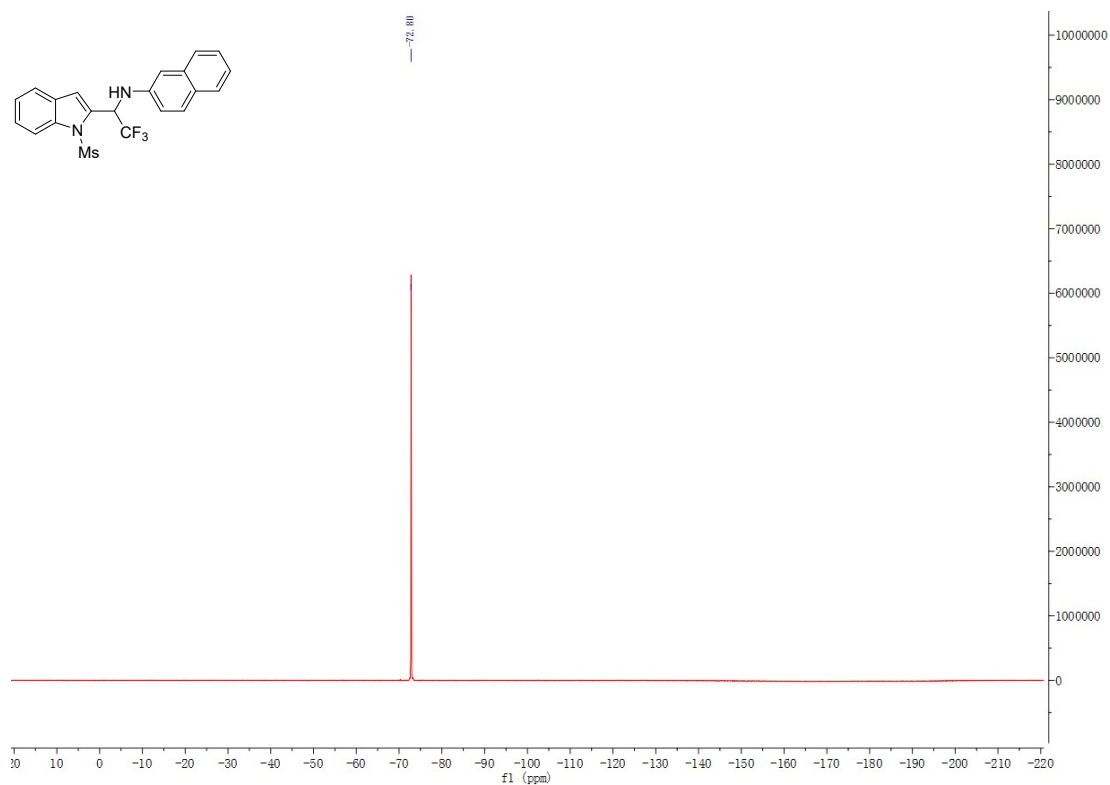

Figure S37 <sup>1</sup>HNMR spectra of compound **3m**

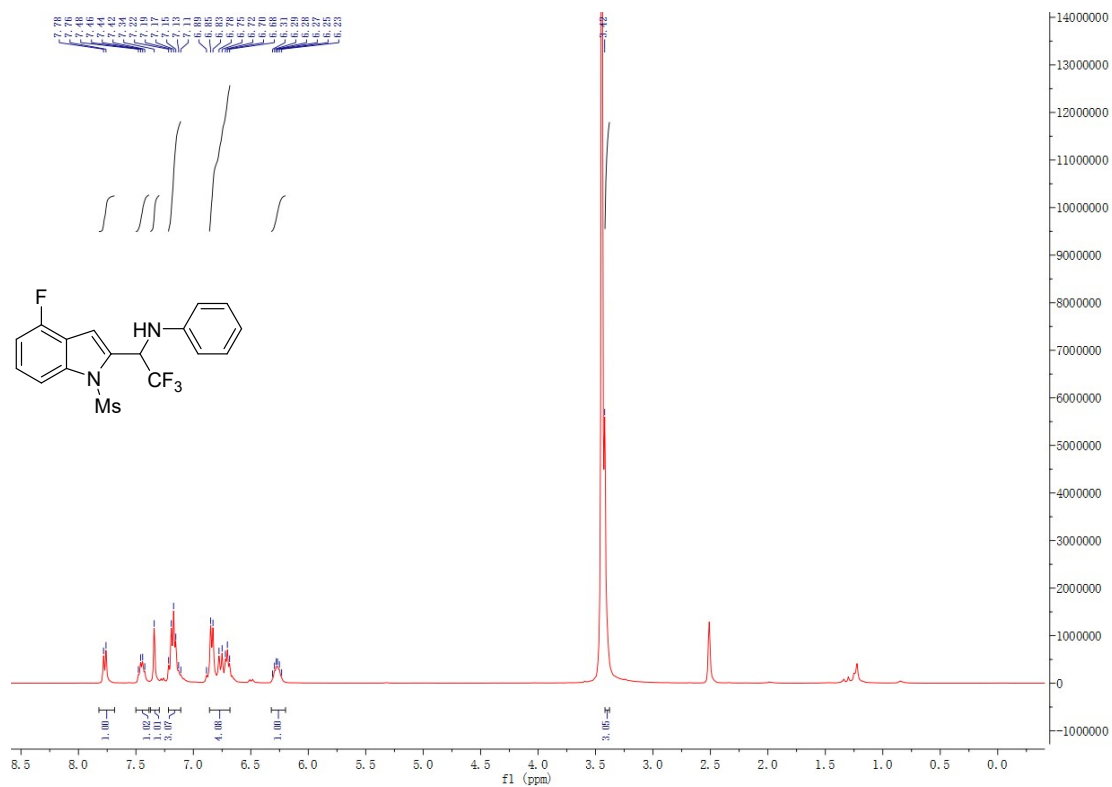

Figure S38 <sup>13</sup>CNMR spectra of compound **3m**

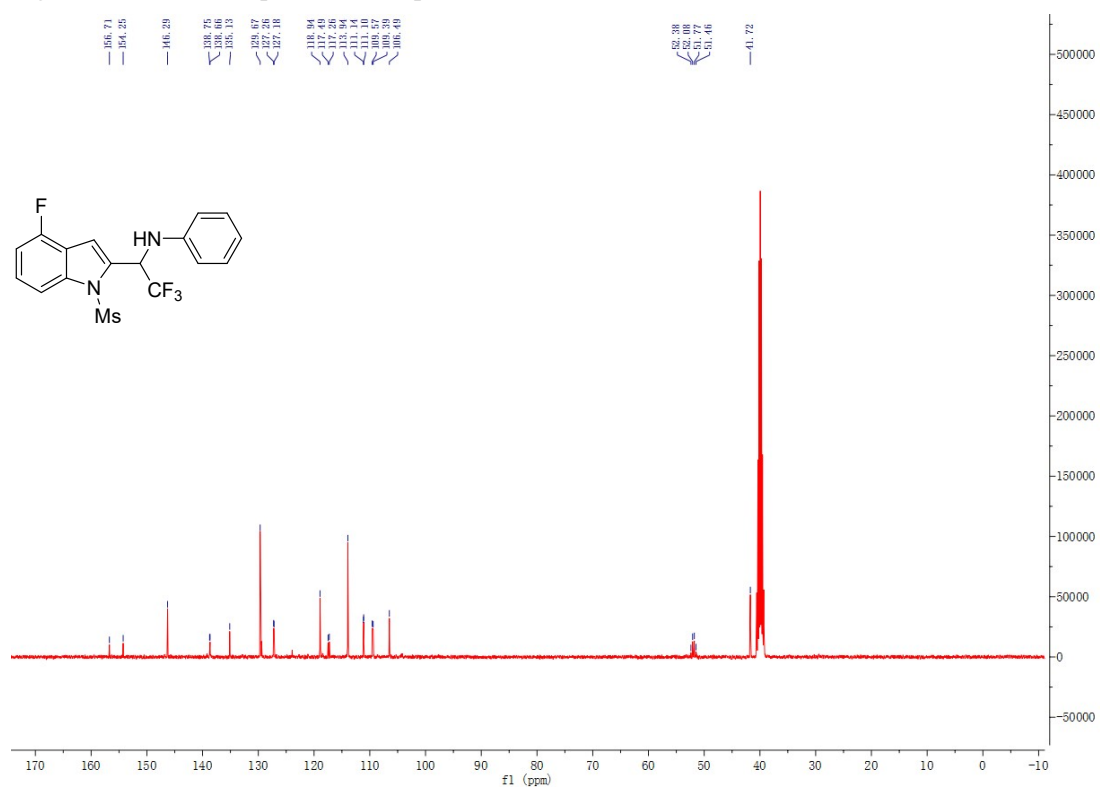

Figure S39  $^{19}\text{F}$ NMR spectra of compound **3m**

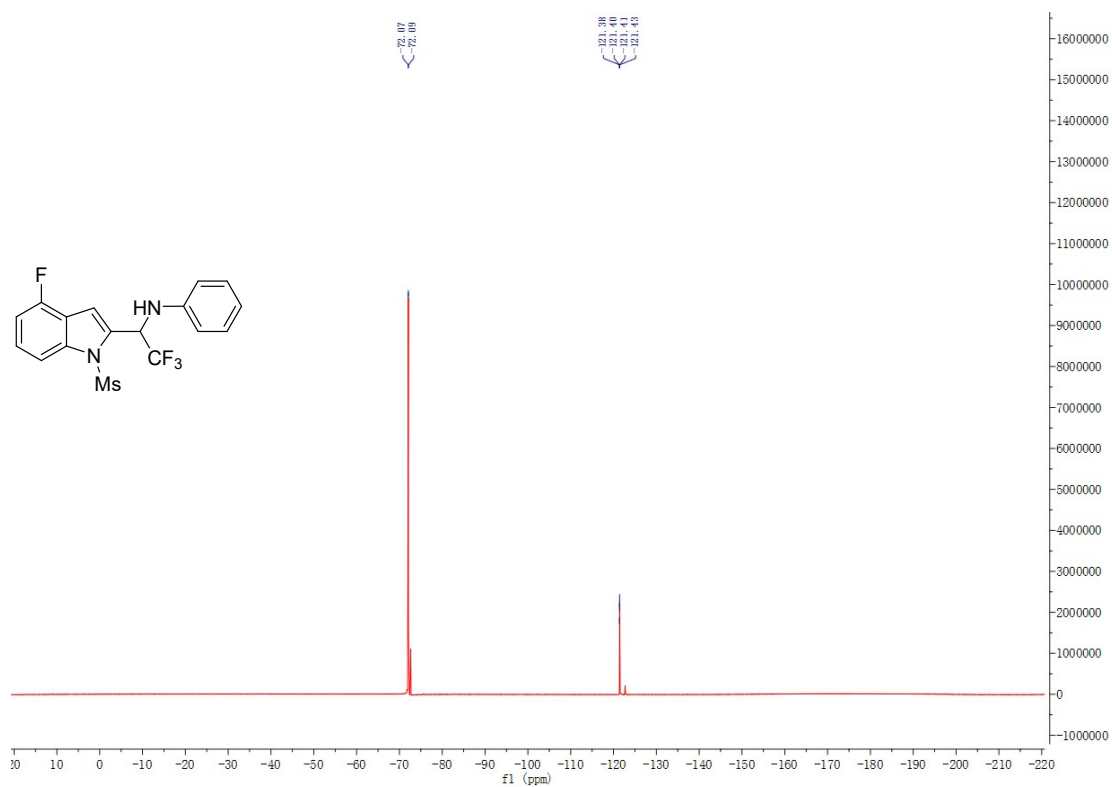

Figure S40  $^1\text{H}$ NMR spectra of compound **3n**

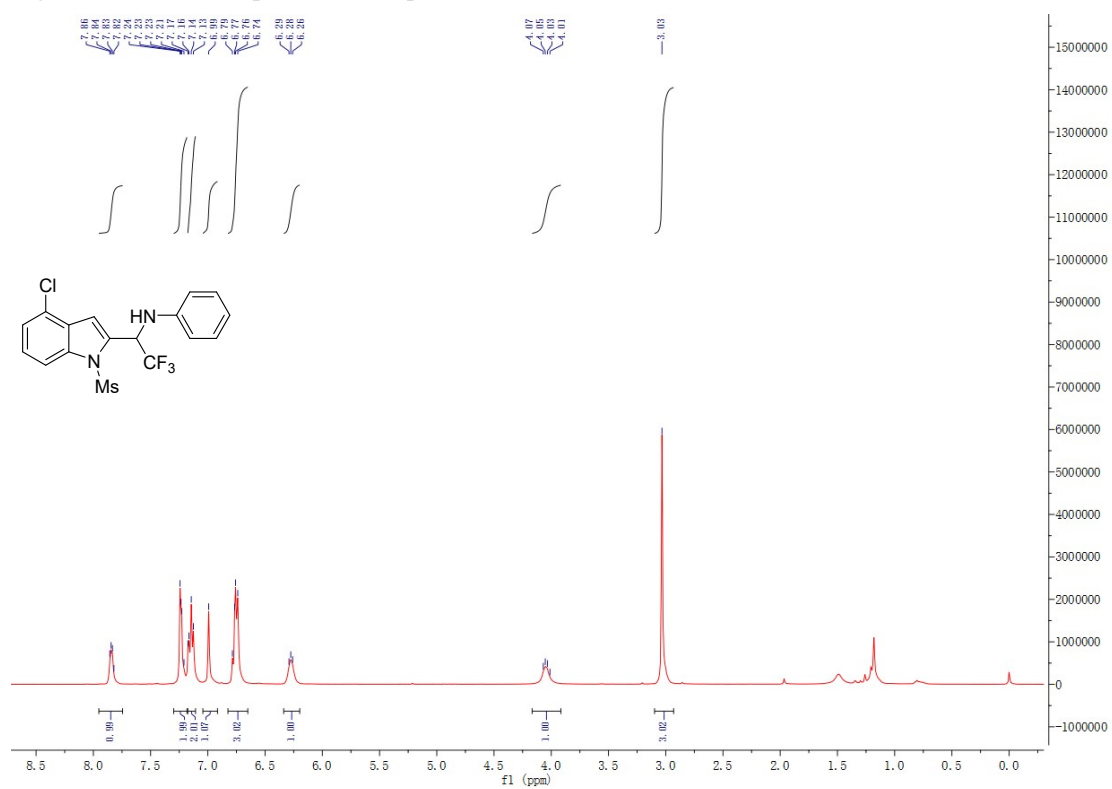

Figure S41  $^{13}\text{C}$ NMR spectra of compound **3n**

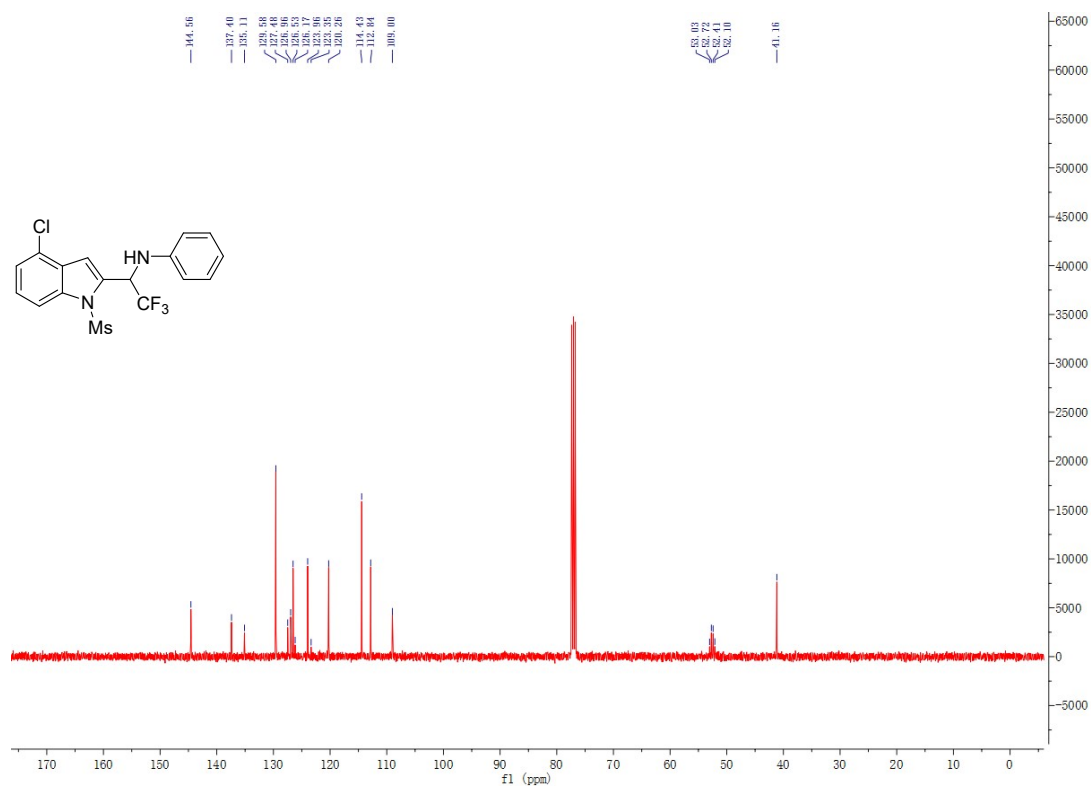

Figure S42  $^{19}\text{F}$ NMR spectra of compound **3n**

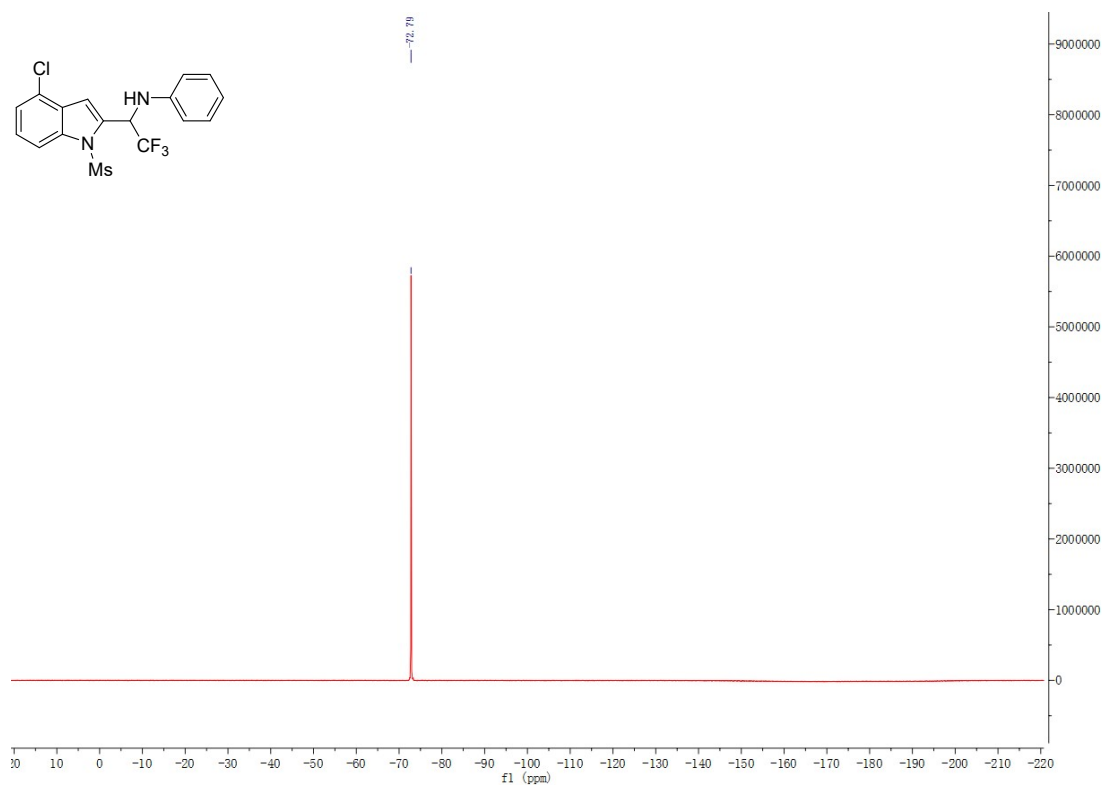

Figure S43 <sup>1</sup>HNMR spectra of compound **3o**

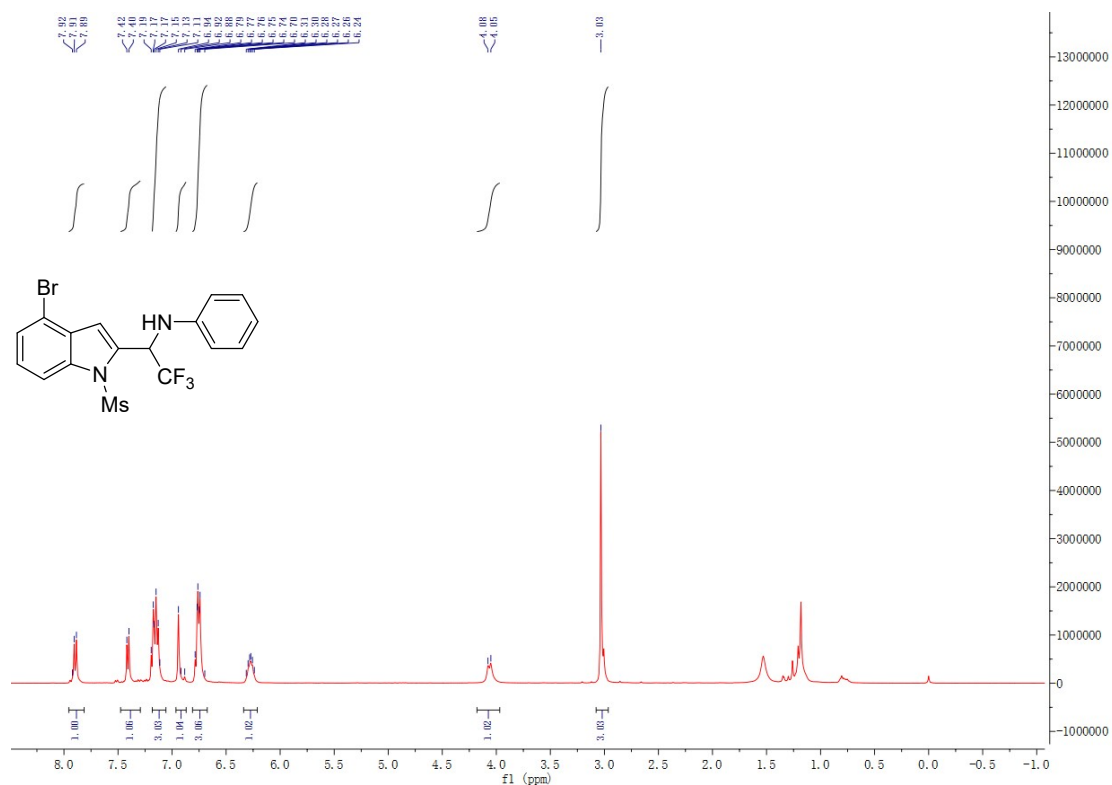

Figure S44 <sup>13</sup>CNMR spectra of compound **3o**

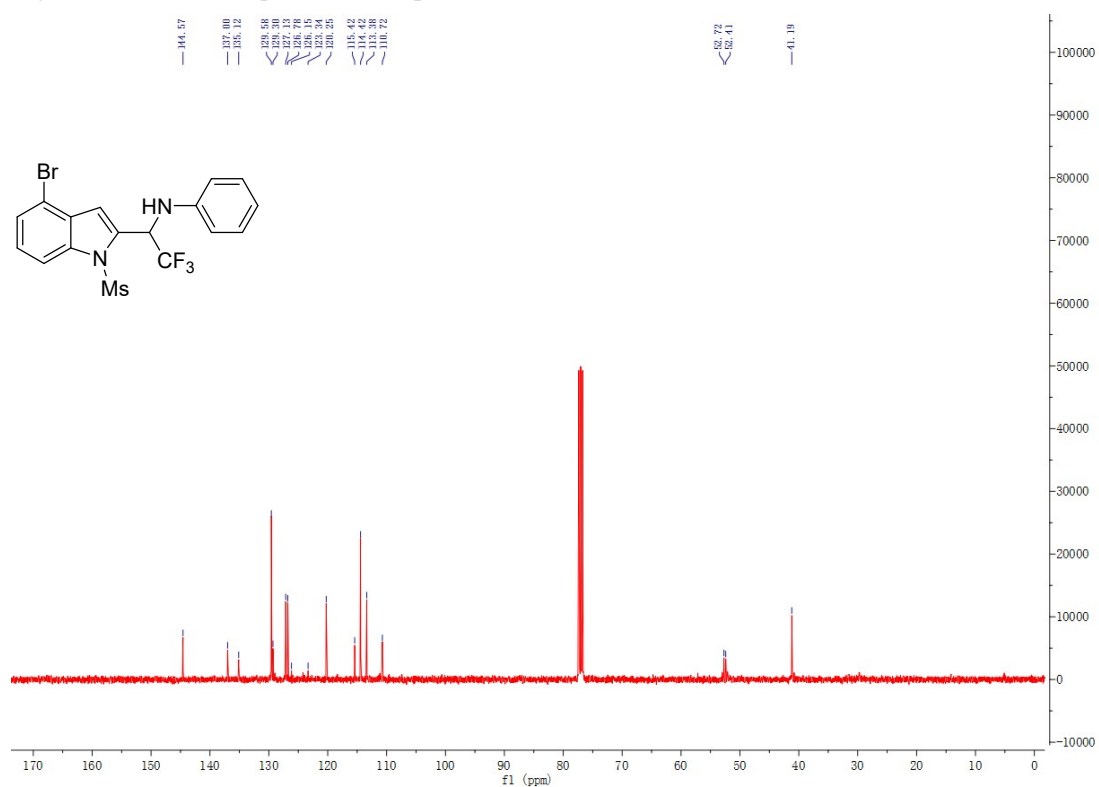



Figure S47 <sup>13</sup>CNMR spectra of compound **3p**

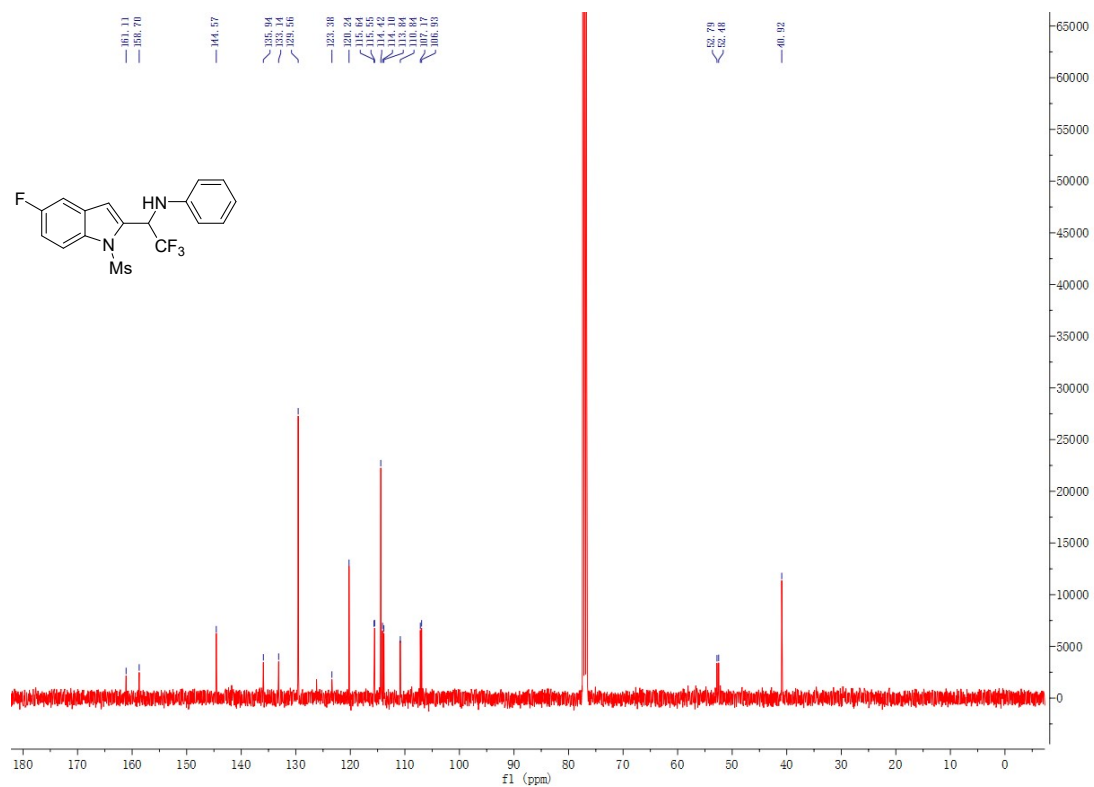

Figure S48 <sup>19</sup>F NMR spectra of compound **3p**

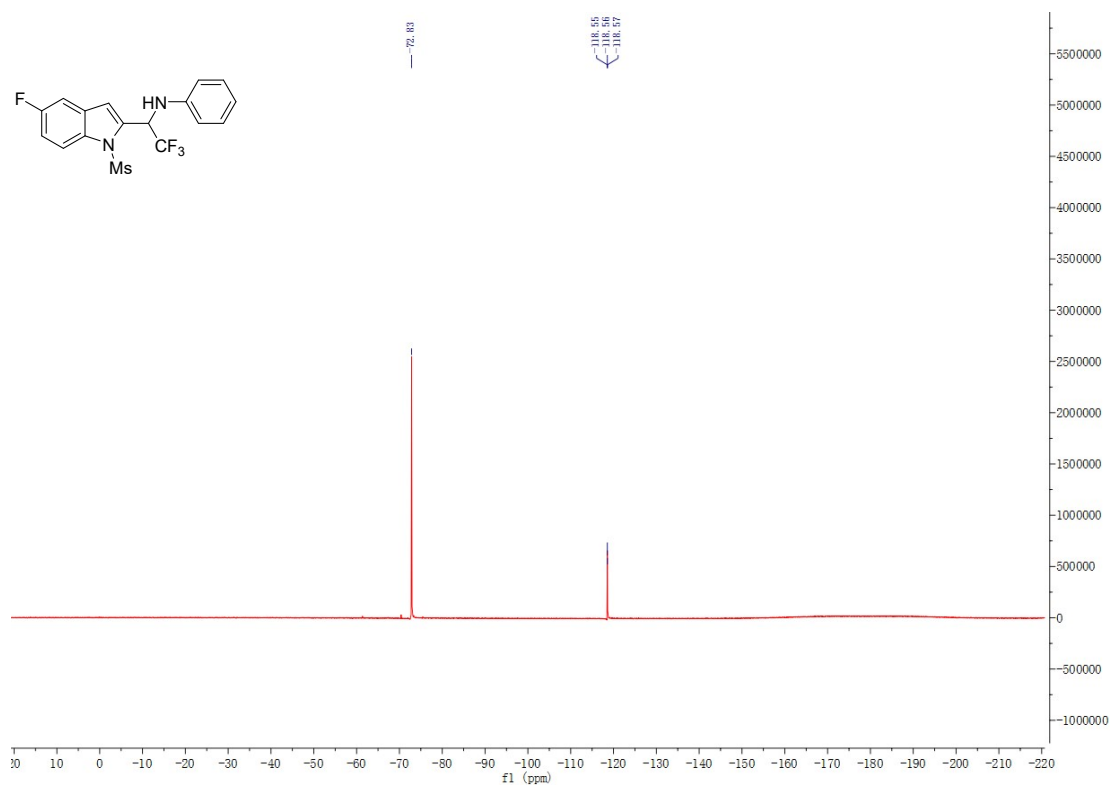

Figure S49 <sup>1</sup>HNMR spectra of compound **3q**

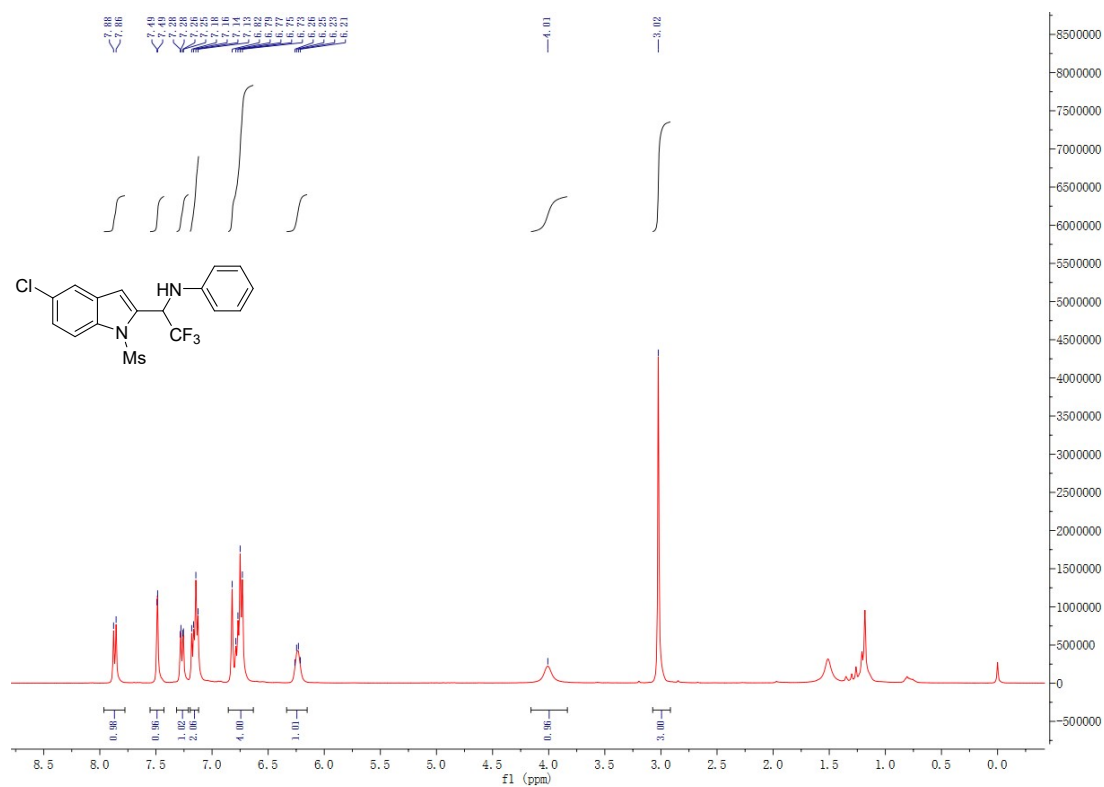

Figure S50 <sup>13</sup>CNMR spectra of compound **3q**

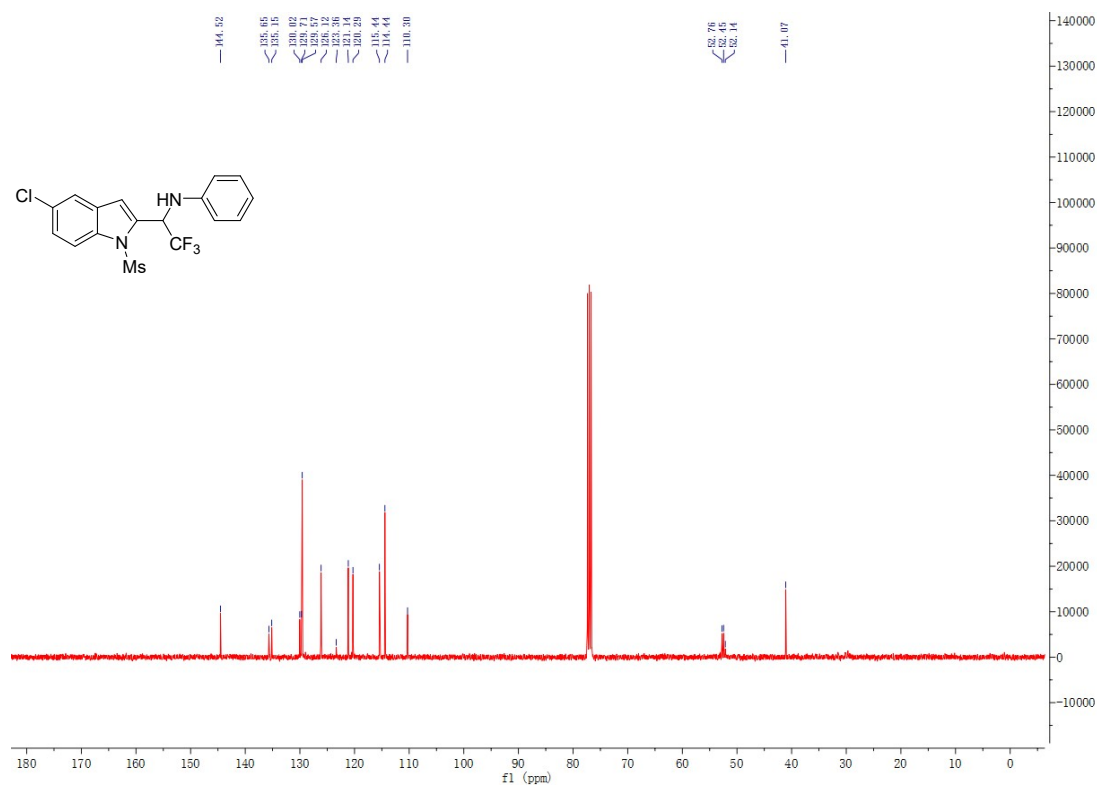

Figure S51  $^{19}\text{F}$ NMR spectra of compound **3q**

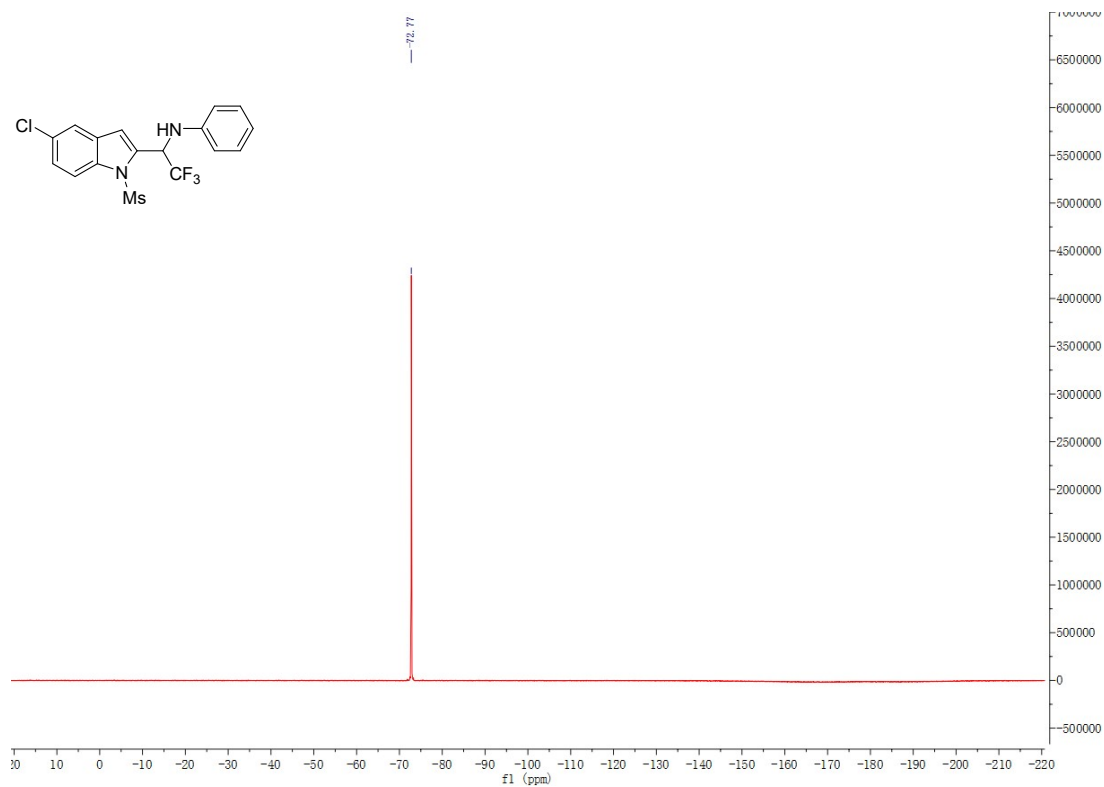

Figure S52  $^1\text{H}$ NMR spectra of compound **3r**

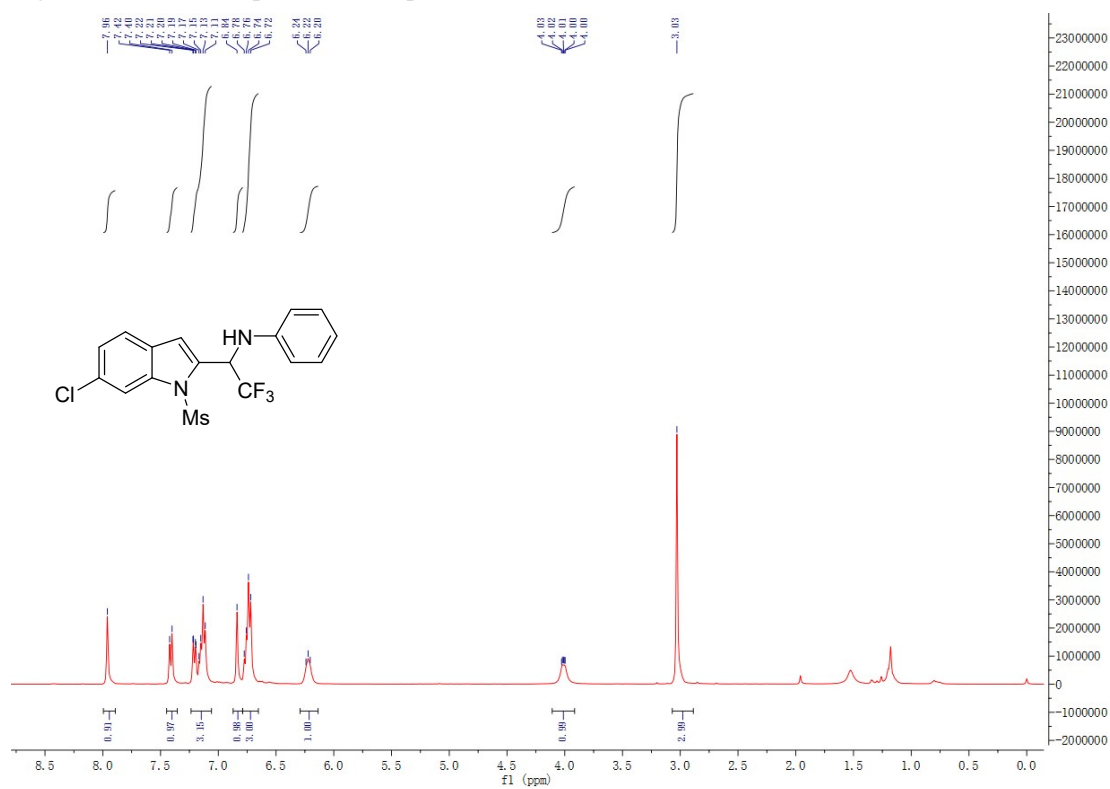

Figure S53  $^{13}\text{C}$ NMR spectra of compound **3r**

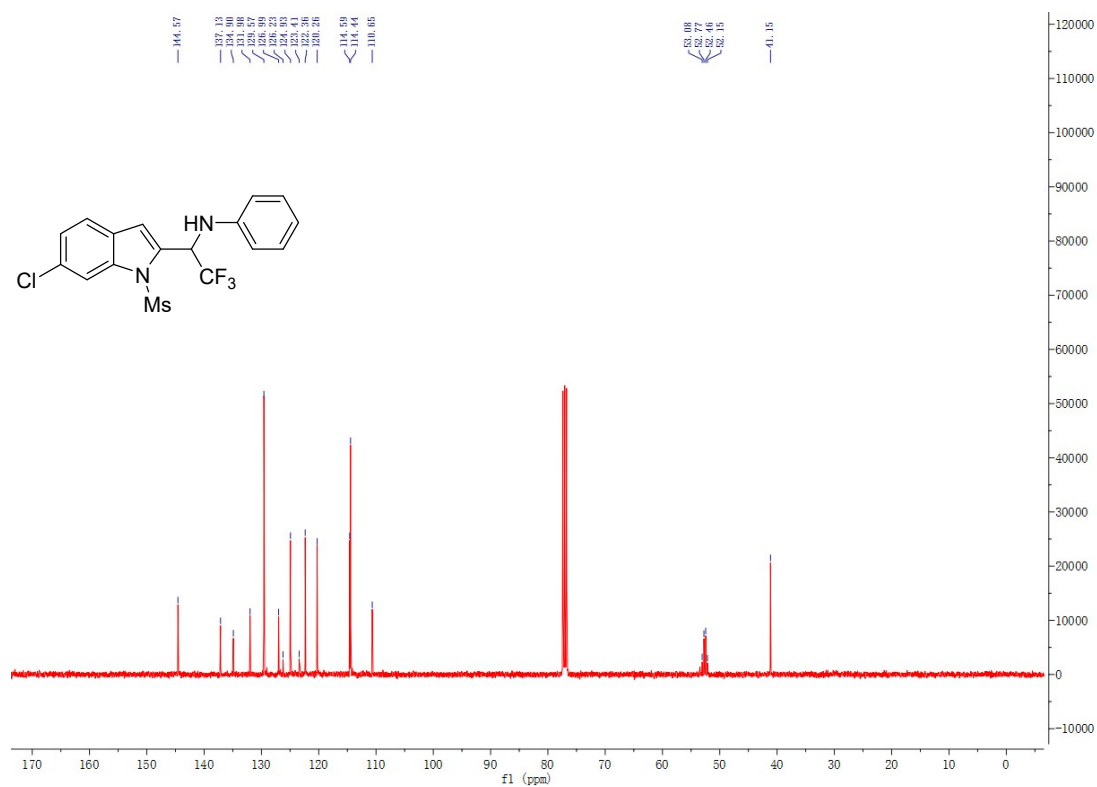

Figure S54  $^{19}\text{F}$ NMR spectra of compound **3r**

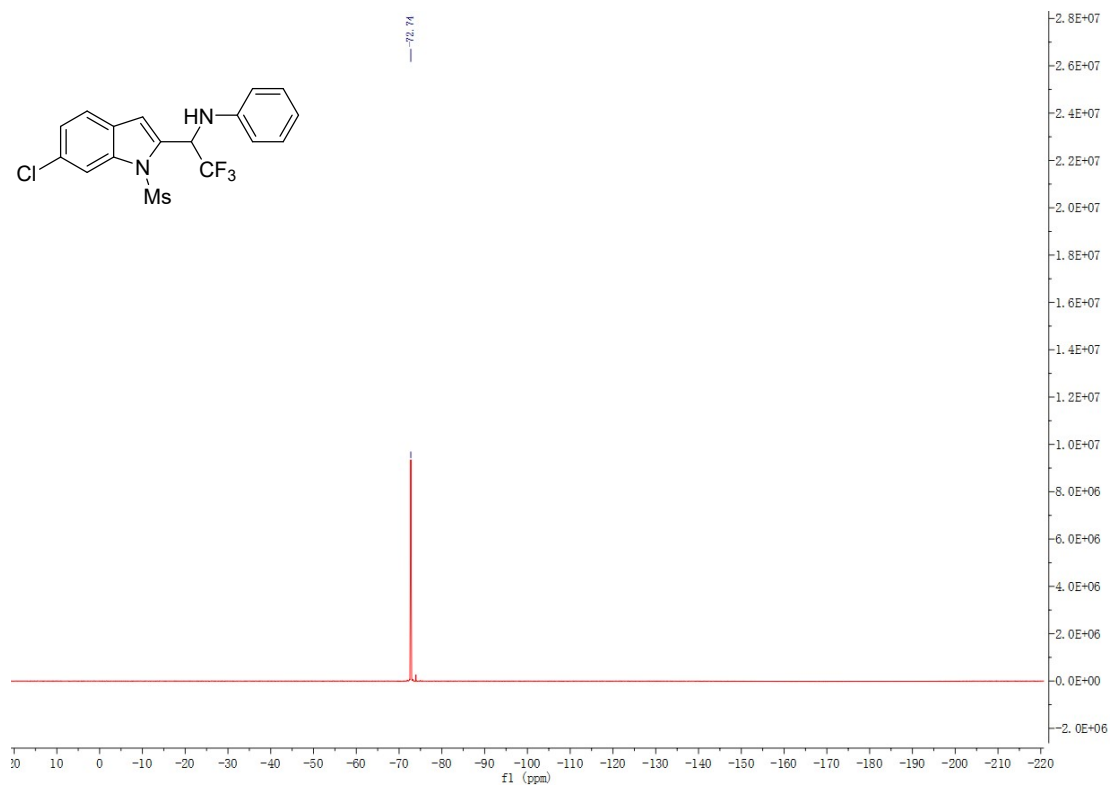

Figure S55 <sup>1</sup>HNMR spectra of compound **3s**

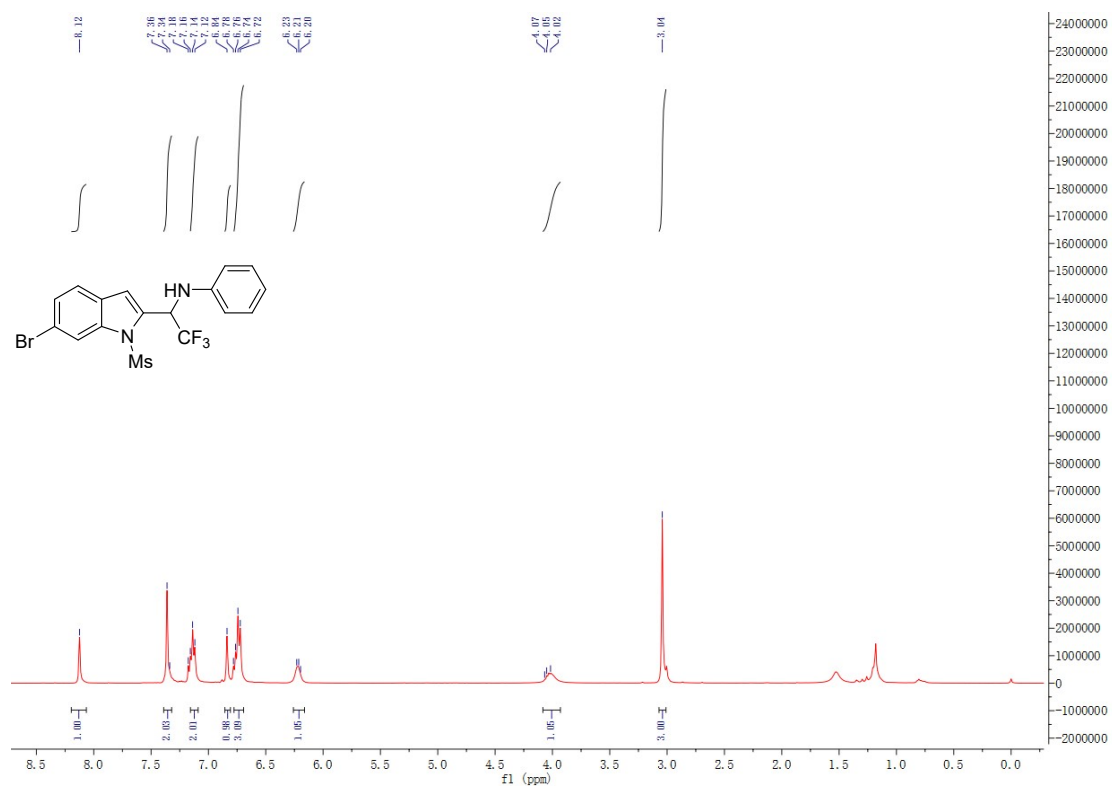

Figure S56 <sup>13</sup>CNMR spectra of compound **3s**

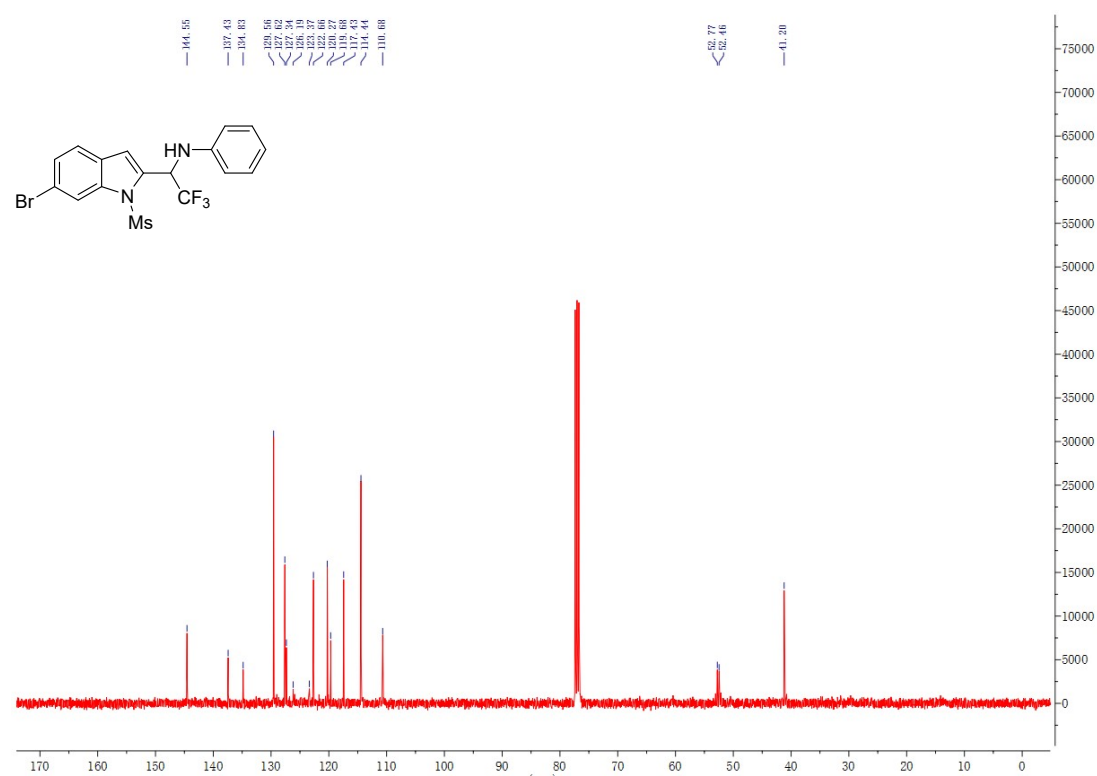

Figure S57  $^{19}\text{F}$ NMR spectra of compound **3s**

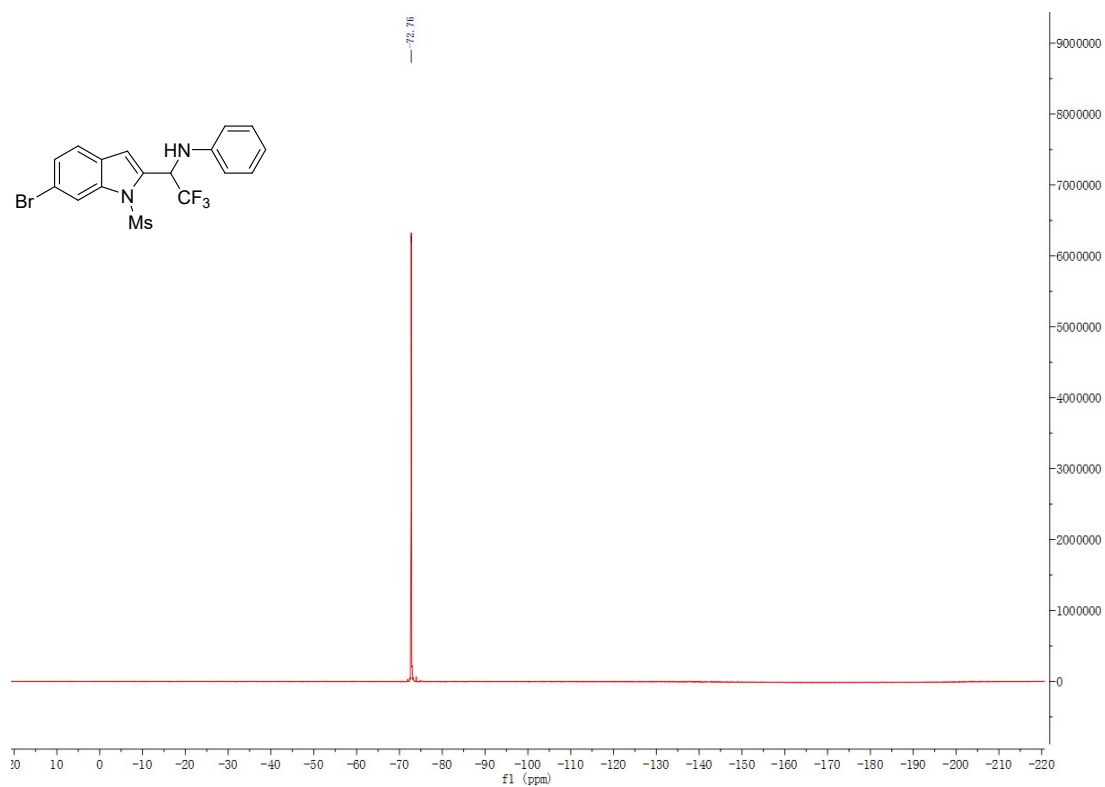

Figure S58  $^1\text{H}$ NMR spectra of compound **3t**

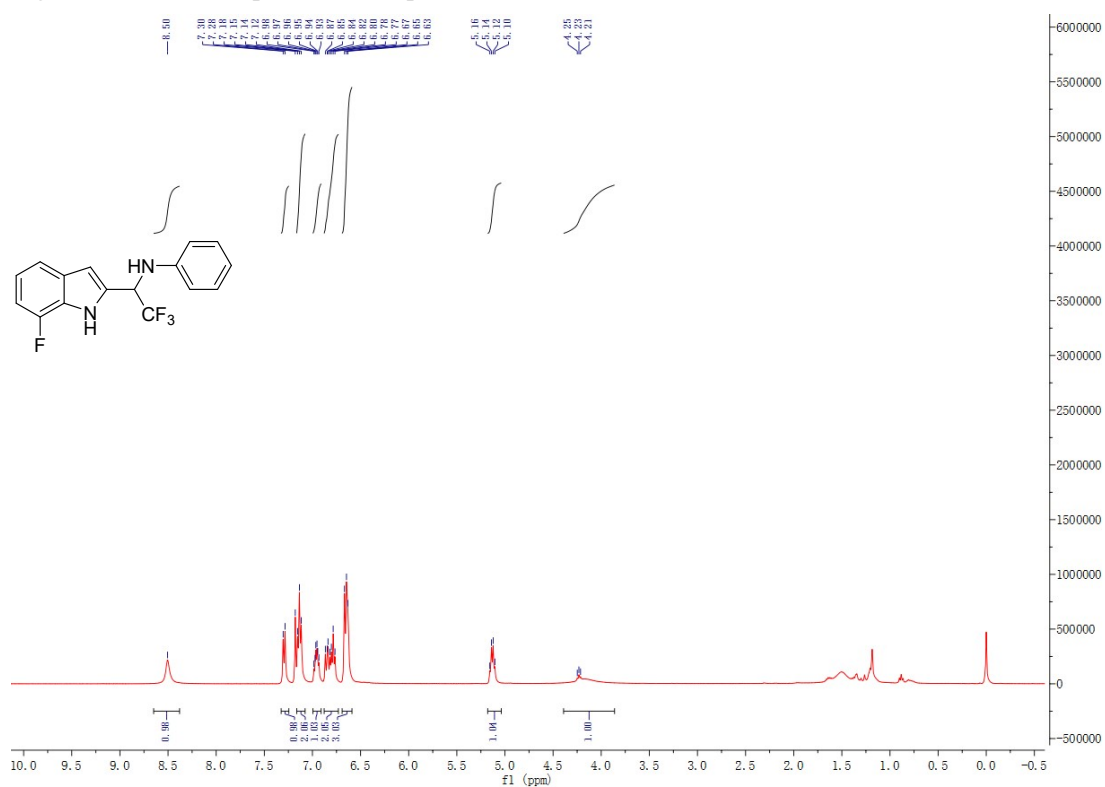

Figure S59 <sup>13</sup>CNMR spectra of compound **3t**

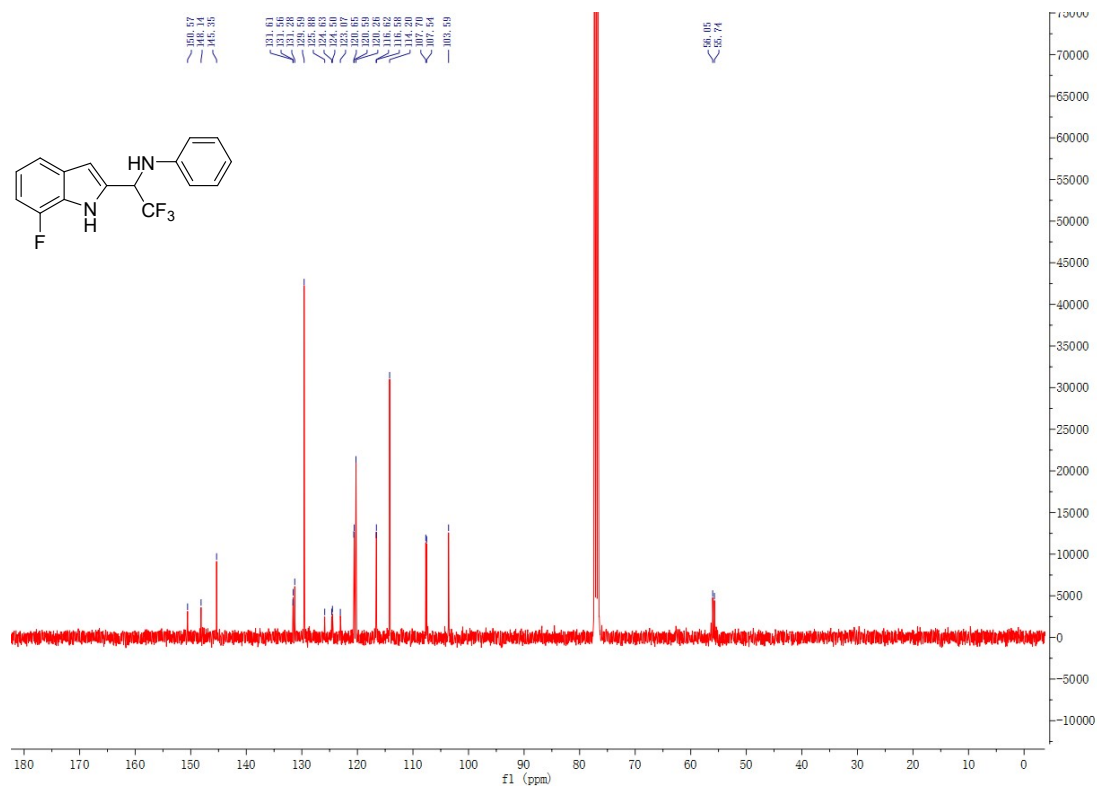

Figure S60 <sup>19</sup>FNMR spectra of compound **3t**

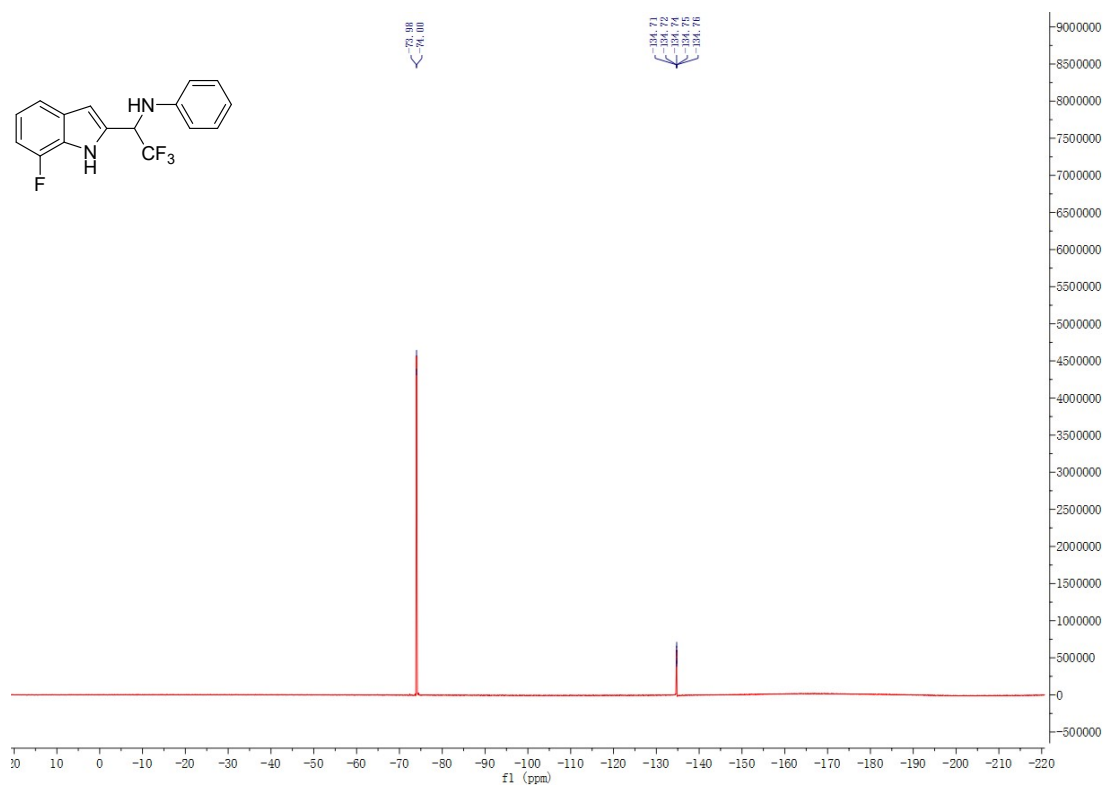

Figure S61 <sup>1</sup>HNMR spectra of compound **3u**

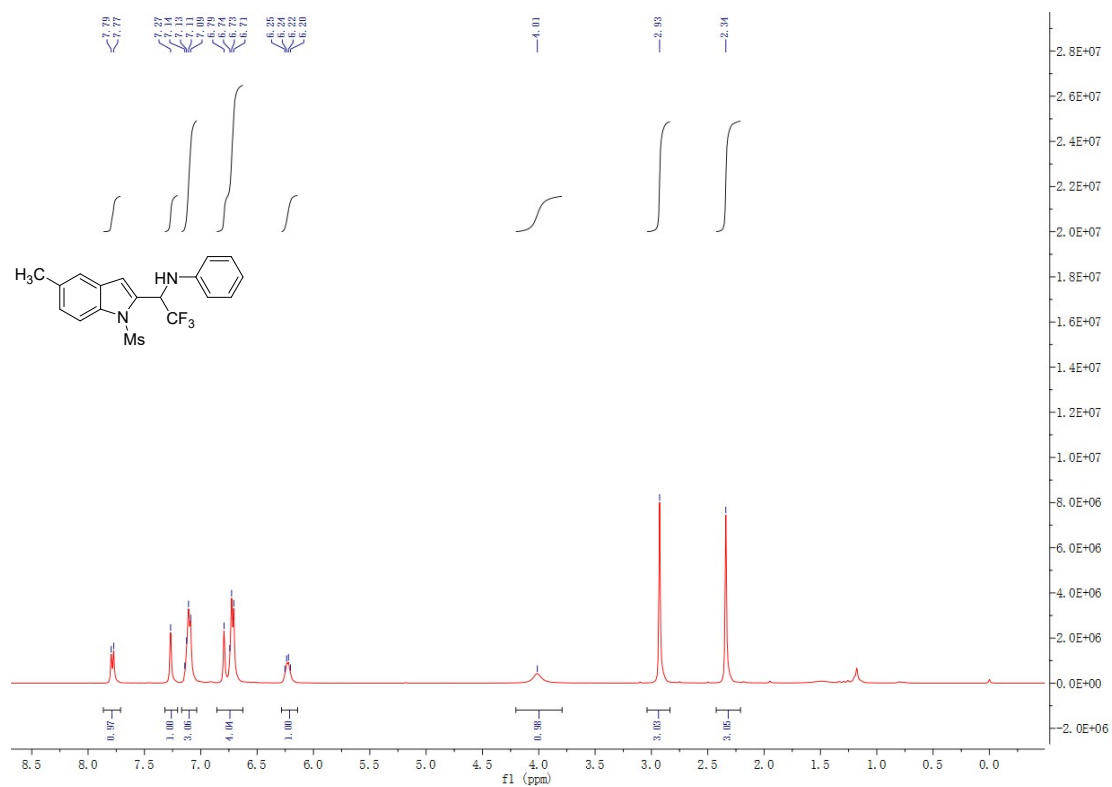

Figure S62 <sup>13</sup>CNMR spectra of compound **3u**

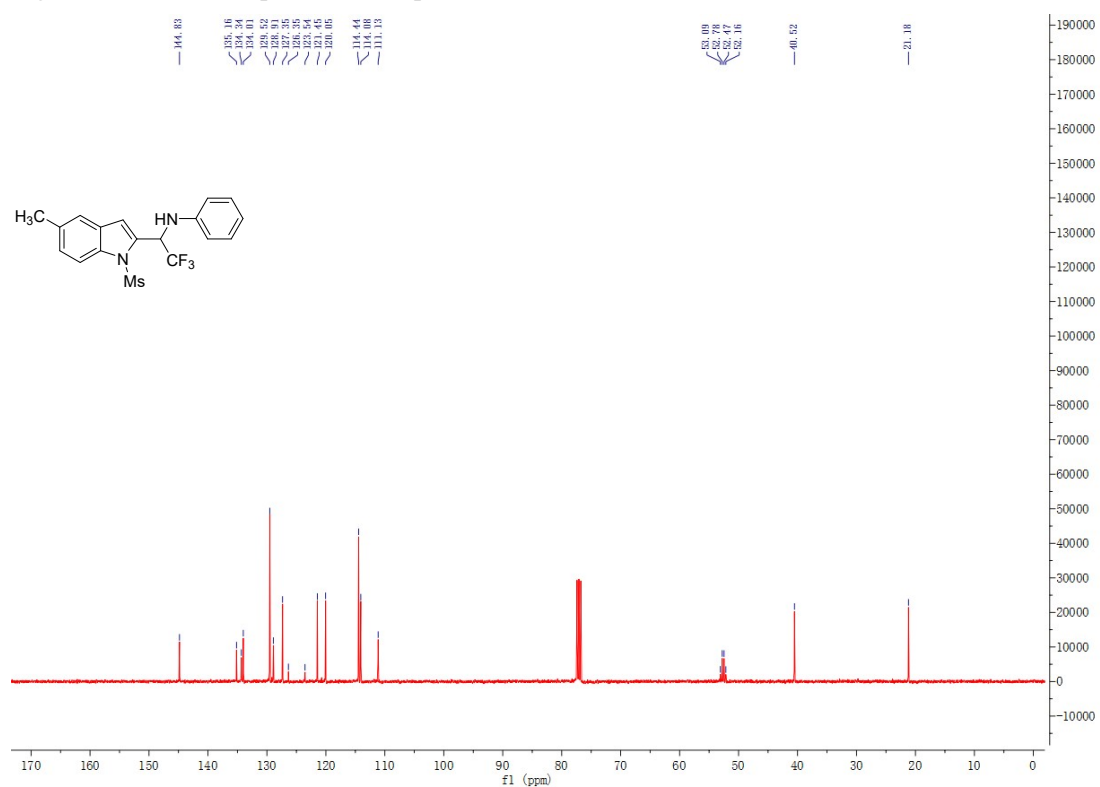

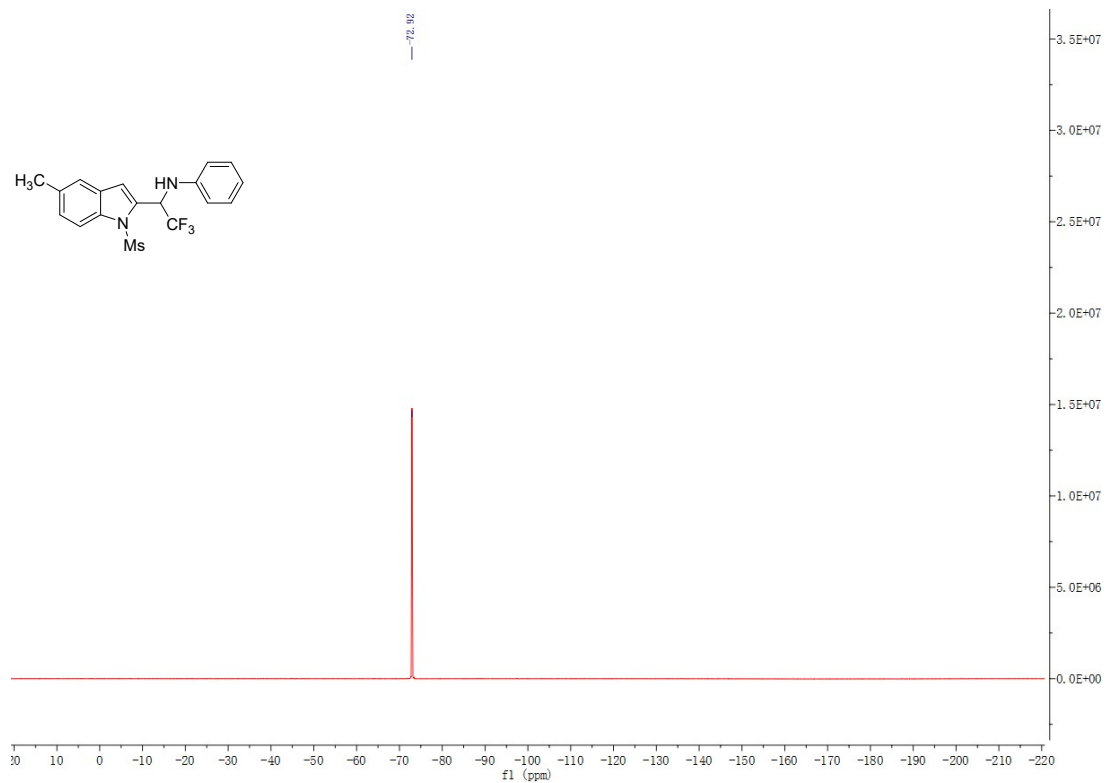

Figure S64 <sup>1</sup>H NMR spectra of compound **3v**

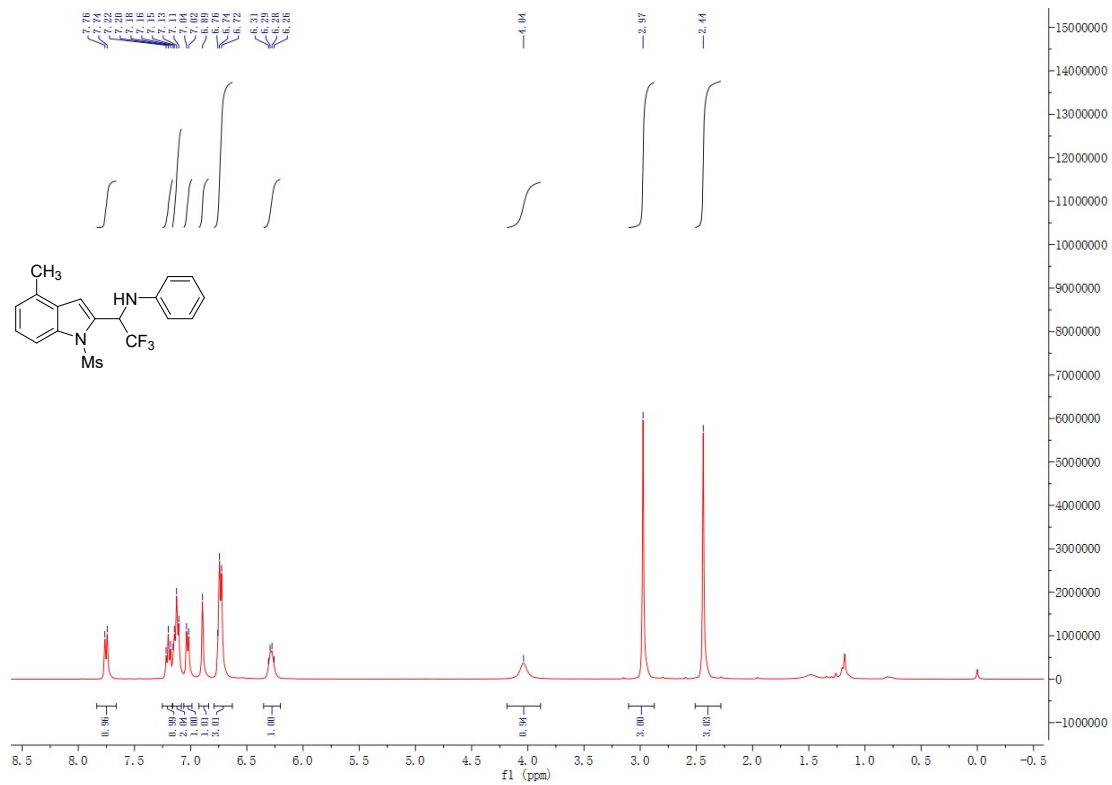

Figure S65  $^{13}\text{C}$ NMR spectra of compound **3v**

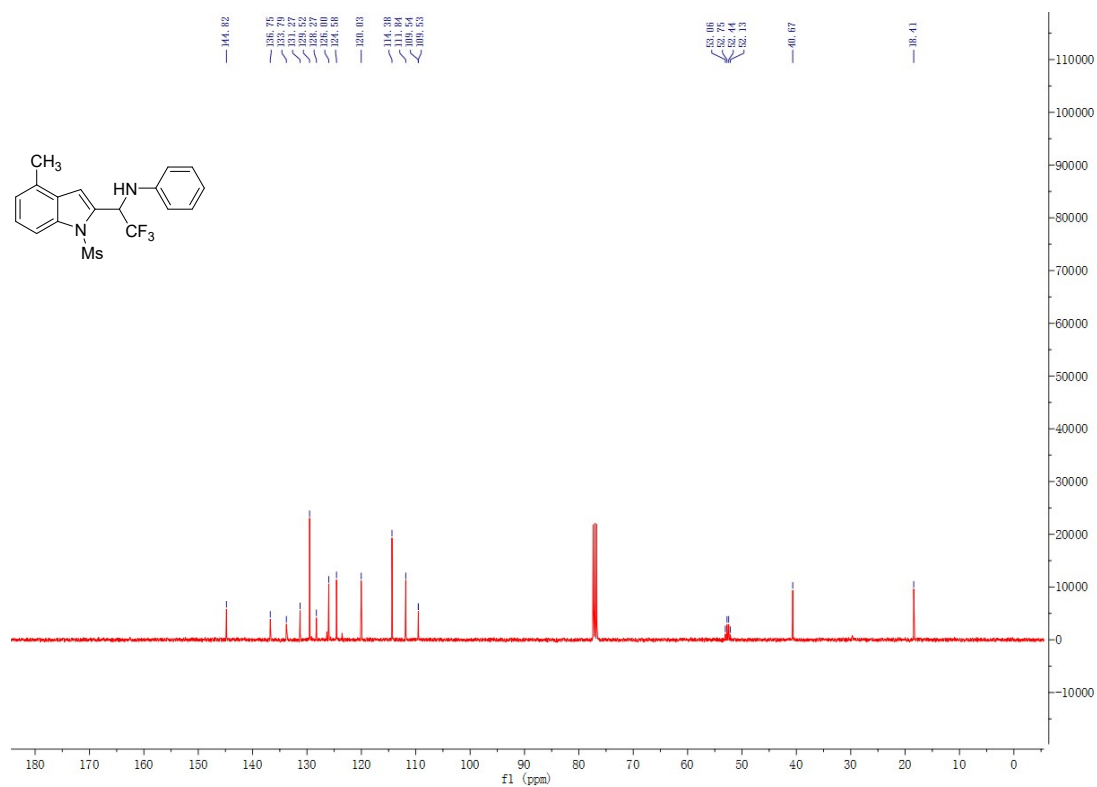

Figure S66  $^{19}\text{F}$ NMR spectra of compound **3v**

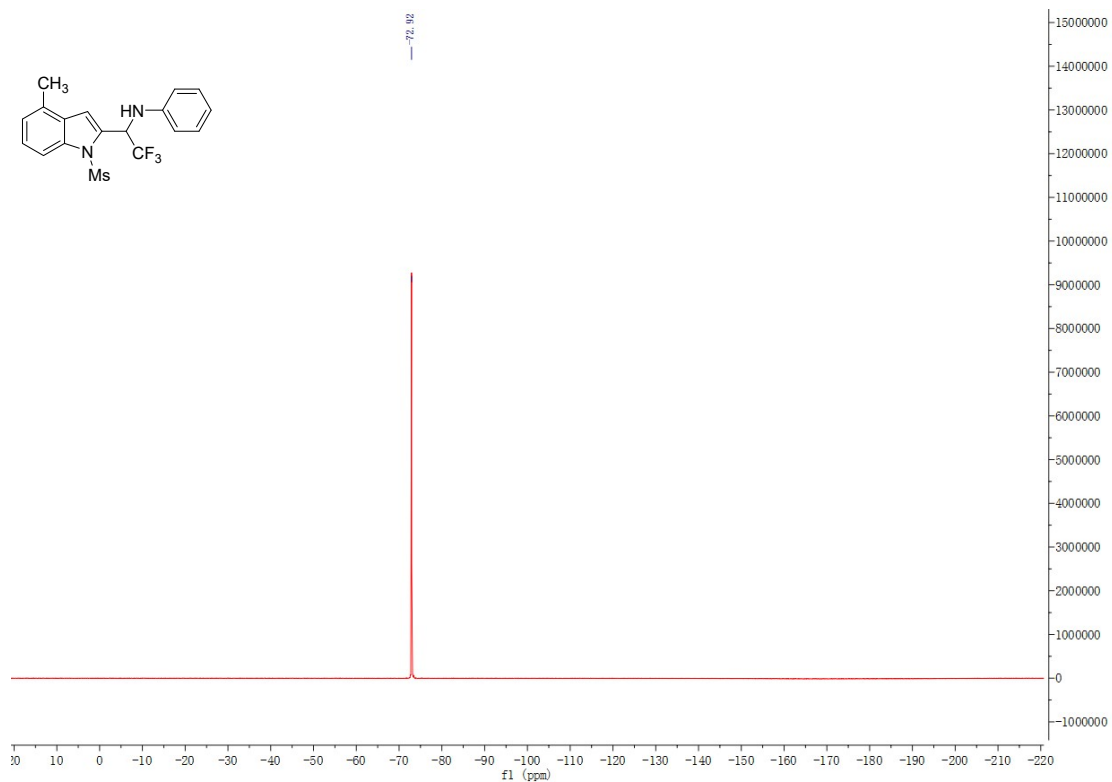

Figure S67 <sup>1</sup>HNMR spectra of compound **3x**

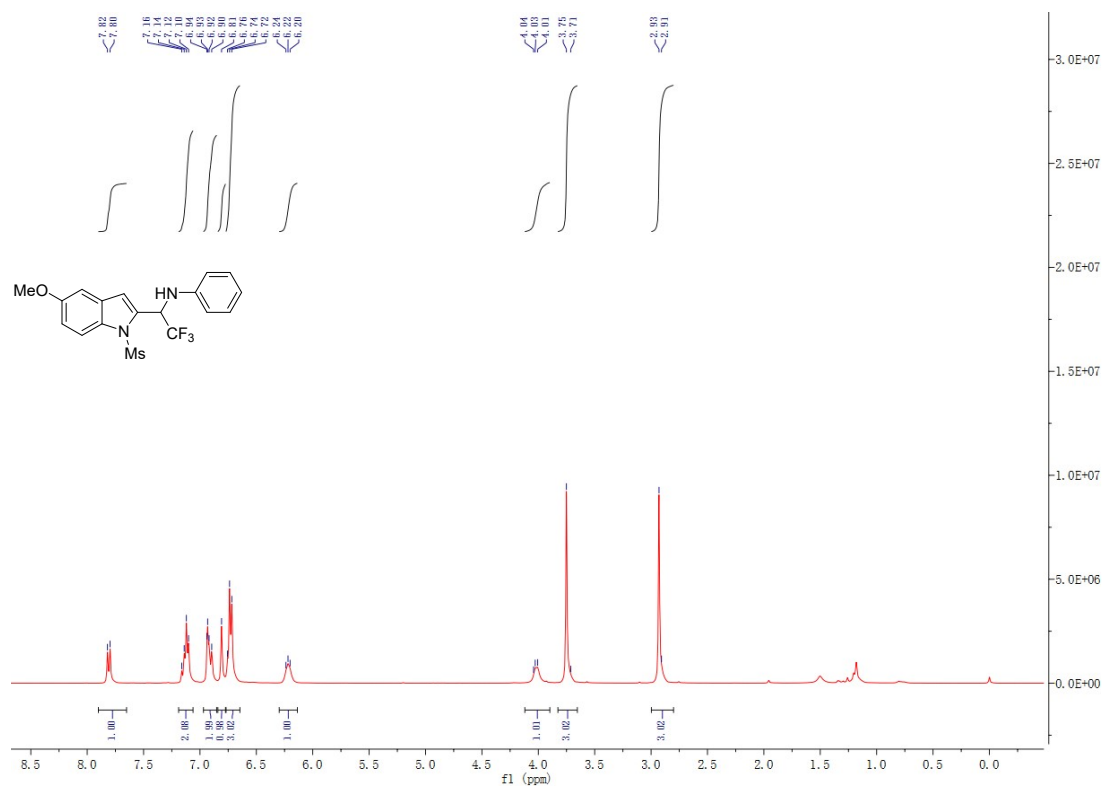

Figure S68 <sup>13</sup>CNMR spectra of compound **3x**

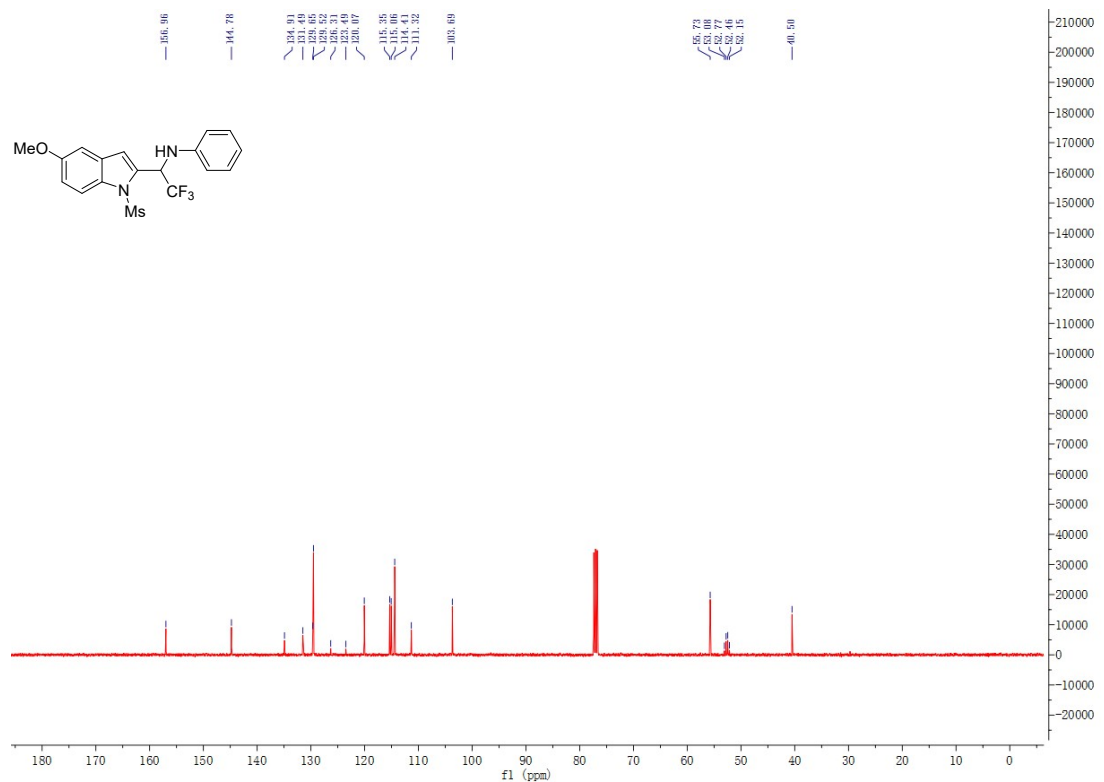

Figure S69 <sup>19</sup>F NMR spectra of compound 3x

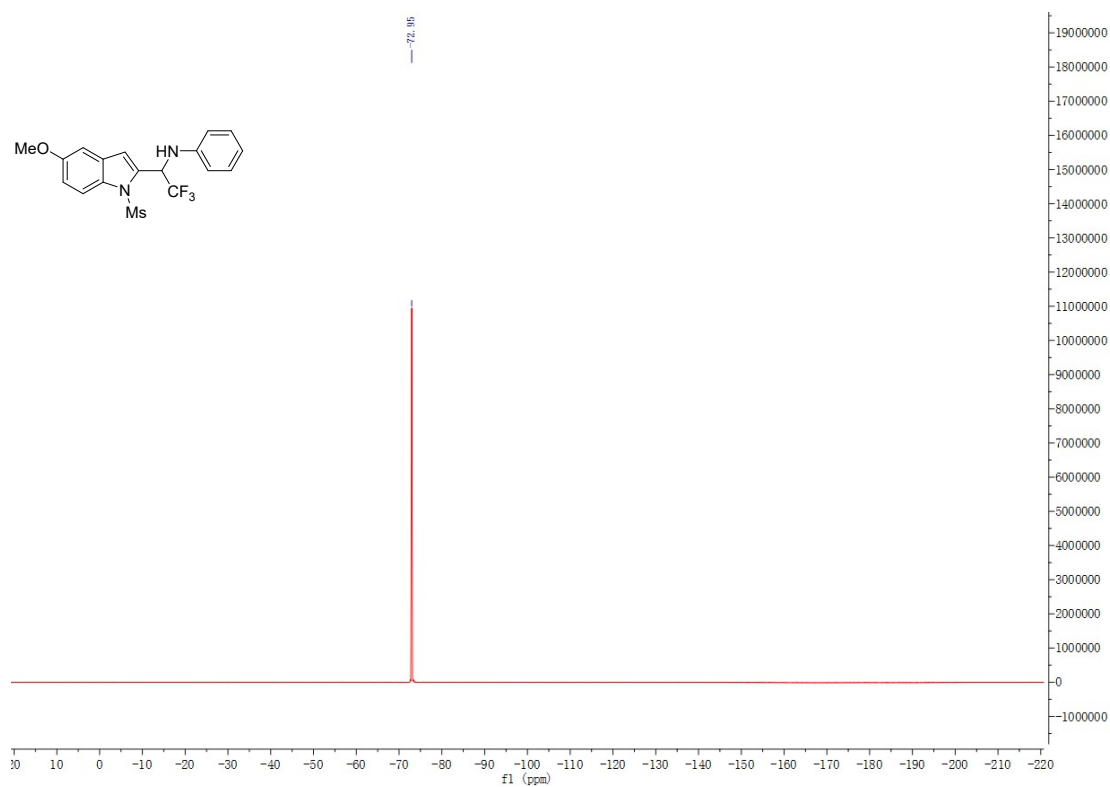

Figure S70 <sup>1</sup>H NMR spectra of compound 5

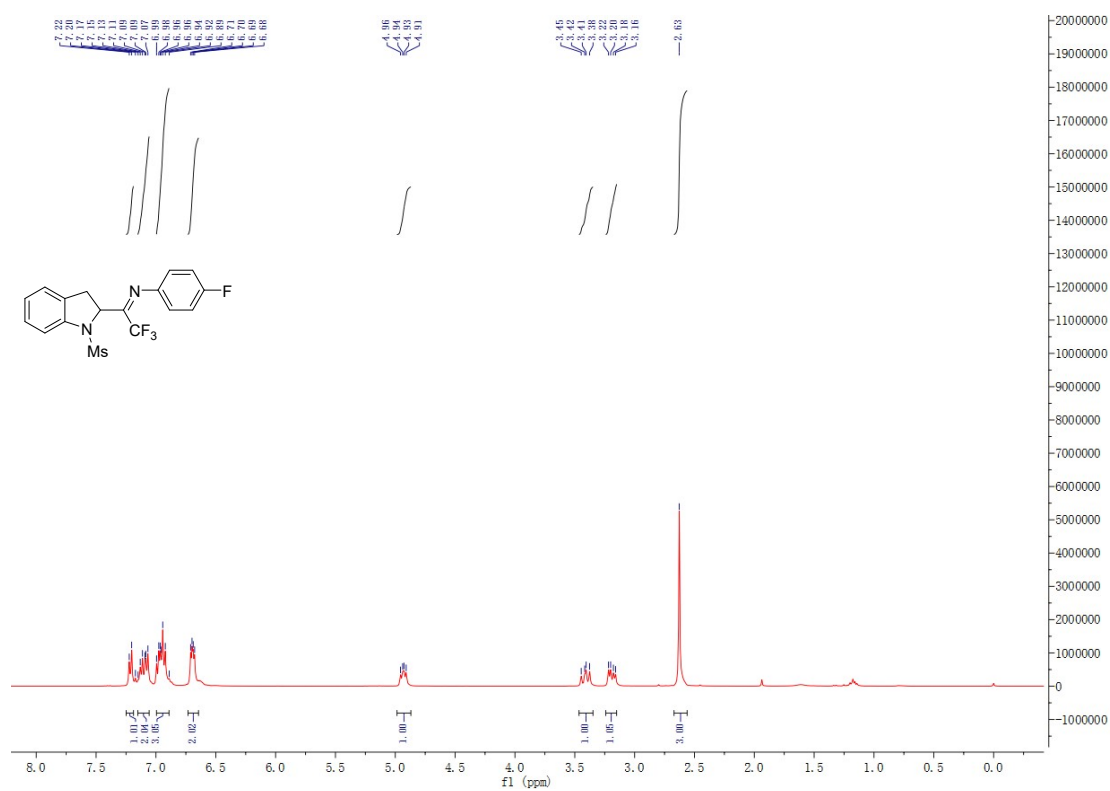

Figure S71 <sup>13</sup>CNMR spectra of compound **5**

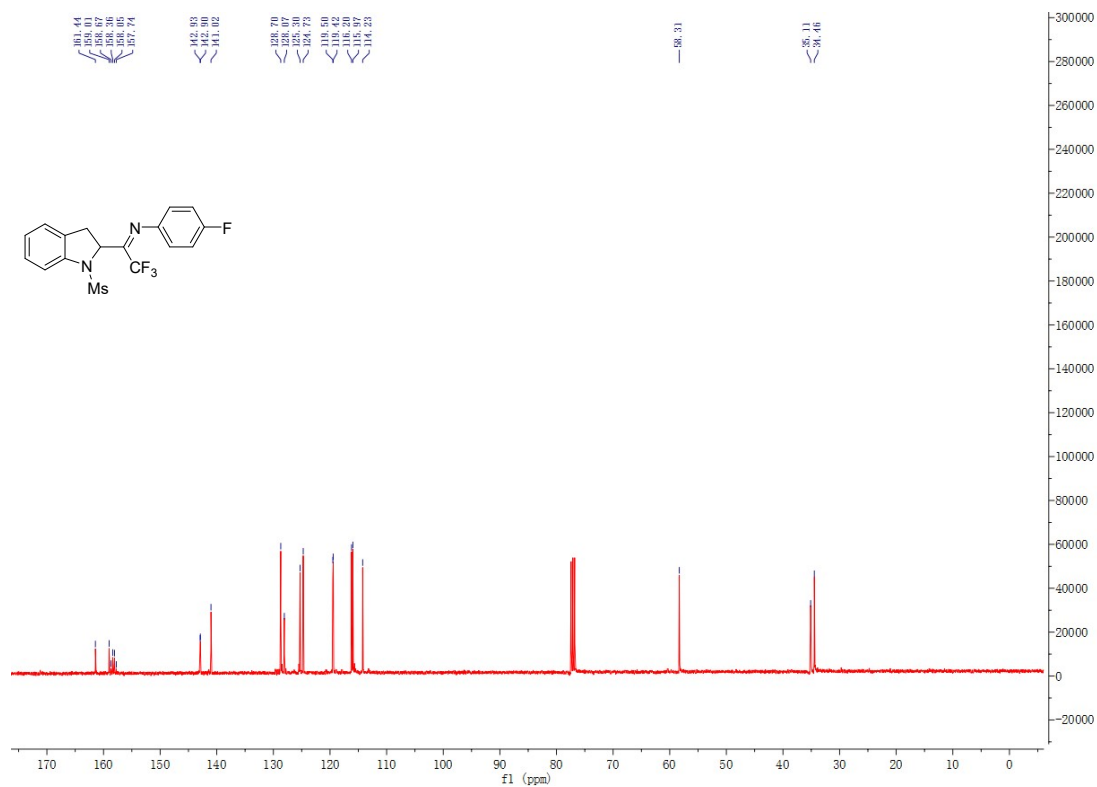

Figure S72 <sup>19</sup>FNMR spectra of compound **5**

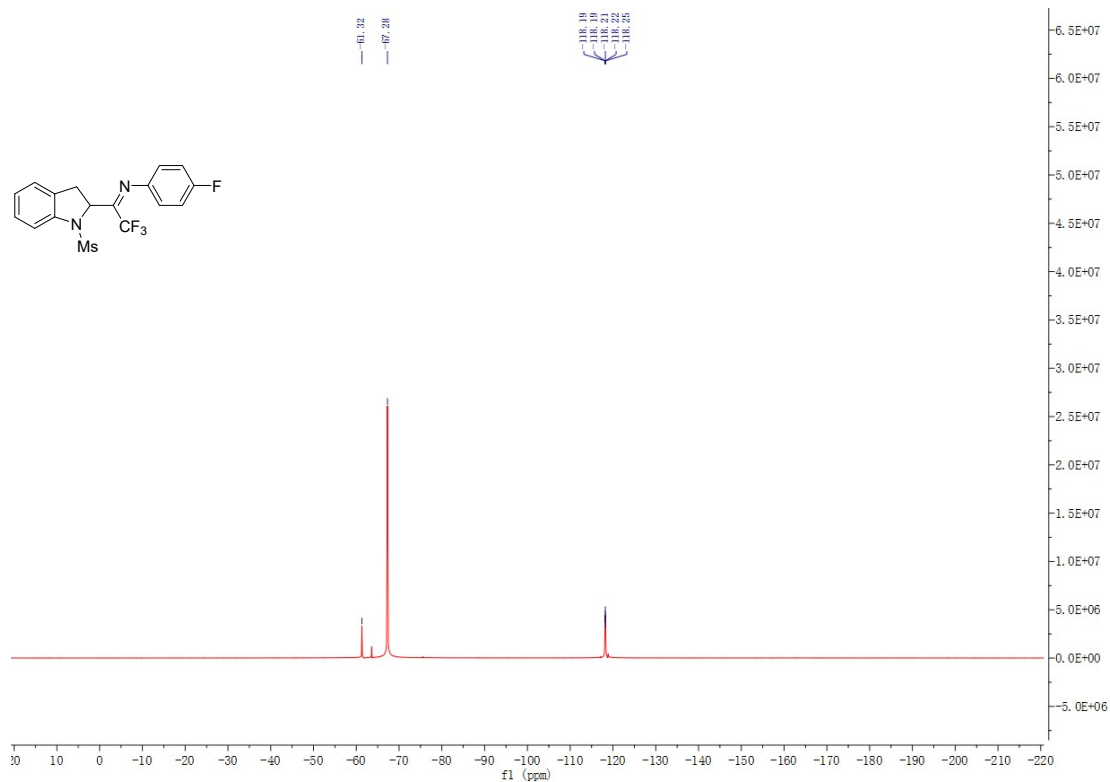

Supplement: d6ra01734g1.pdf [file d6ra01734g1.pdf]
